# Supplementary material for: Cost-effectiveness analysis of pembrolizumab plus chemotherapy for previously untreated metastatic non-small cell lung cancer in the USA
Source: PubMed Central journal article supplement — BMJ Open. 2019 Dec 11;9(12):e031019. doi: 10.1136/bmjopen-2019-031019 (PMC6924863; doi:10.1136/bmjopen-2019-031019), 2019-12-11
Supplement: bmjopen-2019-031019.draft_revisions.pdf [file bmjopen-2019-031019.draft_revisions.pdf]

# BMJ Open

BMJ Open is committed to open peer review. As part of this commitment we make the peer review history of every article we publish publicly available.

When an article is published we post the peer reviewers' comments and the authors' responses online. We also post the versions of the paper that were used during peer review. These are the versions that the peer review comments apply to.

The versions of the paper that follow are the versions that were submitted during the peer review process. They are not the versions of record or the final published versions. They should not be cited or distributed as the published version of this manuscript.

BMJ Open is an open access journal and the full, final, typeset and author-corrected version of record of the manuscript is available on our site with no access controls, subscription charges or pay-per-view fees (<http://bmjopen.bmj.com>).

If you have any questions on BMJ Open's open peer review process please email [editorial.bmjopen@bmj.com](mailto:editorial.bmjopen@bmj.com)

# BMJ Open

## Cost-effectiveness analysis of pembrolizumab plus chemotherapy for previously untreated metastatic non-small-cell lung cancer in the United States

|                               |                                                                                                                                                                                                                                                                                       |
|-------------------------------|---------------------------------------------------------------------------------------------------------------------------------------------------------------------------------------------------------------------------------------------------------------------------------------|
| Journal:                      | <i>BMJ Open</i>                                                                                                                                                                                                                                                                       |
| Manuscript ID                 | bmjopen-2019-031019                                                                                                                                                                                                                                                                   |
| Article Type:                 | Research                                                                                                                                                                                                                                                                              |
| Date Submitted by the Author: | 11-Apr-2019                                                                                                                                                                                                                                                                           |
| Complete List of Authors:     | Zeng, Xiaohui ; Second Xiangya Hospital<br>Wan, Xiaomin; Second Xiangya Hospital<br>Peng, Liubao; Second Xiangya Hospital<br>Peng, Ye; Second Xiangya Hospital<br>Ma, Fang; Second Xiangya Hospital<br>Liu, Qiao; Second Xiangya Hospital<br>Tan, Chongqing; Second Xiangya Hospital, |
| Keywords:                     | Immunology < BASIC SCIENCES, CHEMOTHERAPY, HEALTH ECONOMICS                                                                                                                                                                                                                           |
|                               |                                                                                                                                                                                                                                                                                       |

SCHOLARONE™  
Manuscripts

1  
2  
3  
4 **1 Cost-effectiveness analysis of pembrolizumab plus chemotherapy for previously**  
5 **2 untreated metastatic non-small-cell lung cancer in the United States**

6  
7  
8  
9 3 *Xiaohui Zeng<sup>c,§</sup>, Xiaomin Wan<sup>a,§</sup>, Liubao Peng<sup>a</sup>, Ye Peng<sup>a</sup>, Fang Ma<sup>b</sup>, Qiao Liu<sup>a</sup>, Chongqing Tan<sup>a,\*</sup>*

10  
11  
12 4 <sup>§</sup>Xiaohui Zeng and Xiaomin Wan contributed equally to this work.

13  
14  
15 5 <sup>a</sup> Department of Pharmacy, The Second Xiangya Hospital, Central South University, Changsha, Hunan  
16 410011, China

17  
18  
19 7 <sup>b</sup> Department of Oncology, The Second Xiangya Hospital, Central South University, Changsha, Hunan  
20 410011, China

21  
22  
23 9 <sup>c</sup> PET-CT Center, The Second Xiangya Hospital, Central South University, Changsha, Hunan 410011,  
24 China

25  
26  
27  
28 11 **\*Author for correspondence:** Chongqing Tan. Department of Pharmacy, The Second Xiangya Hospital,  
29 Central South University, Changsha, Hunan 410011, China. Tel: +86073185292094. Email:  
30 [tanchongqing@csu.edu.cn](mailto:tanchongqing@csu.edu.cn).  
31  
32  
33

34  
35 14 **Word count:** 1821.  
36  
37  
38  
39  
40  
41  
42  
43  
44  
45  
46  
47  
48  
49  
50  
51  
52  
53  
54  
55  
56  
57  
58  
59  
60

## 33 Abstract

34 **Objectives:** We evaluated the cost-effectiveness of pembrolizumab plus standard chemotherapy in the  
35 first-line setting for patients with metastatic non-small cell lung cancer (NSCLC) from the US-payer  
36 perspective. **Methods:** We constructed a Markov model to analyse the cost-effectiveness of  
37 pembrolizumab plus chemotherapy in the first-line treatment of metastatic NSCLC. Health outcomes  
38 were estimated in quality-adjusted life-years (QALYs). The cost information was from Medicare in 2018.  
39 One-way and probabilistic sensitivity analyses examined the impact of uncertainty and assumptions on  
40 the results. **Results:** The base-case analysis demonstrated that pembrolizumab plus chemotherapy  
41 provided an additional 0.78 QALYs at incremental cost of \$151,409, resulting in an incremental  
42 cost-effectiveness ratio (ICER) of \$194,372/QALY. The ICER for pembrolizumab plus chemotherapy  
43 was > \$149,680/QALY in all of our univariable and probabilistic sensitivity analyses. **Conclusions:**  
44 Pembrolizumab in addition to chemotherapy provides modest incremental benefit at high incremental cost  
45 per QALY for the treatment of previously untreated metastatic NSCLC.

46  
47 **Keywords:** Lung cancer, cost-effectiveness analysis, pembrolizumab, immunotherapy, quality-adjusted  
48 life years, sensitivity analysis.

## 50 Article Summary

- 51 1. The study strengths of this model-based economic assessment include that it is based on rigorous  
52 randomized controlled trials.
- 53 2. From a US payer perspective, the cost and outcome data included in the model are collected for  
54 analysis.
- 55 3. The limitation of this study is that because of the limited time scale of the model and the lack of  
56 long-term data, not all potential outcomes are included.

## 58 1 Introduction

59 Globally, lung cancer had an incidence rate of 27.4 per 100,000 and a mortality rate of 23.1 per  
60 100,000 in 2018 [1], and non-small cell lung cancer (NSCLC) accounted for the vast majority of these  
61 cases [2]. Multiple drug regimens are available for the treatment of advanced NSCLC, including platinum  
62 based combination chemotherapy, anaplastic lymphoma kinase (ALK) tyrosine kinase inhibitor (TKI),  
63 epidermal growth factor receptor (EGFR)TKI and immune checkpoint inhibitors[2]. Immune checkpoint  
64 inhibitors showed higher efficacy and less toxicity compared to other [3].

1  
2  
3  
4  
5 65 A new era of treating advanced NSCLC is upon us after the emergence of immunosuppressive  
6 66 agents [4]. Immune checkpoint inhibitors improve antitumor immunity by inhibiting programmed death  
7 67 1(PD-1) receptor or programmed cell death ligand 1 (PD-L1) [2 5-7]. Pembrolizumab, a PD-1 inhibitor,  
8  
9 68 was ratified by the US Food and Drug Administration (FDA) for treatment of advanced NSCLC in 2015  
10  
11  
12 69 [8 9].The Keynote-189 clinical trial showed pembrolizumab in combination with pemetrexed plus  
13  
14 70 carboplatin or cisplatin could extended progression-free survival (PFS) by 3.9 months for patients with  
15  
16 71 metastatic NSCLC without sensitizing ALK or EGFR mutations [10].  
17

18 72 Although pembrolizumab plus chemotherapy improved survival significantly, the additional cost  
19  
20 73 was notably high. Therefore, it is worth discussing whether pembrolizumab plus chemotherapy is a  
21  
22 74 cost-effective regimen. The goal of this study was to analyse the cost-effectiveness of pembrolizumab  
23  
24 75 plus chemotherapy for previously untreated metastatic NSCLC without ALK or EGFR mutations from  
25  
26 76 the US-payer perspective.  
27

## 27 77 **2 Material and methods**

### 28 78 **2.1 Decision model**

29  
30  
31  
32  
33  
34 79 A Markov model was built to simulate the flow process of patient morbidity, treatment, and  
35  
36 80 survival for previously untreated metastatic NSCLC, using three states, namely PFS state, disease  
37  
38 81 progression survival state, and death (Fig.1).All patients entranced the model in the PFS state, with  
39  
40 82 the treatment of pemetrexed combined platinum plus pembrolizumab or placebo. Patients who  
41  
42 83 experienced progression could receive carboplatin plus pemetrexed, docetaxel plus ramucirumab,  
43  
44 84 docetaxel monotherapy, nivolumab or pembrolizumab, because these regimens were used most in  
45  
46 85 the Keynote-189 trial [10]. All patients were assumed to receive end-of-life care before death.  
47

48 86 Each health state was assigned a health utility from published studies. Only direct costs were  
49  
50 87 considered and adapted for 2018 US dollars using the Medical Care Consumer Price Index. All costs and  
51  
52 88 health outcomes were discounted at an annual discount rate of 3% [11]. The model simulated a 20-year  
53  
54 89 period and each model cycle represented 21 days because in the clinical trial patients received  
55  
56 90 pembrolizumab plus chemotherapy every 3 weeks [10]. The primary outputs of the Markov model  
57  
58 91 included cost and quality-adjusted life years (QALYs), which were applied to estimate the incremental  
59  
60

1  
2  
3  
4  
5 92 cost-effectiveness ratio (ICER). All analyses were performed in TreeAge pro 2018 software  
6  
7 93 (<https://www.treeage.com>).

## 94 2.2 Model probabilities

95 The probability of transition of disease progression and from any state to death were from the  
96 survival curve of pembrolizumab or placebo combined with chemotherapy in the keynote-189 trial [10].  
97 We used the GetData Graph Digitizer software (version 2.25) to extract the data points of the  
98 Kaplan-Meier curves. According to the Akaike information criterion (AIC) and Bayesian information  
99 criterion (BIC), the PFS data points were fitted by a Weibull distribution, and overall survival (OS) data  
100 points were fitted with an exponential distribution [12]. The distribution parameters were calculated using  
101 the method of Hoyle et al [12]. Finally, the PFS and OS rates of each cycle were estimated by  $\exp(-\lambda t^\gamma)$   
102 and  $\exp(-\lambda t)$ , respectively, where  $\lambda$  is the scale parameter,  $\gamma$  is the shape parameter, and  $t$  is survival time  
103 (Table 1 near here).

## 104 2.3 Costs

105 Only direct costs, including the costs of the drug, premedication, administration and management of  
106 serious adverse events (AEs) (Table 1 near here), were considered in our evaluation. In the PFS state, the  
107 cost of the intravenous drug for 3-week cycle was based on the following doses: pembrolizumab  
108 200mg/cycle, pemetrexed 500mg/m<sup>2</sup>, cisplatin 75 mg/m<sup>2</sup> and carboplatin 400 mg/m<sup>2</sup>.

109 The model considered the hospitalization cost of patients with AE  $\geq$  grade 3, and the incidence  
110 rate exceeded 5% because these AEs were of great concern to clinicians[13]. And then the incidence rates  
111 of neutropenia and pneumonia from the Keynote-189 trial, were used to calculate the cost of AEs  
112 treatments [10].

113 Based on the Keynote-189 trial [10], 30.5% of the patients in the pembrolizumab plus chemotherapy  
114 group and 46.6% in the placebo plus chemotherapy group received subsequent therapy after disease  
115 progression. Among patients in the pembrolizumab plus chemotherapy group, 3% received carboplatin  
116 plus pemetrexed, 2.3% received docetaxel plus ramucirumab, 17.8% received docetaxel, 4% received  
117 nivolumab and 3.4% received continuation maintenance treatment of pembrolizumab; among patients in  
118 the placebo plus chemotherapy group, 1.7% received docetaxel, 7.8% received nivolumab and 38%

1  
2  
3  
4  
5 119 received crossover treatment with pembrolizumab. Patients who died accrued the cost of terminal care,  
6  
7 120 including hospitalization, palliative chemotherapy, doctor consultation, laboratory, and diagnostic tests,  
8  
9 121 according to the published literature [14].

10  
11 122 The mean value of a body-surface area and body weight are 1.84m<sup>2</sup> and 82kg, respectively [13 15].  
12  
13 123 The drug costs were taken from the Centers for Medicare and Medicaid Services[16]. Administration  
14  
15 124 costs were calculated according to the Medicare physician fee schedule for 2018[17]. The costs of AEs  
16  
17 125 and end-of-life care were derived from the published literature [13].

## 18 19 126 **2.4 Outcome measures**

20  
21  
22 127 The outcome indicator of the study was QALYs, which is defined by the patient's life years and  
23  
24 128 health utility. In accordance with the approach of Anna Oh et al [18], we also considered the disutility of  
25  
26 129 AE. Baseline utility and disutility values were referenced in the published literature (Table 1 near here)  
27  
28 130 [19 20].

## 29 30 131 **2.5 Analysis**

31  
32  
33 132 The uncertainty of the parameters was evaluated by one-way sensitivity analysis and probabilistic  
34  
35 133 sensitivity analysis, through the use of tornado diagrams and Monte Carlo simulation respectively. The  
36  
37 134 beta distribution was applied for the utilities, and the lognormal distribution was applied for the cost.  
38  
39 135 Utilities were varied over their 95% CIs. In general, the upper and lower limits of the parameters were  
40  
41 136 taken from the literature, and if otherwise, upper and lower limits of 25% were set. All baseline values  
42  
43 137 and ranges for variables are shown in Table 1.

## 44 45 138 **3 Results**

### 46 47 48 139 **3.1 Base case analysis**

49  
50  
51 140 In the base case analysis, the lifetime cost of using pembrolizumab plus chemotherapy was \$288,532  
52  
53 141 compared with \$137,123 for placebo plus chemotherapy. When considering effectiveness, the  
54  
55 142 pembrolizumab plus chemotherapy strategy yielded 1.61 QALYs, compared with 0.83 QALYs for the  
56  
57 143 placebo plus chemotherapy strategy. The ICER of pembrolizumab plus chemotherapy was calculated as  
58  
59 144 \$194,372/QALY compared with the placebo plus chemotherapy.

### 145 **3.2 Sensitivity analysis**

146 The tornado diagrams present the results of one-way sensitivity analyses. Obviously, the cost of  
147 pembrolizumab, the cost of subsequent treatment in the placebo-combination group and baseline utility  
148 values of OS were the most relatively sensitive parameters, and the ICER range was from  
149 \$149,680/QALY to \$239,065/QALY (Fig.2). The discount rate, the cost of subsequent treatment in the  
150 pembrolizumab-combination group, the cost of pemetrexed, the baseline utility value of PFS and the cost  
151 of AE management had little impact on the model.

152 The cost-effectiveness acceptability curve shows the probabilistic sensitivity analysis results of  
153 different willingness-to-pay (WTP) thresholds (Fig.3). The probability that pembrolizumab combined  
154 with chemotherapy is cost-effective increased as WTP increased. These results showed that the  
155 cost-effectiveness probability of pembrolizumab plus chemotherapy was 0% under the condition of a  
156 WTP threshold of \$130,000/QALY. If WTP threshold is \$192,000/QALY, the pembrolizumab plus  
157 chemotherapy strategy show a 50% chance cost-effectiveness (Fig.3).

### 158 **4 Discussion**

159 We performed a cost-effectiveness analysis of pembrolizumab in addition to chemotherapy in  
160 previously untreated metastatic NSCLC. Based on our model, the ICER for pembrolizumab plus  
161 chemotherapy was estimated as \$194,372/QALY compared with the placebo plus chemotherapy. The  
162 results of probabilistic sensitivity analysis suggested that the cost-effectiveness probability of  
163 pembrolizumab plus chemotherapy was 0% under the condition of a WTP threshold of \$130,000/QALY.

164 There were many published study estimated the cost-effectiveness of pembrolizumab monotherapy  
165 as first-line setting for advanced NSCLC across multiple countries, with ICERs ranging from  
166 \$52,000/QALY to \$110,000/QALY [14 21-24], and if pembrolizumab monotherapy was used as a  
167 second-line treatment, the ICER was \$168,619/QALY compared with docetaxel [13]. As a second-line  
168 treatment compared with docetaxel, the value of another immunosuppressive agent (nivolumab) was also  
169 evaluated to have the ICERs of A\$220,029/QALY, CHF177,478/QALY and \$15,229/QALY, from the  
170 perspective of Australia, Swiss and Canada, respectively [25-27]. Obviously the ICER we gained is  
171 comparable with the previous published studies of immunosuppressive agents used for second-line  
172 treatment [13 25-27]. These data provide reference value for evaluating the total cost of therapy and the



1  
2  
3  
4  
5 173 value of regimens for advanced NSCLC.

6 174 Our one-way sensitivity analysis revealed that the cost of pembrolizumab had a great influence on  
7  
8 175 the results of the study. High drug prices are the result of the monopoly of pharmaceutical companies and  
9  
10 176 restrictions on the negotiating power of the payer [28]. This can be addressed by providing more  
11  
12 177 meaningful price negotiation opportunities for payers and providing more evidence of a cost-effectiveness  
13  
14 178 comparison of treatment regimens [28]. We can also reduce the cost of administration by using  
15  
16 179 personalized dosing. Recent study has shown that personalized dosing (2mg/kg) and fixed dosing (200mg)  
17  
18 180 of pembrolizumab have equivalent efficacy [29]. Avoiding drug waste is extremely important in an era of  
19  
20 181 value-based cancer therapy [29]. When our study used 2 mg/kg of pembrolizumab based on the average  
21  
22 182 weight of 82 kg [15], the ICER was reduced to \$171,751. We believe that manufacturers are responsible  
23  
24 183 for providing multiple sizes of vials to minimize the chance of wastage.

25  
26 184 However, there are few limitations to our study that deserve consideration. First, we used cost  
27  
28 185 parameters provided by Medicare, which may be lower than private insurers [30]. Second, the health  
29  
30 186 utility values were taken from other data sources instead of patients who participated in the Keynote 189  
31  
32 187 trial, which limits the accuracy of our results. Unfortunately, the clinical trial did not report the quality of  
33  
34 188 life. Third, our analysis did not estimate the costs for all AEs in the PFS state, which may lead to  
35  
36 189 underestimation of AEs costs. However, considering the low incidence, we expect the inclusion of all  
37  
38 190 AEs would not change the conclusions of the present analysis. In addition, our model applied sensitivity  
39  
40 191 analysis to a wide variation of these parameters, and it does not affect the results. Fourth, our analysis was  
41  
42 192 based on the Keynote 189 trial, which excluded patients with sensitizing EGFR or ALK translocation,  
43  
44 193 because they usually used targeted agents as first-line treatment. However in the real-world setting, these  
45  
46 194 patients with unknown EGFR or ALK translocation were also likely to be received PD-L1 testing and  
47  
48 195 treated with pembrolizumab.

49 196 Overall, the combination of pembrolizumab and chemotherapy for patients with metastatic NSCLC  
50  
51 197 that we studied has high incremental cost and modest incremental benefit. New treatment technology for  
52  
53 198 tumour is continuously undergoing development, but the price of tumour drugs is also rising dramatically.  
54  
55 199 Based on our analysis, pembrolizumab offers lower value at current cost. The provision of cost-effective  
56  
57 200 care requires new pricing and payment systems to support. The process for approving new drugs and the  
58  
59  
60

201 process of incorporating them into the guidelines must balance costs and benefits, and our research can  
202 offer decision-making information for this purpose.

203

204 **Acknowledgements:** I certify that no individuals other than the listed co-authors contributed to this  
205 publication.

206 **Author Contributions:** Study concepts and design: Chongqing Tan; Clinical program: Fang Ma;  
207 Analysis and interpretation of the data: Liubao Peng, Ye Peng, Qiao Liu; The drafting and revising of the  
208 paper: Xiaohui Zeng and Xiaomin Wan; Final approved of manuscript: All authors; all authors agree to  
209 be accountable for all aspects of the work.

210 **Funding:** This work was supported by the National Natural Science Foundation of China [grant numbers  
211 81401547, 81603081]; and the Key Science-Technology Research and Development Program of Hunan  
212 Province [grant number 2016JC2062].

213 **Conflict of interest:** None declared.

214 **Data sharing statement:** No additional data available.

215

## 216 **References**

- 217 1. WHO. International Agency for Research on Cancer. Estimated number of new cases in 2018,  
218 world, both sexes, all age. <http://globocan.iarc.fr>. Accessed 15 Dec 2018.
- 219 2. Nation Comprehensive Cancer Network. Non-small cell lung cancer. 2nd ed (2018).  
220 <https://www.nccn.org/>. Accessed 15 Dec 2018.
- 221 3. Peters S, Kerr KM, Stahel R. PD-1 blockade in advanced NSCLC: A focus on pembrolizumab.  
222 *Cancer Treat Rev* 2018;**62**:39-49 doi: 10.1016/j.ctrv.2017.10.002[published Online First:  
223 Epub Date]].
- 224 4. Weiss GJ. A new era of treating advanced lung cancer is upon us. *Transl Lung Cancer Res*  
225 2018;**7**(Suppl 3):S202-S05 doi: 10.21037/tlcr.2018.07.03[published Online First: Epub  
226 Date]].
- 227 5. Garon EB, Rizvi NA, Hui R, et al. Pembrolizumab for the treatment of non-small-cell lung cancer.  
228 *N Engl J Med* 2015;**372**(21):2018-28 doi: 10.1056/NEJMoa1501824[published Online  
229 First: Epub Date]].
- 230 6. Scarpaccia SL. Metastatic squamous cell non-small-cell lung cancer (NSCLC): disrupting the drug  
231 treatment paradigm with immunotherapies. *Drugs Context* 2015;**4**:212289 doi:

- 1  
2  
3  
4 232 10.7573/dic.212289[published Online First: Epub Date]].
- 5  
6 233 7. Armand P. Immune checkpoint blockade in hematologic malignancies. *Blood*  
7 234 2015;**125**(22):3393-400 doi: 10.1182/blood-2015-02-567453[published Online First:  
8 235 Epub Date]].
- 9  
10 236 8. Dang TO, Ogunniyi A, Barbee MS, et al. Pembrolizumab for the treatment of PD-L1 positive  
11 237 advanced or metastatic non-small cell lung cancer. *Expert Rev Anticancer Ther*  
12 238 2016;**16**(1):13-20 doi: 10.1586/14737140.2016.1123626[published Online First: Epub  
13 239 Date]].
- 14  
15 240 9. Sul J, Blumenthal GM, Jiang X, et al. FDA Approval Summary: Pembrolizumab for the Treatment  
16 241 of Patients With Metastatic Non-Small Cell Lung Cancer Whose Tumors Express  
17 242 Programmed Death-Ligand 1. *Oncologist* 2016;**21**(5):643-50 doi:  
18 243 10.1634/theoncologist.2015-0498[published Online First: Epub Date]].
- 19  
20 244 10. Gandhi L, Rodriguez-Abreu D, Gadgeel S, et al. Pembrolizumab plus Chemotherapy in  
21 245 Metastatic Non-Small-Cell Lung Cancer. *N Engl J Med* 2018;**378**(22):2078-92 doi:  
22 246 10.1056/NEJMoa1801005[published Online First: Epub Date]].
- 23  
24 247 11. Goldstein DA, Ahmad BB, Chen Q, et al. Cost-Effectiveness Analysis of Regorafenib for  
25 248 Metastatic Colorectal Cancer. *J Clin Oncol* 2015;**33**(32):3727-32 doi:  
26 249 10.1200/JCO.2015.61.9569[published Online First: Epub Date]].
- 27  
28 250 12. Hoyle MW, Henley W. Improved curve fits to summary survival data: application to economic  
29 251 evaluation of health technologies. *BMC Med Res Methodol* 2011;**11**:139 doi:  
30 252 10.1186/1471-2288-11-139[published Online First: Epub Date]].
- 31  
32 253 13. Huang M, Lou Y, Pellissier J, et al. Cost-effectiveness of pembrolizumab versus docetaxel for  
33 254 the treatment of previously treated PD-L1 positive advanced NSCLC patients in the  
34 255 United States. *J Med Econ* 2017;**20**(2):140-50 doi:  
35 256 10.1080/13696998.2016.1230123[published Online First: Epub Date]].
- 36  
37 257 14. Huang M, Lou Y, Pellissier J, et al. Cost Effectiveness of Pembrolizumab vs. Standard-of-Care  
38 258 Chemotherapy as First-Line Treatment for Metastatic NSCLC that Expresses High Levels  
39 259 of PD-L1 in the United States. *Pharmacoeconomics* 2017 doi:  
40 260 10.1007/s40273-017-0527-z[published Online First: Epub Date]].
- 41  
42 261 15. Centers for Disease Control and Prevention. Faststats. <http://www.cdc.gov/nchs/fastats>.  
43 262 Accessed 15 Dec 2018.
- 44  
45 263 16. Center for Medicare and Medicaid Services. 2018-July-ASP-Pricing-File(2018).  
46 264 [https://www.cms.gov/apps/ama/license.asp?File=/Medicare/Medicare-Fee-for-Service-](https://www.cms.gov/apps/ama/license.asp?File=/Medicare/Medicare-Fee-for-Service-Part-B-Drugs/McrPartBDrugAvgSalesPrice/Downloads/2018-July-ASP-Pricing-File.zip)  
47 265 [Part-B-Drugs/McrPartBDrugAvgSalesPrice/Downloads/2018-July-ASP-Pricing-File.zip](https://www.cms.gov/apps/ama/license.asp?File=/Medicare/Medicare-Fee-for-Service-Part-B-Drugs/McrPartBDrugAvgSalesPrice/Downloads/2018-July-ASP-Pricing-File.zip).  
48 266 Accessed 15 Dec 2018.
- 49  
50 267 17. Goldstein DA, Chen Q, Ayer T, et al. First- and second-line bevacizumab in addition to  
51 268 chemotherapy for metastatic colorectal cancer: a United States-based cost-effectiveness  
52 269 analysis. *J Clin Oncol* 2015;**33**(10):1112-8 doi: 10.1200/JCO.2014.58.4904[published  
53 270 Online First: Epub Date]].
- 54  
55 271 18. Oh A, Tran DM, McDowell LC, et al. Cost-Effectiveness of Nivolumab-Ipilimumab Combination  
56 272 Therapy Compared with Monotherapy for First-Line Treatment of Metastatic Melanoma  
57 273 in the United States. *J Manag Care Spec Pharm* 2017;**23**(6):653-64 doi:  
58 274 10.18553/jmcp.2017.23.6.653[published Online First: Epub Date]].
- 59  
60

- 1  
2  
3  
4 275 19. Chouaid C, Agulnik J, Goker E, et al. Health-related quality of life and utility in patients with  
5 276 advanced non-small-cell lung cancer: a prospective cross-sectional patient survey in a  
6 277 real-world setting. *J Thorac Oncol* 2013;**8**(8):997-1003 doi:  
7 278 10.1097/JTO.0b013e318299243b[published Online First: Epub Date]].  
8  
9 279 20. Nafees B, Stafford M, Gavriel S, et al. Health state utilities for non small cell lung cancer.  
10 280 *Health Qual Life Outcomes* 2008;**6**:84 doi: 10.1186/1477-7525-6-84[published Online  
11 281 First: Epub Date]].  
12  
13 282 21. Liao W, Huang J, Hutton D, et al. Cost-effectiveness analysis of first-line pembrolizumab  
14 283 treatment for PD-L1 positive, non-small cell lung cancer in China. *J Med Econ* 2019;1 doi:  
15 284 10.1080/13696998.2019.1570221[published Online First: Epub Date]].  
16  
17 285 22. Chouaid C, Bensimon L, Clay E, et al. Cost-effectiveness analysis of pembrolizumab versus  
18 286 standard-of-care chemotherapy for first-line treatment of PD-L1 positive (>50%)  
19 287 metastatic squamous and non-squamous non-small cell lung cancer in France. *Lung*  
20 288 *Cancer* 2019;**127**:44-52 doi: 10.1016/j.lungcan.2018.11.008[published Online First: Epub  
21 289 Date]].  
22  
23 290 23. Hu X, Hay JW. First-line pembrolizumab in PD-L1 positive non-small-cell lung cancer: A  
24 291 cost-effectiveness analysis from the UK health care perspective. *Lung Cancer*  
25 292 2018;**123**:166-71 doi: 10.1016/j.lungcan.2018.07.012[published Online First: Epub  
26 293 Date]].  
27  
28 294 24. Georgieva M, da Silveira Nogueira Lima JP, Aguiar P, Jr., et al. Cost-effectiveness of  
29 295 pembrolizumab as first-line therapy for advanced non-small cell lung cancer. *Lung*  
30 296 *Cancer* 2018;**124**:248-54 doi: 10.1016/j.lungcan.2018.08.018[published Online First:  
31 297 Epub Date]].  
32  
33 298 25. Gao L, Li SC. Modelled Economic Evaluation of Nivolumab for the Treatment of Second-Line  
34 299 Advanced or Metastatic Squamous Non-Small-Cell Lung Cancer in Australia Using Both  
35 300 Partition Survival and Markov Models. *Applied health economics and health policy* 2018  
36 301 doi: 10.1007/s40258-018-0452-0[published Online First: Epub Date]].  
37  
38 302 26. Matter-Walstra K, Schwenkglenks M, Aebi S, et al. A Cost-Effectiveness Analysis of Nivolumab  
39 303 versus Docetaxel for Advanced Nonsquamous NSCLC Including PD-L1 Testing. *J Thorac*  
40 304 *Oncol* 2016;**11**(11):1846-55 doi: 10.1016/j.jtho.2016.05.032[published Online First: Epub  
41 305 Date]].  
42  
43 306 27. Goeree R, Villeneuve J, Goeree J, et al. Economic evaluation of nivolumab for the treatment  
44 307 of second-line advanced squamous NSCLC in Canada: a comparison of modeling  
45 308 approaches to estimate and extrapolate survival outcomes. *J Med Econ*  
46 309 2016;**19**(6):630-44 doi: 10.3111/13696998.2016.1151432[published Online First: Epub  
47 310 Date]].  
48  
49 311 28. Kesselheim AS, Avorn J, Sarpatwari A. The High Cost of Prescription Drugs in the United States:  
50 312 Origins and Prospects for Reform. *Jama* 2016;**316**(8):858-71 doi:  
51 313 10.1001/jama.2016.11237[published Online First: Epub Date]].  
52  
53 314 29. Goldstein DA, Gordon N, Davidescu M, et al. A Pharmacoeconomic Analysis of Personalized  
54 315 Dosing vs Fixed Dosing of Pembrolizumab in Firstline PD-L1-Positive Non-Small Cell Lung  
55 316 Cancer. *J Natl Cancer Inst* 2017;**109**(11) doi: 10.1093/jnci/djx063[published Online First:  
56 317 Epub Date]].  
57  
58  
59  
60

1  
2  
3  
4  
5  
6  
7  
8  
9  
10  
11  
12  
13  
14  
15  
16  
17  
18  
19  
20  
21  
22  
23  
24  
25  
26  
27  
28  
29  
30  
31  
32  
33  
34  
35  
36  
37  
38  
39  
40  
41  
42  
43  
44  
45  
46  
47  
48  
49  
50  
51  
52  
53  
54  
55  
56  
57  
58  
59  
60

318 30. Medicare Payment Advisory Commission. March 2018 Report To the Congress: Medicare  
319 Payment Policy. <http://www.medpac.gov/-documents-reports>. Accessed 15 Dec 2018.  
320

For peer review only

321 Table 1 Parameters for Cost Effectiveness Model

| Parameter                                  | Pembrolizumab |             | Placebo |             | Distribution |
|--------------------------------------------|---------------|-------------|---------|-------------|--------------|
|                                            | Value         | Ranges      | Value   | Ranges      |              |
| Probabilities                              |               |             |         |             |              |
| PFS (Weibull)                              |               |             |         |             |              |
| Scale( $\lambda$ )                         | 0.0448        |             | 0.0876  |             |              |
| Shape( $\gamma$ )                          | 1.2675        |             | 1.2312  |             |              |
| OS(exponential)                            |               |             |         |             |              |
| Scale( $\lambda$ )                         | 0.0290        |             | 0.0586  |             |              |
| Costs (\$)                                 |               |             |         |             |              |
| Pembrolizumab/mg [16]                      | 48.57         | +/- 25%     | 48.57   | +/- 25%     | Lognorm      |
| Pemetrexed/mg [16]                         | 6.75          | +/- 25%     | 6.75    | +/- 25%     | Lognorm      |
| Cisplatin/mg [16]                          | 0.20          | +/- 25%     | 0.20    | +/- 25%     | Lognorm      |
| Carboplatin/mg [16]                        | 0.06          | +/- 25%     | 0.06    | +/- 25%     | Lognorm      |
| Chemotherapy infusion 1 hour [16]          | 145           | +/- 25%     | 145     | +/- 25%     | Lognorm      |
| Chemotherapy infusion additional hour [16] | 32            | +/- 25%     | 32      | +/- 25%     | Lognorm      |
| Subsequent therapies/cycle [16]            | 1160          | +/- 25%     | 4394    | +/- 25%     | Lognorm      |
| End-of-life care [14]                      | 33009         | +/- 25%     | 33009   | +/- 25%     | Lognorm      |
| AE hospitalization cost [13]               | 3538          | +/- 50%     | 3005    | +/-50%      | Lognorm      |
| Baseline utilities                         |               |             |         |             |              |
| PFS [19]                                   | 0.71          | 0.67–0.76   | 0.71    | 0.67–0.76   | Beta         |
| OS [19]                                    | 0.67          | 0.59–0.75   | 0.67    | 0.59–0.75   | Beta         |
| Disutilities                               |               |             |         |             |              |
| Neutropenia [20]                           | 0.09          | 0.060-0.119 | 0.09    | 0.060-0.119 | Beta         |
| Pneumonia [20]                             | 0.09          | 0.059-0.121 | 0.09    | 0.059-0.121 | Beta         |

322 PFS: progression-free survival; OS: overall survival; AE: adverse effect.

323

1  
2  
3  
4  
5 324 **Fig.1** State transition diagram. The three circles show three main health states. Patients can transition  
6  
7 325 from “progression-free survival” to “disease progression survival” or “death”  
8

9 326

10 327 **Fig.2** Tornado diagrams. The graphic shows the impact of varying individual model inputs on the  
11  
12 328 cost-effectiveness of pembrolizumab plus chemotherapy for metastatic NSCLC. ICER: incremental  
13  
14 329 cost-effectiveness ratio. NSCLC: non-small cell lung cancer  
15

16 330

17  
18 331 **Fig.3** Cost-effectiveness acceptability curve. This plot represents the results of a probabilistic sensitivity  
19  
20 332 analysis (for details, see Methods) comparing the cost-effectiveness of  
21  
22 333 pembrolizumab-pemetrexed-platinum versus placebo-pemetrexed-platinum in metastatic NSCLC. CE:  
23  
24 334 cost-effectiveness. NSCLC: non-small cell lung cancer  
25

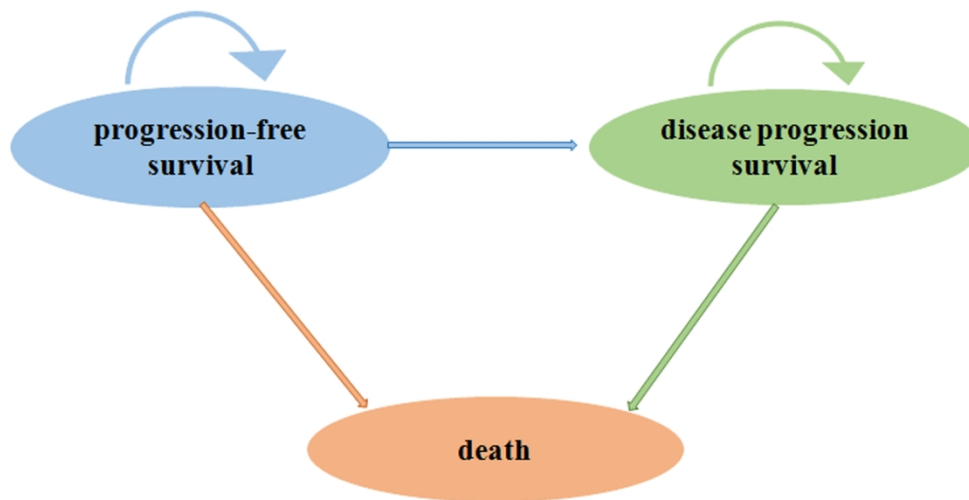

Fig.1 State transition diagram. The three circles show three main health states. Patients can transition from "progression-free survival" to "disease progression survival" or "death"

82x45mm (600 x 600 DPI)



1  
2  
3  
4  
5  
6  
7  
8  
9  
10  
11  
12  
13  
14  
15  
16  
17  
18  
19  
20  
21  
22  
23  
24  
25  
26  
27  
28  
29  
30  
31  
32  
33  
34  
35  
36  
37  
38  
39  
40  
41  
42  
43  
44  
45  
46  
47  
48  
49  
50  
51  
52  
53  
54  
55  
56  
57  
58  
59  
60

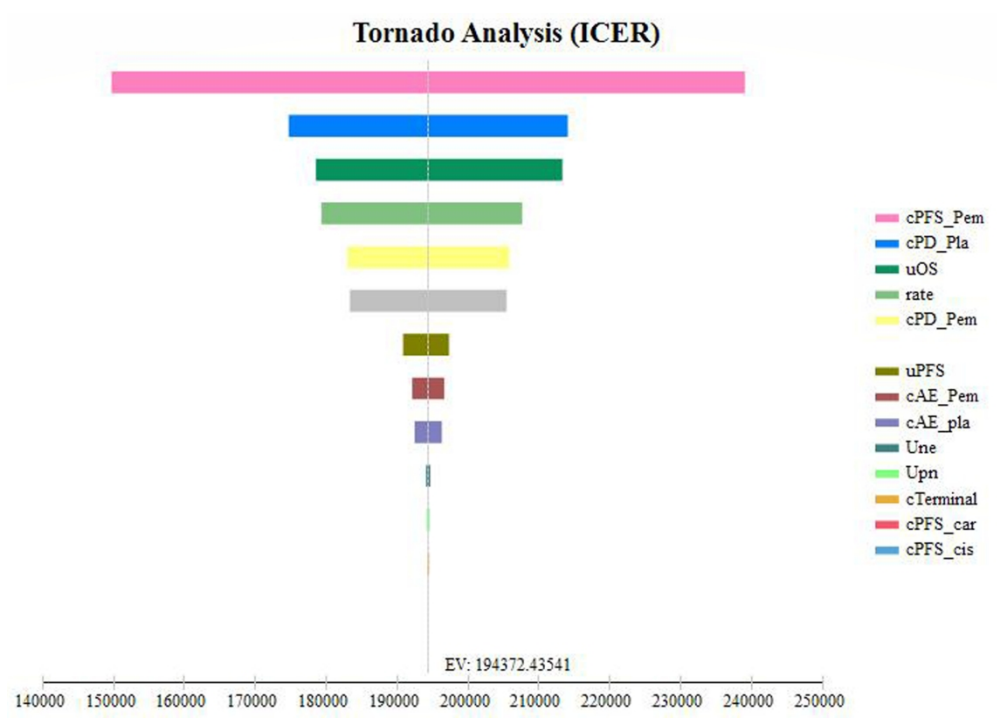

Fig.2 Tornado diagrams. The graphic shows the impact of varying individual model inputs on the cost-effectiveness of pembrolizumab plus chemotherapy for metastatic NSCLC. ICER: incremental cost-effectiveness ratio. NSCLC: non-small cell lung cancer

1574x1111mm (96 x 96 DPI)

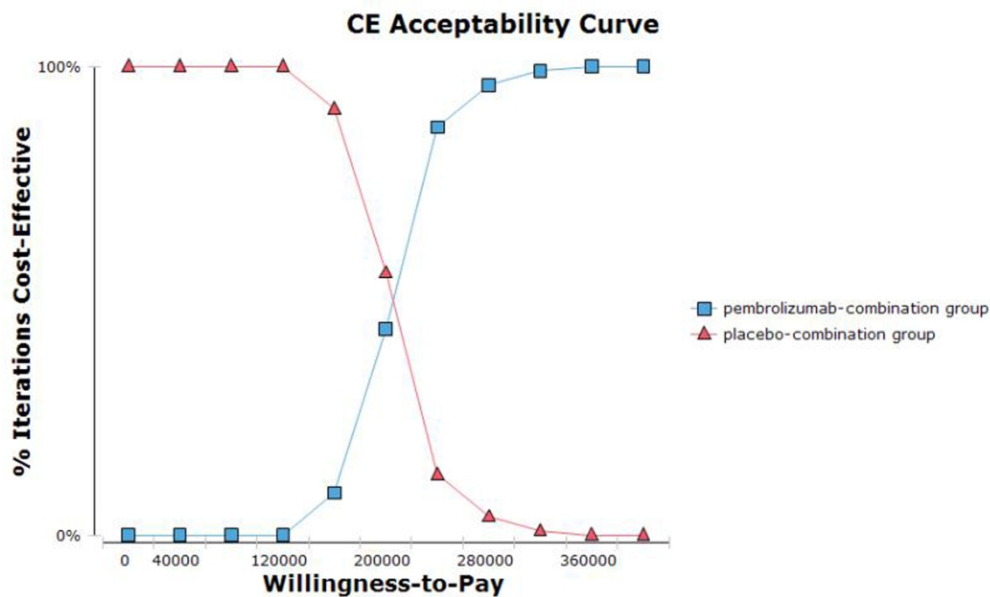

Fig.3 Cost-effectiveness acceptability curve. This plot represents the results of a probabilistic sensitivity analysis (for details, see Methods) comparing the cost-effectiveness of pembrolizumab-pemetrexed-platinum versus placebo-pemetrexed-platinum in metastatic NSCLC. CE: cost-effectiveness. NSCLC: non-small cell lung cancer

169x104mm (600 x 600 DPI)

## Consolidated Health Economic Evaluation Reporting Standards – CHEERS Checklist 1

**CHEERS Checklist****Items to include when reporting economic evaluations of health interventions**

The **ISPOR CHEERS Task Force Report**, *Consolidated Health Economic Evaluation Reporting Standards (CHEERS)—Explanation and Elaboration: A Report of the ISPOR Health Economic Evaluations Publication Guidelines Good Reporting Practices Task Force*, provides examples and further discussion of the 24-item CHEERS Checklist and the CHEERS Statement. It may be accessed via the *Value in Health* or via the ISPOR Health Economic Evaluation Publication Guidelines – CHEERS: Good Reporting Practices webpage: <http://www.ispor.org/TaskForces/EconomicPubGuidelines.asp>

| Section                         | Item No | Recommendation                                                                                                                                                                          | Reported on page No/line No |
|---------------------------------|---------|-----------------------------------------------------------------------------------------------------------------------------------------------------------------------------------------|-----------------------------|
| <b>Title and Abstract</b>       |         |                                                                                                                                                                                         |                             |
| Title                           | 1       | Identify the study as an economic evaluation or use more specific terms such as “cost-effectiveness analysis”, and describe the interventions compared.                                 | P1/L1-2                     |
| Abstract                        | 2       | Provide a structured summary of objectives, perspective, setting, methods (including study design and inputs), results (including base case and uncertainty analyses), and conclusions. | P2/L33-45                   |
| <b>Introduction</b>             |         |                                                                                                                                                                                         |                             |
| Background and objectives       | 3       | Provide an explicit statement of the broader context for the study.<br>Present the study question and its relevance for health policy or practice decisions.                            | P2-3/L58-76                 |
| <b>Methods</b>                  |         |                                                                                                                                                                                         |                             |
| Target population and subgroups | 4       | Describe characteristics of the base case population and subgroups analysed, including why they were chosen.                                                                            | P3/L79-80                   |
| Setting and location            | 5       | State relevant aspects of the system(s) in which the decision(s) need(s) to be made.                                                                                                    | P3/L81-85                   |
| Study perspective               | 6       | Describe the perspective of the study and relate this to the costs being evaluated.                                                                                                     | P3/L76                      |
| Comparators                     | 7       | Describe the interventions or strategies being compared and state why they were chosen.                                                                                                 | P3/L82                      |
| Time horizon                    | 8       | State the time horizon(s) over which costs and consequences are being evaluated and say why appropriate.                                                                                | P3/L88-89                   |
| Discount rate                   | 9       | Report the choice of discount rate(s) used for costs and outcomes and say why appropriate.                                                                                              | P3/L88                      |
| Choice of health outcomes       | 10      | Describe what outcomes were used as the measure(s) of benefit in the evaluation and their relevance for the type of analysis performed.                                                 | P3/L90-91                   |
| Measurement of effectiveness    | 11a     | <i>Single study-based estimates</i> : Describe fully the design features of the single effectiveness study and why the single                                                           |                             |

## Consolidated Health Economic Evaluation Reporting Standards – CHEERS Checklist 2

|                                                        |     |                                                                                                                                                                                                                                                                                                                                                       |               |
|--------------------------------------------------------|-----|-------------------------------------------------------------------------------------------------------------------------------------------------------------------------------------------------------------------------------------------------------------------------------------------------------------------------------------------------------|---------------|
|                                                        |     | study was a sufficient source of clinical effectiveness data.                                                                                                                                                                                                                                                                                         |               |
|                                                        | 11b | <i>Synthesis-based estimates</i> : Describe fully the methods used for identification of included studies and synthesis of clinical effectiveness data.                                                                                                                                                                                               | P5/L126-130   |
| Measurement and valuation of preference based outcomes | 12  | If applicable, describe the population and methods used to elicit preferences for outcomes.                                                                                                                                                                                                                                                           |               |
| Estimating resources and costs                         | 13a | <i>Single study-based economic evaluation</i> : Describe approaches used to estimate resource use associated with the alternative interventions. Describe primary or secondary research methods for valuing each resource item in terms of its unit cost. Describe any adjustments made to approximate to opportunity costs.                          |               |
|                                                        | 13b | <i>Model-based economic evaluation</i> : Describe approaches and data sources used to estimate resource use associated with model health states. Describe primary or secondary research methods for valuing each resource item in terms of its unit cost. Describe any adjustments made to approximate to opportunity costs.                          | P4-5/L104-125 |
| Currency, price date, and conversion                   | 14  | Report the dates of the estimated resource quantities and unit costs. Describe methods for adjusting estimated unit costs to the year of reported costs if necessary. Describe methods for converting costs into a common currency base and the exchange rate.                                                                                        | P3/L86-87     |
| Choice of model                                        | 15  | Describe and give reasons for the specific type of decision-analytical model used. Providing a figure to show model structure is strongly recommended.                                                                                                                                                                                                | P3/L79        |
| Assumptions                                            | 16  | Describe all structural or other assumptions underpinning the decision-analytical model.                                                                                                                                                                                                                                                              | P3/L80-85     |
| Analytical methods                                     | 17  | Describe all analytical methods supporting the evaluation. This could include methods for dealing with skewed, missing, or censored data; extrapolation methods; methods for pooling data; approaches to validate or make adjustments (such as half cycle corrections) to a model; and methods for handling population heterogeneity and uncertainty. | P5/L131-137   |
| <b>Results</b>                                         |     |                                                                                                                                                                                                                                                                                                                                                       |               |
| Study parameters                                       | 18  | Report the values, ranges, references, and, if used, probability distributions for all parameters. Report reasons or sources for distributions used to represent uncertainty where appropriate. Providing a table to show the input values is strongly recommended.                                                                                   | P12/L321      |
| Incremental costs and outcomes                         | 19  | For each intervention, report mean values for the main categories of estimated costs and outcomes of interest, as well as mean differences between the comparator groups. If                                                                                                                                                                          | P5/L139-144   |

## Consolidated Health Economic Evaluation Reporting Standards – CHEERS Checklist 3

|                                                                      |     |                                                                                                                                                                                                                                                                              |                |
|----------------------------------------------------------------------|-----|------------------------------------------------------------------------------------------------------------------------------------------------------------------------------------------------------------------------------------------------------------------------------|----------------|
|                                                                      |     | applicable, report incremental cost-effectiveness ratios.                                                                                                                                                                                                                    |                |
| Characterizing uncertainty                                           | 20a | <i>Single study-based economic evaluation</i> : Describe the effects of sampling uncertainty for the estimated incremental cost and incremental effectiveness parameters, together with the impact of methodological assumptions (such as discount rate, study perspective). |                |
|                                                                      | 20b | <i>Model-based economic evaluation</i> : Describe the effects on the results of uncertainty for all input parameters, and uncertainty related to the structure of the model and assumptions.                                                                                 | P6/L145-157    |
| Characterizing heterogeneity                                         | 21  | If applicable, report differences in costs, outcomes, or cost-effectiveness that can be explained by variations between subgroups of patients with different baseline characteristics or other observed variability in effects that are not reducible by more information.   |                |
| <b>Discussion</b>                                                    |     |                                                                                                                                                                                                                                                                              |                |
| Study findings, limitations, generalizability, and current knowledge | 22  | Summarise key study findings and describe how they support the conclusions reached. Discuss limitations and the generalisability of the findings and how the findings fit with current knowledge.                                                                            | P6-P8/L158-202 |
| <b>Other</b>                                                         |     |                                                                                                                                                                                                                                                                              |                |
| Source of funding                                                    | 23  | Describe how the study was funded and the role of the funder in the identification, design, conduct, and reporting of the analysis. Describe other non-monetary sources of support.                                                                                          | P8/L210-212    |
| Conflicts of interest                                                | 24  | Describe any potential for conflict of interest of study contributors in accordance with journal policy. In the absence of a journal policy, we recommend authors comply with International Committee of Medical Journal Editors recommendations.                            | P8/L213        |

For consistency, the CHEERS Statement checklist format is based on the format of the CONSORT statement checklist

The **ISPOR CHEERS Task Force Report** provides examples and further discussion of the 24-item CHEERS Checklist and the CHEERS Statement. It may be accessed via the *Value in Health* link or via the ISPOR Health Economic Evaluation Publication Guidelines – CHEERS: Good Reporting Practices webpage: <http://www.ispor.org/TaskForces/EconomicPubGuidelines.asp>

The citation for the CHEERS Task Force Report is:  
 Husereau D, Drummond M, Petrou S, et al. Consolidated health economic evaluation reporting standards (CHEERS)—Explanation and elaboration: A report of the ISPOR health economic evaluations publication guidelines good reporting practices task force. *Value Health* 2013;16:231-50.

# BMJ Open

## Cost-effectiveness analysis of pembrolizumab plus chemotherapy for previously untreated metastatic non-small-cell lung cancer in the United States

|                                 |                                                                                                                                                                                                                                                                                       |
|---------------------------------|---------------------------------------------------------------------------------------------------------------------------------------------------------------------------------------------------------------------------------------------------------------------------------------|
| Journal:                        | <i>BMJ Open</i>                                                                                                                                                                                                                                                                       |
| Manuscript ID                   | bmjopen-2019-031019.R1                                                                                                                                                                                                                                                                |
| Article Type:                   | Original research                                                                                                                                                                                                                                                                     |
| Date Submitted by the Author:   | 08-Oct-2019                                                                                                                                                                                                                                                                           |
| Complete List of Authors:       | Zeng, Xiaohui ; Second Xiangya Hospital<br>Wan, Xiaomin; Second Xiangya Hospital<br>Peng, Liubao; Second Xiangya Hospital<br>Peng, Ye; Second Xiangya Hospital<br>Ma, Fang; Second Xiangya Hospital<br>Liu, Qiao; Second Xiangya Hospital<br>Tan, Chongqing; Second Xiangya Hospital, |
| <b>Primary Subject Heading</b>: | Health economics                                                                                                                                                                                                                                                                      |
| Secondary Subject Heading:      | Oncology                                                                                                                                                                                                                                                                              |
| Keywords:                       | Immunology < BASIC SCIENCES, CHEMOTHERAPY, HEALTH ECONOMICS                                                                                                                                                                                                                           |
|                                 |                                                                                                                                                                                                                                                                                       |

SCHOLARONE™  
Manuscripts

1  
2  
3  
4 **1 Cost-effectiveness analysis of pembrolizumab plus chemotherapy for previously**  
5 **2 untreated metastatic non-small-cell lung cancer in the United States**

6  
7  
8  
9 3 *Xiaohui Zeng<sup>c,§</sup>, Xiaomin Wan<sup>a,§</sup>, Liubao Peng<sup>a</sup>, Ye Peng<sup>a</sup>, Fang Ma<sup>b</sup>, Qiao Liu<sup>a</sup>, Chongqing Tan<sup>a,\*</sup>*

10  
11  
12 4 <sup>§</sup>Xiaohui Zeng and Xiaomin Wan contributed equally to this work.

13  
14  
15 5 <sup>a</sup> Department of Pharmacy, The Second Xiangya Hospital, Central South University, Changsha, Hunan  
16 410011, China

17  
18  
19 6 <sup>b</sup> Department of Oncology, The Second Xiangya Hospital, Central South University, Changsha, Hunan  
20 410011, China

21  
22  
23 7 <sup>c</sup> PET-CT Center, The Second Xiangya Hospital, Central South University, Changsha, Hunan 410011,  
24 China

25  
26  
27  
28 8 **\*Author for correspondence:** Chongqing Tan. Department of Pharmacy, The Second Xiangya Hospital,  
29 Central South University, Changsha, Hunan 410011, China. Tel: +86073185292094. Email:  
30 [tanchongqing@csu.edu.cn](mailto:tanchongqing@csu.edu.cn).  
31  
32  
33

34  
35 9 **Word count:** 1821.  
36  
37  
38  
39  
40  
41  
42  
43  
44  
45  
46  
47  
48  
49  
50  
51  
52  
53  
54  
55  
56  
57  
58  
59  
60

1  
2  
3  
4 33 **Abstract**

5  
6 34 **Objectives:** Evaluating the cost-effectiveness of pembrolizumab plus standard chemotherapy in the  
7 first-line setting for patients with metastatic non-small cell lung cancer (NSCLC) from the US-payer  
8 perspective.  
9 36

10 37 **Design** A Markov model was constructed to analyse the cost-effectiveness of pembrolizumab plus  
11 chemotherapy in the first-line treatment of metastatic NSCLC. Health outcomes were estimated in  
12 quality-adjusted life-years (QALYs). The cost information was from Medicare in 2018. One-way and  
13 probabilistic sensitivity analyses examined the impact of uncertainty and assumptions on the results.  
14 40

15 41 **Setting** The US-payer perspective.

16 42 **Participants** A hypothetical US cohort of patients with previously untreated metastatic nonsquamous  
17 NSCLC without EGFR or ALK mutations.  
18 43

19 44 **Intervention** Pembrolizumab plus chemotherapy versus chemotherapy.

20 45 **Primary outcome measures** Costs, QALYs, incremental cost-effectiveness ratio (ICER) of  
21 pembrolizumab plus chemotherapy expressed as cost per QALY gained compared with chemotherapy  
22 46

23 47 **Results** The base-case analysis demonstrated that pembrolizumab plus chemotherapy provided an  
24 additional 0.78 QALYs at incremental cost of \$151,409, resulting in an ICER of \$194,372/QALY. The  
25 ICER for pembrolizumab plus chemotherapy was > \$149,680/QALY in all of our univariable and  
26 probabilistic sensitivity analyses.  
27 50

28 51 **Conclusions:** Pembrolizumab in addition to chemotherapy provides modest incremental benefit at high  
29 incremental cost per QALY for the treatment of previously untreated metastatic NSCLC.  
30 52

31 53  
32  
33 54 **Article Summary**

- 34  
35 55 1. The study strengths of this model-based economic assessment include that it is based on rigorous  
36 randomized controlled trials.  
37 56  
38 57 2. From a US payer perspective, the cost and outcome data included in the model are collected for  
39 analysis.  
40 58  
41 59 3. The limitation of this study is that because of the limited time scale of the model and the lack of  
42 long-term data, not all potential outcomes are included.  
43 60  
44  
45  
46  
47  
48  
49  
50  
51  
52  
53  
54  
55  
56  
57  
58  
59  
60



## 67 **1 Introduction**

68 Globally, lung cancer had an incidence rate of 27.4 per 100,000 and a mortality rate of 23.1 per  
69 100,000 in 2018 <sup>1</sup>, and non-small cell lung cancer (NSCLC) accounted for the vast majority of these cases  
70 <sup>2</sup>. Multiple drug regimens are available for the treatment of advanced NSCLC, including platinum based  
71 combination chemotherapy, anaplastic lymphoma kinase (ALK) tyrosine kinase inhibitor (TKI),  
72 epidermal growth factor receptor (EGFR)TKI and immune checkpoint inhibitors<sup>2</sup>. Immune checkpoint  
73 inhibitors showed higher efficacy and less toxicity compared to other therapies <sup>3</sup>.

74 A new era of treating advanced NSCLC is upon us after the emergence of immunosuppressive  
75 agents <sup>4</sup>. Immune checkpoint inhibitors improve antitumor immunity by inhibiting programmed death  
76 1(PD-1) receptor or programmed cell death ligand 1 (PD-L1) <sup>2 5-7</sup>. Pembrolizumab, a PD-1 inhibitor, was  
77 approved by the US Food and Drug Administration (FDA) for treatment of advanced NSCLC in 2015 <sup>8</sup>  
78 <sup>9</sup>.The Keynote-189 clinical trial showed pembrolizumab in combination with pemetrexed plus carboplatin  
79 or cisplatin could extended progression-free survival (PFS) by 3.9 months for patients with metastatic  
80 NSCLC without sensitizing ALK or EGFR mutations <sup>10</sup>.

81 Although pembrolizumab plus chemotherapy improved survival significantly, the additional cost  
82 was notably high. Therefore, it is worth discussing whether pembrolizumab plus chemotherapy is a  
83 cost-effective regimen. The goal of this study was to analyse the cost-effectiveness of pembrolizumab  
84 plus chemotherapy for previously untreated metastatic NSCLC without ALK or EGFR mutations from  
85 the US-payer perspective.

## 86 **2 Material and methods**

### 87 **2.1 Decision model**

88 A Markov model was built to simulate the flow process of patient morbidity, treatment, and  
89 survival for previously untreated metastatic NSCLC, using three states, namely PFS state, disease  
90 progression survival state, and death (Fig.1).All patients entranced the model in the PFS state, with  
91 the treatment of pemetrexed combined platinum plus pembrolizumab or placebo. Patients who  
92 experienced progression could receive carboplatin plus pemetrexed, docetaxel plus ramucirumab,  
93 docetaxel monotherapy, nivolumab or pembrolizumab, because these regimens were used most in

1  
2  
3  
4  
5 94 the Keynote-189 trial <sup>10</sup>. All patients were assumed to receive end-of-life care before death.

6  
7 95 Each health state was assigned a health utility from published studies. Only direct costs were  
8  
9 96 considered and adapted for 2018 US dollars using the Medical Care Consumer Price Index. All costs and  
10  
11 97 health outcomes were discounted at an annual discount rate of 3% <sup>11</sup>. The model simulated a 20-year  
12  
13 98 period and each model cycle represented 21 days because in the clinical trial patients received  
14  
15 99 pembrolizumab plus chemotherapy every 3 weeks <sup>10</sup>. The primary outputs of the Markov model included  
16  
17 100 cost and quality-adjusted life years (QALYs), which were applied to estimate the incremental  
18  
19 101 cost-effectiveness ratio (ICER). All analyses were performed in TreeAge pro 2018 software  
20  
21 102 (<https://www.treeage.com>).

## 23 103 **2.2 Model probabilities**

24  
25 104 The probability of transition of disease progression and from any state to death were from the  
26  
27 105 survival curve of pembrolizumab or placebo combined with chemotherapy in the keynote-189 trial <sup>10</sup>. We  
28  
29 106 used the GetData Graph Digitizer software (version 2.25) to extract the data points of the Kaplan-Meier  
30  
31 107 curves. According to the Akaike information criterion (AIC) and Bayesian information criterion (BIC),  
32  
33 108 the PFS data points were fitted by a Weibull distribution, and overall survival (OS) data points were fitted  
34  
35 109 with an exponential distribution <sup>12</sup>. The distribution parameters were calculated using the method of  
36  
37 110 Hoyle et al <sup>12</sup>. Finally, the PFS and OS rates of each cycle were estimated by  $\exp(-\lambda t^\gamma)$  and  $\exp(-\lambda t)$ ,  
38  
39 111 respectively, where  $\lambda$  is the scale parameter,  $\gamma$  is the shape parameter, and  $t$  is survival time (Table 1 near  
40  
41 112 here).

## 43 113 **2.3 Costs**

44  
45  
46 114 Only direct costs, including the costs of the drug, premedication, administration and management of  
47  
48 115 serious adverse events (AEs) (Table 1 near here), were considered in our evaluation. In the PFS state, the  
49  
50 116 cost of the intravenous drug for 3-week cycle was based on the following doses: pembrolizumab  
51  
52 117 200mg/cycle, pemetrexed 500mg/m<sup>2</sup>, cisplatin 75 mg/m<sup>2</sup> and carboplatin 400 mg/m<sup>2</sup>.

53  
54 118 The model considered the hospitalization cost of patients with AE  $\geq$  grade 3, and the incidence  
55  
56 119 rate exceeded 5% because these AEs were of great concern to clinicians<sup>13</sup>. And then the incidence rates of  
57  
58 120 neutropenia and pneumonia from the Keynote-189 trial, were used to calculate the cost of AEs treatments  
59  
60

1  
2  
3  
4  
5 121 <sup>10</sup>.

6  
7 122 Based on the Keynote-189 trial <sup>10</sup>, 30.5% of the patients in the pembrolizumab plus chemotherapy  
8  
9 123 group and 46.6% in the placebo plus chemotherapy group received subsequent therapy after disease  
10  
11 124 progression. Among patients in the pembrolizumab plus chemotherapy group, 3% received carboplatin  
12  
13 125 plus pemetrexed, 2.3% received docetaxel plus ramucirumab, 17.8% received docetaxel, 4% received  
14  
15 126 nivolumab and 3.4% received continuation maintenance treatment of pembrolizumab; among patients in  
16  
17 127 the placebo plus chemotherapy group, 1.7% received docetaxel, 7.8% received nivolumab and 38%  
18  
19 128 received crossover treatment with pembrolizumab. Patients who died accrued the cost of terminal care,  
20  
21 129 including hospitalization, palliative chemotherapy, doctor consultation, laboratory, and diagnostic tests,  
22  
23 130 according to the published literature <sup>14</sup>.

24  
25 131 The mean value of a body-surface area and body weight are 1.84m<sup>2</sup> and 82kg, respectively <sup>13 15</sup>. The  
26  
27 132 drug costs were taken from the Centers for Medicare and Medicaid Services<sup>16</sup>. Administration costs were  
28  
29 133 calculated according to the Medicare physician fee schedule for 2018<sup>17</sup>. The costs of AEs and end-of-life  
30  
31 134 care were derived from the published literature <sup>13</sup>.

#### 32 33 135 **2.4 Outcome measures**

34  
35  
36 136 The outcome indicator of the study was QALYs, which is defined by the patient's life years and  
37  
38 137 health utility. In accordance with the approach of Anna Oh et al <sup>18</sup>, we also considered the disutility of AE.  
39  
40 138 Baseline utility and disutility values were referenced in the published literature (Table 1 near here) <sup>19 20</sup>.

#### 41 42 139 **2.5 Analysis**

43  
44  
45 140 The uncertainty of the parameters was evaluated by one-way sensitivity analysis and probabilistic  
46  
47 141 sensitivity analysis, through the use of tornado diagrams and Monte Carlo simulation respectively. The  
48  
49 142 beta distribution was applied for the utilities, and the lognormal distribution was applied for the cost.  
50  
51 143 Utilities were varied over their 95% CIs. In general, the upper and lower limits of the parameters were  
52  
53 144 taken from the literature, and if otherwise, upper and lower limits of 25% were set. All baseline values  
54  
55 145 and ranges for variables are shown in Table 1.

#### 56 57 146 **2.6 Patient and public involvement**

58  
59  
60

1  
2  
3  
4  
5 147 No patients or public were involved in the study.  
6

### 7 148 **3 Results**

#### 9 149 **3.1 Base case analysis**

10  
11  
12  
13 150 Weibull and exponential models used to fit the survival curves from the clinical trial (supplementary  
14  
15 151 appendix 1), which show that the decision analysis model established in this study can reflect the clinical  
16  
17 152 effects very well. In the base case analysis, the lifetime cost of using pembrolizumab plus chemotherapy  
18  
19 153 was \$288,532 compared with \$137,123 for placebo plus chemotherapy. When considering effectiveness,  
20  
21 154 the pembrolizumab plus chemotherapy strategy yielded 1.61 QALYs, compared with 0.83 QALYs for the  
22  
23 155 placebo plus chemotherapy strategy. The ICER of pembrolizumab plus chemotherapy was calculated as  
24  
25 156 \$194,372/QALY compared with the placebo plus chemotherapy. When pembrolizumab cost \$12.05 and  
26  
27 157 \$31.38/mg, the ICERs approximated the WTP thresholds of \$100,000 and \$150,000/QALY, respectively  
28  
29 158 (Table2).

#### 30 31 159 **3.2 Sensitivity analysis**

32  
33  
34 160 The tornado diagrams present the results of one-way sensitivity analyses. Obviously, the cost of  
35  
36 161 pembrolizumab, the cost of subsequent treatment in the placebo-combination group and baseline utility  
37  
38 162 values of OS were the most relatively sensitive parameters, and the ICER range was from  
39  
40 163 \$149,680/QALY to \$239,065/QALY (Fig.2). The discount rate, the cost of subsequent treatment in the  
41  
42 164 pembrolizumab-combination group, the cost of pemetrexed, the baseline utility value of PFS and the cost  
43  
44 165 of AE management had little impact on the model.

45  
46 166 The cost-effectiveness acceptability curve shows the probabilistic sensitivity analysis results of  
47  
48 167 different willingness-to-pay (WTP) thresholds (Fig.3). The probability that pembrolizumab combined  
49  
50 168 with chemotherapy is cost-effective increased as WTP increased. The results showed that the probability  
51  
52 169 of pembrolizumab plus chemotherapy being cost-effective was 0% at a WTP threshold of  
53  
54 170 \$130,000/QALY. If WTP threshold is \$192,000/QALY, the pembrolizumab plus chemotherapy strategy  
55  
56 171 show a 50% chance cost-effectiveness (Fig.3).

### 57 172 **4 Discussion**

1  
2  
3  
4  
5 173 We performed a cost-effectiveness analysis of pembrolizumab in addition to chemotherapy in  
6  
7 174 previously untreated metastatic NSCLC. Based on our model, the ICER for pembrolizumab plus  
8  
9 175 chemotherapy was estimated as \$194,372/QALY compared with the placebo plus chemotherapy. The  
10  
11 176 results showed that the probability of pembrolizumab plus chemotherapy being cost-effective was 0% at a  
12  
13 177 WTP threshold of \$130,000/QALY.

14  
15 178 There are many other studies that have analyzed the cost-effectiveness of pembrolizumab for  
16  
17 179 advanced NSCLC in different setting<sup>13 14 21-24</sup>. In the KEYNOTE-024 trial, pembrolizumab demonstrated  
18  
19 180 the incremental survival benefits and better safety profile versus chemotherapy for first-line treatment of  
20  
21 181 PD-L1 -positive ( $\geq 50\%$ ) metastatic NSCLC patients<sup>25</sup>. Based on the KEYNOTE-024 trial, a US-based  
22  
23 182 study found that pembrolizumab was cost effective, with an ICER of \$97,621/QALY<sup>14</sup>, a study by  
24  
25 183 Georgieva et al. demonstrated that pembrolizumab monotherapy was cost-effective in the US but not the  
26  
27 184 UK<sup>24</sup>, a study by Hu X et al. conducted in the UK demonstrated that pembrolizumab plus chemotherapy  
28  
29 185 was not cost-effective, with an ICER of £86,913/QALY<sup>23</sup>, and a French study found that pembrolizumab  
30  
31 186 appears cost-effective<sup>22</sup>. Our results differ from the above results may be due to different health systems  
32  
33 187 and costs in different countries, which leads to different cost-effectiveness conclusions. Based on the  
34  
35 188 KEYNOTE-010 trial, a study analysed the cost-effectiveness of pembrolizumab and docetaxel as  
36  
37 189 second-line treatment for PD-L1 positive advanced NSCLC from the US third-party payer perspective.  
38  
39 190 The results showed that the ICER was \$168,619/QALY, which was cost-effective at a threshold of three  
40  
41 191 times GDP per capita (\$171,660)<sup>13</sup>. These data provide reference value for evaluating the total cost of  
42  
43 192 therapy and the value of regimens for advanced NSCLC.

44  
45 193 Our one-way sensitivity analysis revealed that the cost of pembrolizumab had a great influence on  
46  
47 194 the results of the study. High drug prices are the result of the monopoly of pharmaceutical companies and  
48  
49 195 restrictions on the negotiating power of the payer<sup>26</sup>. This can be addressed by providing more meaningful  
50  
51 196 price negotiation opportunities for payers and providing more evidence of a cost-effectiveness  
52  
53 197 comparison of treatment regimens<sup>26</sup>. We can also reduce the cost of administration by using personalized  
54  
55 198 dosing. Recent study has shown that personalized dosing (2mg/kg) and fixed dosing (200mg) of  
56  
57 199 pembrolizumab have equivalent efficacy<sup>27</sup>. Avoiding drug waste is extremely important in an era of  
58  
59 200 value-based cancer therapy<sup>27</sup>. When our study used 2 mg/kg of pembrolizumab based on the average  
60

1  
2  
3  
4  
5 201 weight of 82 kg<sup>15</sup>, the ICER was reduced to \$171,751. We believe that manufacturers are responsible for  
6  
7 202 providing multiple sizes of vials to minimize the chance of wastage.

8  
9 203 However, there are few limitations to our study that deserve consideration. First, we used cost  
10  
11 204 parameters provided by Medicare, which may be lower than private insurers<sup>28</sup>. Second, the health utility  
12  
13 205 values were taken from other data sources instead of patients who participated in the Keynote 189 trial,  
14  
15 206 which limits the accuracy of our results. Unfortunately, the clinical trial did not report the quality of life.  
16  
17 207 Third, our analysis did not estimate the costs for all AEs in the PFS state, which may lead to  
18  
19 208 underestimation of AEs costs. However, considering the low incidence, we expect the inclusion of all  
20  
21 209 AEs would not change the conclusions of the present analysis. In addition, our model applied sensitivity  
22  
23 210 analysis to a wide variation of these parameters, and it does not affect the results. Fourth, our analysis was  
24  
25 211 based on the Keynote 189 trial, which excluded patients with sensitizing EGFR or ALK translocation,  
26  
27 212 because they usually used targeted agents as first-line treatment. However in the real-world setting, these  
28  
29 213 patients with unknown EGFR or ALK translocation were also likely to be received PD-L1 testing and  
30  
31 214 treated with pembrolizumab. Finally, our study directly compared pembrolizumab plus chemotherapy  
32  
33 215 with chemotherapy according to the KEYNOTE-189 trial. Although there are other potential first-line  
34  
35 216 treatments for advanced non-small cell lung cancer, our study did not indirectly compare them because of  
36  
37 217 the lack of convincing trial data and robust head-to-head trial data.

38 218 Overall, the combination of pembrolizumab and chemotherapy for patients with metastatic NSCLC  
39  
40 219 that we studied has high incremental cost and modest incremental benefit. New treatment technology for  
41  
42 220 tumour is continuously undergoing development, but the price of tumour drugs is also rising dramatically.  
43  
44 221 Based on our analysis, pembrolizumab offers lower value at current cost. The provision of cost-effective  
45  
46 222 care requires new pricing and payment systems to support. The process for approving new drugs and the  
47  
48 223 process of incorporating them into the guidelines must balance costs and benefits, and our research can  
49  
50 224 offer decision-making information for this purpose.

51  
52 225

53  
54 226

55  
56  
57 227  
58  
59  
60

1  
2  
3  
4  
5 228 **Acknowledgements:** I certify that no individuals other than the listed co-authors contributed to this  
6  
7 229 publication.

8  
9 230 **Author Contributions:** Study concepts and design: Chongqing Tan; Clinical program: Fang Ma;  
10  
11 231 Analysis and interpretation of the data: Liubao Peng, Ye Peng, Qiao Liu; The drafting and revising of the  
12  
13 232 paper: Xiaohui Zeng and Xiaomin Wan; Final approved of manuscript: All authors; all authors agree to  
14  
15 233 be accountable for all aspects of the work.

16  
17 234 **Funding:** This work was supported by the National Natural Science Foundation of China [grant numbers  
18  
19 235 81401547, 81603081]; and the Key Science-Technology Research and Development Program of Hunan  
20  
21 236 Province [grant number 2016JC2062].

22  
23 237 **Conflict of interest:** None declared.

24  
25 238 **Data sharing statement:** No additional data available.

26  
27 239

28  
29 240

30  
31 241

32  
33 242

34  
35 243

36  
37 244

38  
39 245

40  
41 246

42  
43 247

44  
45 248

46  
47 249

48  
49 250

50  
51 251

52  
53 252

54  
55 253

56  
57 254

58  
59 255

60

256

257 **References**

- 258 1. WHO. International Agency for Research on Cancer. Estimated number of new cases in 2018,  
259 world, both sexes, all age. <http://globocan.iarc.fr>. Accessed 15 Dec 2018.
- 260 2. Nation Comprehensive Cancer Network. Non-small cell lung cancer. 2nd ed (2018).  
261 <https://www.nccn.org/>. Accessed 15 Dec 2018.
- 262 3. Peters S, Kerr KM, Stahel R. PD-1 blockade in advanced NSCLC: A focus on pembrolizumab.  
263 *Cancer Treat Rev* 2018;62:39-49. doi: 10.1016/j.ctrv.2017.10.002
- 264 4. Weiss GJ. A new era of treating advanced lung cancer is upon us. *Transl Lung Cancer Res*  
265 2018;7(Suppl 3):S202-S05. doi: 10.21037/tlcr.2018.07.03
- 266 5. Garon EB, Rizvi NA, Hui R, et al. Pembrolizumab for the treatment of non-small-cell lung cancer.  
267 *N Engl J Med* 2015;372(21):2018-28. doi: 10.1056/NEJMoa1501824
- 268 6. Scarpace SL. Metastatic squamous cell non-small-cell lung cancer (NSCLC): disrupting the drug  
269 treatment paradigm with immunotherapies. *Drugs Context* 2015;4:212289. doi: 10.7573/dic.212289
- 270 7. Armand P. Immune checkpoint blockade in hematologic malignancies. *Blood*  
271 2015;125(22):3393-400. doi: 10.1182/blood-2015-02-567453
- 272 8. Dang TO, Ogunniyi A, Barbee MS, et al. Pembrolizumab for the treatment of PD-L1 positive  
273 advanced or metastatic non-small cell lung cancer. *Expert Rev Anticancer Ther* 2016;16(1):13-20.  
274 doi: 10.1586/14737140.2016.1123626
- 275 9. Sul J, Blumenthal GM, Jiang X, et al. FDA Approval Summary: Pembrolizumab for the  
276 Treatment of Patients With Metastatic Non-Small Cell Lung Cancer Whose Tumors Express  
277 Programmed Death-Ligand 1. *Oncologist* 2016;21(5):643-50. doi: 10.1634/theoncologist.2015-0498
- 278 10. Gandhi L, Rodriguez-Abreu D, Gadgeel S, et al. Pembrolizumab plus Chemotherapy in  
279 Metastatic Non-Small-Cell Lung Cancer. *N Engl J Med* 2018;378(22):2078-92. doi:  
280 10.1056/NEJMoa1801005
- 281 11. Goldstein DA, Ahmad BB, Chen Q, et al. Cost-Effectiveness Analysis of Regorafenib for  
282 Metastatic Colorectal Cancer. *J Clin Oncol* 2015;33(32):3727-32. doi: 10.1200/JCO.2015.61.9569
- 283 12. Hoyle MW, Henley W. Improved curve fits to summary survival data: application to economic



- 1  
2  
3  
4  
5 284 evaluation of health technologies. *BMC Med Res Methodol* 2011;11:139. doi:  
6  
7 285 10.1186/1471-2288-11-139  
8  
9 286 13. Huang M, Lou Y, Pellissier J, et al. Cost-effectiveness of pembrolizumab versus docetaxel for  
10 287 the treatment of previously treated PD-L1 positive advanced NSCLC patients in the United States. *J*  
11  
12 288 *Med Econ* 2017;20(2):140-50. doi: 10.1080/13696998.2016.1230123  
13  
14 289 14. Huang M, Lou Y, Pellissier J, et al. Cost Effectiveness of Pembrolizumab vs. Standard-of-Care  
15 290 Chemotherapy as First-Line Treatment for Metastatic NSCLC that Expresses High Levels of PD-L1  
16 291 in the United States. *Pharmacoeconomics* 2017 doi: 10.1007/s40273-017-0527-z  
17  
18 292 15. Centers for Disease Control and Prevention. Faststats. <http://www.cdc.gov/nchs/fastats>.  
19 293 Accessed 15 Dec 2018.  
20  
21 294 16. Center for Medicare and Medicaid Services. 2018-July-ASP-Pricing-File(2018).  
22 295 <https://www.cms.gov/apps/ama/license.asp?File=/Medicare/Medicare-Fee-for-Service-Part-B-Drugs>  
23 296 [/McrPartBDrugAvgSalesPrice/Downloads/2018-July-ASP-Pricing-File.zip](https://www.cms.gov/apps/ama/license.asp?File=/McrPartBDrugAvgSalesPrice/Downloads/2018-July-ASP-Pricing-File.zip). Accessed 15 Dec 2018.  
24  
25 297 17. Goldstein DA, Chen Q, Ayer T, et al. First- and second-line bevacizumab in addition to  
26 298 chemotherapy for metastatic colorectal cancer: a United States-based cost-effectiveness analysis. *J*  
27 299 *Clin Oncol* 2015;33(10):1112-8. doi: 10.1200/JCO.2014.58.4904  
28  
29 300 18. Oh A, Tran DM, McDowell LC, et al. Cost-Effectiveness of Nivolumab-Ipilimumab  
30 301 Combination Therapy Compared with Monotherapy for First-Line Treatment of Metastatic  
31 302 Melanoma in the United States. *J Manag Care Spec Pharm* 2017;23(6):653-64. doi:  
32 303 10.18553/jmcp.2017.23.6.653  
33  
34 304 19. Chouaid C, Agulnik J, Goker E, et al. Health-related quality of life and utility in patients with  
35 305 advanced non-small-cell lung cancer: a prospective cross-sectional patient survey in a real-world  
36 306 setting. *J Thorac Oncol* 2013;8(8):997-1003. doi: 10.1097/JTO.0b013e318299243b [published  
37 307 Online First: 2013/06/22]  
38  
39 308 20. Nafees B, Stafford M, Gavriel S, et al. Health state utilities for non small cell lung cancer.  
40 309 *Health Qual Life Outcomes* 2008;6:84. doi: 10.1186/1477-7525-6-84 [published Online First:  
41 310 2008/10/23]  
42  
43 311 21. Liao W, Huang J, Hutton D, et al. Cost-effectiveness analysis of first-line pembrolizumab  
44  
45  
46  
47  
48  
49  
50  
51  
52  
53  
54  
55  
56  
57  
58  
59  
60

- 1  
2  
3  
4  
5 312 treatment for PD-L1 positive, non-small cell lung cancer in China. *J Med Econ* 2019;1. doi:  
6  
7 313 10.1080/13696998.2019.1570221  
8  
9 314 22. Chouaid C, Bensimon L, Clay E, et al. Cost-effectiveness analysis of pembrolizumab versus  
10  
11 315 standard-of-care chemotherapy for first-line treatment of PD-L1 positive (>50%) metastatic  
12  
13 316 squamous and non-squamous non-small cell lung cancer in France. *Lung Cancer* 2019;127:44-52.  
14  
15 317 doi: 10.1016/j.lungcan.2018.11.008  
16  
17 318 23. Hu X, Hay JW. First-line pembrolizumab in PD-L1 positive non-small-cell lung cancer: A  
18  
19 319 cost-effectiveness analysis from the UK health care perspective. *Lung Cancer* 2018;123:166-71. doi:  
20  
21 320 10.1016/j.lungcan.2018.07.012  
22  
23 321 24. Georgieva M, da Silveira Nogueira Lima JP, Aguiar P, Jr., et al. Cost-effectiveness of  
24  
25 322 pembrolizumab as first-line therapy for advanced non-small cell lung cancer. *Lung Cancer*  
26  
27 323 2018;124:248-54. doi: 10.1016/j.lungcan.2018.08.018  
28  
29 324 25. Reck M, Rodriguez-Abreu D, Robinson AG, et al. Pembrolizumab versus Chemotherapy for  
30  
31 325 PD-L1-Positive Non-Small-Cell Lung Cancer. *N Engl J Med* 2016;375(19):1823-33. doi:  
32  
33 326 10.1056/NEJMoa1606774  
34  
35 327 26. Kesselheim AS, Avorn J, Sarpatwari A. The High Cost of Prescription Drugs in the United  
36  
37 328 States: Origins and Prospects for Reform. *Jama* 2016;316(8):858-71. doi: 10.1001/jama.2016.11237  
38  
39 329 27. Goldstein DA, Gordon N, Davidescu M, et al. A Pharmacoeconomic Analysis of Personalized  
40  
41 330 Dosing vs Fixed Dosing of Pembrolizumab in Firstline PD-L1-Positive Non-Small Cell Lung  
42  
43 331 Cancer. *J Natl Cancer Inst* 2017;109(11) doi: 10.1093/jnci/djx063  
44  
45 332 28. Medicare Payment Advisory Commission. March 2018 Report To the Congress: Medicare  
46  
47 333 Payment Policy. <http://www.medpac.gov/-documents-/reports>. Accessed 15 Dec 2018.  
48  
49  
50  
51  
52  
53  
54  
55  
56  
57  
58  
59  
60

335 Table 1 Parameters for Cost Effectiveness Model

| Parameter                                           | Pembrolizumab |             | Placebo |             | Distribution |
|-----------------------------------------------------|---------------|-------------|---------|-------------|--------------|
|                                                     | Value         | Ranges      | Value   | Ranges      |              |
| Probabilities                                       |               |             |         |             |              |
| PFS (Weibull)                                       |               |             |         |             |              |
| Scale( $\lambda$ )                                  | 0.0448        |             | 0.0876  |             |              |
| Shape( $\gamma$ )                                   | 1.2675        |             | 1.2312  |             |              |
| OS(exponential)                                     |               |             |         |             |              |
| Scale( $\lambda$ )                                  | 0.0290        |             | 0.0586  |             |              |
| Costs (\$)                                          |               |             |         |             |              |
| Pembrolizumab/mg <sup>16</sup>                      | 48.57         | +/- 25%     | 48.57   | +/- 25%     | Lognorm      |
| Pemetrexed/mg <sup>16</sup>                         | 6.75          | +/- 25%     | 6.75    | +/- 25%     | Lognorm      |
| Cisplatin/mg <sup>16</sup>                          | 0.20          | +/- 25%     | 0.20    | +/- 25%     | Lognorm      |
| Carboplatin/mg <sup>16</sup>                        | 0.06          | +/- 25%     | 0.06    | +/- 25%     | Lognorm      |
| Chemotherapy infusion 1 hour <sup>16</sup>          | 145           | +/- 25%     | 145     | +/- 25%     | Lognorm      |
| Chemotherapy infusion additional hour <sup>16</sup> | 32            | +/- 25%     | 32      | +/- 25%     | Lognorm      |
| Subsequent therapies/cycle <sup>16</sup>            | 1160          | +/- 25%     | 4394    | +/- 25%     | Lognorm      |
| End-of-life care <sup>14</sup>                      | 33009         | +/- 25%     | 33009   | +/- 25%     | Lognorm      |
| AE hospitalization cost <sup>13</sup>               | 3538          | +/- 50%     | 3005    | +/-50%      | Lognorm      |
| Baseline utilities                                  |               |             |         |             |              |
| PFS <sup>19</sup>                                   | 0.71          | 0.67–0.76   | 0.71    | 0.67–0.76   | Beta         |
| disease progression survival <sup>19</sup>          | 0.67          | 0.59–0.75   | 0.67    | 0.59–0.75   | Beta         |
| Disutilities                                        |               |             |         |             |              |
| Neutropenia <sup>20</sup>                           | 0.09          | 0.060-0.119 | 0.09    | 0.060-0.119 | Beta         |
| Pneumonia <sup>20</sup>                             | 0.09          | 0.059-0.121 | 0.09    | 0.059-0.121 | Beta         |

336 PFS: progression-free survival; OS: overall survival; AE: adverse effect.

337

338 Table 2 Pembrolizuman plus Chemotherapy Cost-Effectiveness at Additional Modeled Price Points

| Parameter             | Base-Case Model Analysis* |        |
|-----------------------|---------------------------|--------|
| WTP value, \$/QALY    | 100000                    | 15000  |
| Nivolumab cost, \$/mg | 12.05                     | 31.38  |
| Total cost, \$        | 176197                    | 235651 |
| QALYs                 | 1.61                      | 1.61   |
| ICER, \$/QALY         | 99915                     | 149907 |

339 ICER: incremental cost-effectiveness ratio; QALY: quality-adjusted life-year; WTP: Willingness-to-pay.

340 \* Only the cost of pembrolizumab was varied.

341

342

343

344

345

346

347

348

349

350

351

352

353

354

355

356

357

358

359

1  
2  
3  
4  
5 360 **Fig.1** State transition diagram. The three circles show three main health states. Patients can transition  
6  
7 361 from “progression-free survival” to “disease progression survival” or “death”

8  
9 362

10 363 **Fig.2** Tornado diagrams. The graphic shows the impact of varying individual model inputs on the  
11  
12 364 cost-effectiveness of pembrolizumab plus chemotherapy for metastatic NSCLC. ICER: incremental  
13  
14 365 cost-effectiveness ratio. NSCLC: non-small cell lung cancer

15  
16 366

17  
18 367 **Fig.3** Cost-effectiveness acceptability curve. This plot represents the results of a probabilistic sensitivity  
19  
20 368 analysis (for details, see Methods) comparing the cost-effectiveness of  
21  
22 369 pembrolizumab-pemetrexed-platinum versus placebo-pemetrexed-platinum in metastatic NSCLC. CE:  
23  
24 370 cost-effectiveness. NSCLC: non-small cell lung cancer

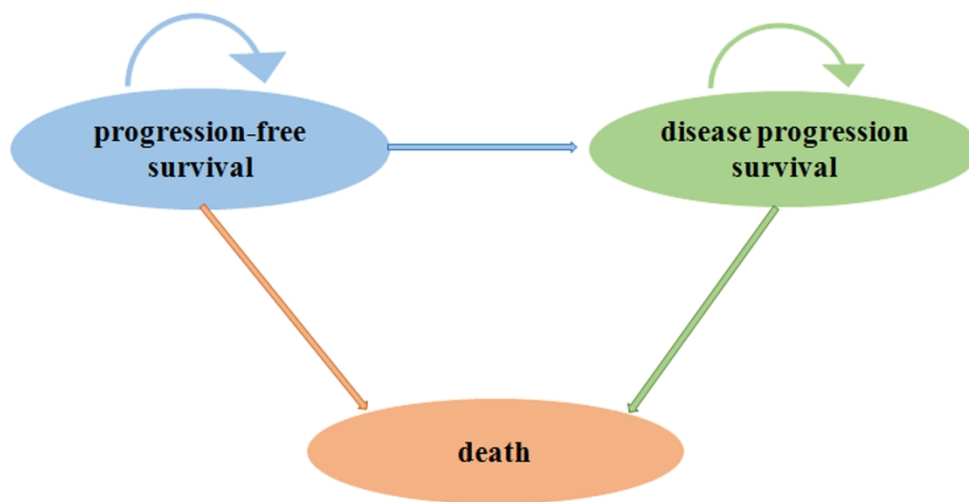

Fig.1 State transition diagram. The three circles show three main health states. Patients can transition from "progression-free survival" to "disease progression survival" or "death"

82x45mm (600 x 600 DPI)

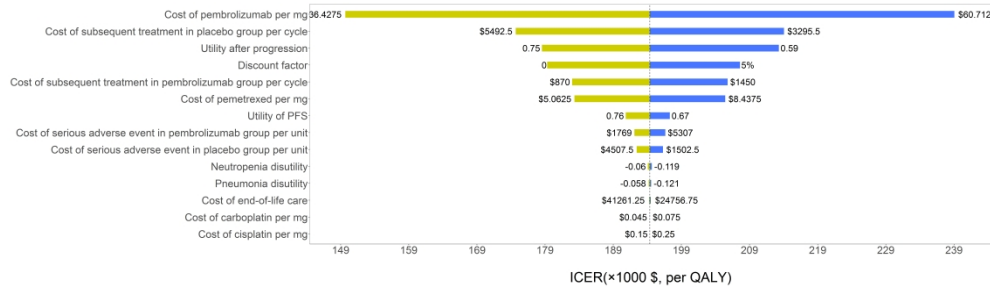

Fig.2 Tornado diagrams. The graphic shows the impact of varying individual model inputs on the cost-effectiveness of pembrolizumab plus chemotherapy for metastatic NSCLC. ICER: incremental cost-effectiveness ratio. NSCLC: non-small cell lung cancer

889x254mm (300 x 300 DPI)



Fig.3 Cost-effectiveness acceptability curve. This plot represents the results of a probabilistic sensitivity analysis (for details, see Methods) comparing the cost-effectiveness of pembrolizumab-pemetrexed-platinum versus placebo-pemetrexed-platinum in metastatic NSCLC. CE: cost-effectiveness. NSCLC: non-small cell lung cancer

169x104mm (600 x 600 DPI)



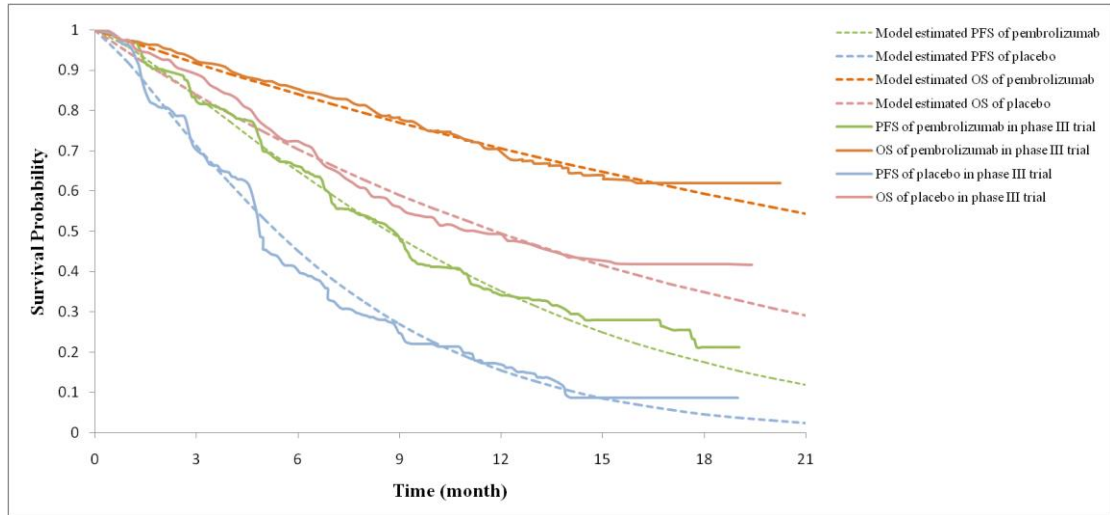

**Supplementary appendix 1.** Survival curves. PFS and OS were fitted with Weibull and exponential model, respectively, according to the original curves shown in clinical trials. PFS: progression-free survival; OS: overall survival.

## Consolidated Health Economic Evaluation Reporting Standards – CHEERS Checklist 1

**CHEERS Checklist****Items to include when reporting economic evaluations of health interventions**

The **ISPOR CHEERS Task Force Report**, *Consolidated Health Economic Evaluation Reporting Standards (CHEERS)—Explanation and Elaboration: A Report of the ISPOR Health Economic Evaluations Publication Guidelines Good Reporting Practices Task Force*, provides examples and further discussion of the 24-item CHEERS Checklist and the CHEERS Statement. It may be accessed via the *Value in Health* or via the ISPOR Health Economic Evaluation Publication Guidelines – CHEERS: Good Reporting Practices webpage: <http://www.ispor.org/TaskForces/EconomicPubGuidelines.asp>

| Section                         | Item No | Recommendation                                                                                                                                                                          | Reported on page No/line No |
|---------------------------------|---------|-----------------------------------------------------------------------------------------------------------------------------------------------------------------------------------------|-----------------------------|
| <b>Title and Abstract</b>       |         |                                                                                                                                                                                         |                             |
| Title                           | 1       | Identify the study as an economic evaluation or use more specific terms such as “cost-effectiveness analysis”, and describe the interventions compared.                                 | P1/L1-2                     |
| Abstract                        | 2       | Provide a structured summary of objectives, perspective, setting, methods (including study design and inputs), results (including base case and uncertainty analyses), and conclusions. | P2/L33-45                   |
| <b>Introduction</b>             |         |                                                                                                                                                                                         |                             |
| Background and objectives       | 3       | Provide an explicit statement of the broader context for the study.<br>Present the study question and its relevance for health policy or practice decisions.                            | P2-3/L58-76                 |
| <b>Methods</b>                  |         |                                                                                                                                                                                         |                             |
| Target population and subgroups | 4       | Describe characteristics of the base case population and subgroups analysed, including why they were chosen.                                                                            | P3/L79-80                   |
| Setting and location            | 5       | State relevant aspects of the system(s) in which the decision(s) need(s) to be made.                                                                                                    | P3/L81-85                   |
| Study perspective               | 6       | Describe the perspective of the study and relate this to the costs being evaluated.                                                                                                     | P3/L76                      |
| Comparators                     | 7       | Describe the interventions or strategies being compared and state why they were chosen.                                                                                                 | P3/L82                      |
| Time horizon                    | 8       | State the time horizon(s) over which costs and consequences are being evaluated and say why appropriate.                                                                                | P3/L88-89                   |
| Discount rate                   | 9       | Report the choice of discount rate(s) used for costs and outcomes and say why appropriate.                                                                                              | P3/L88                      |
| Choice of health outcomes       | 10      | Describe what outcomes were used as the measure(s) of benefit in the evaluation and their relevance for the type of analysis performed.                                                 | P3/L90-91                   |
| Measurement of effectiveness    | 11a     | <i>Single study-based estimates</i> : Describe fully the design features of the single effectiveness study and why the single                                                           |                             |

## Consolidated Health Economic Evaluation Reporting Standards – CHEERS Checklist 2

|                                                        |     |                                                                                                                                                                                                                                                                                                                                                       |               |
|--------------------------------------------------------|-----|-------------------------------------------------------------------------------------------------------------------------------------------------------------------------------------------------------------------------------------------------------------------------------------------------------------------------------------------------------|---------------|
|                                                        |     | study was a sufficient source of clinical effectiveness data.                                                                                                                                                                                                                                                                                         |               |
|                                                        | 11b | <i>Synthesis-based estimates</i> : Describe fully the methods used for identification of included studies and synthesis of clinical effectiveness data.                                                                                                                                                                                               | P5/L126-130   |
| Measurement and valuation of preference based outcomes | 12  | If applicable, describe the population and methods used to elicit preferences for outcomes.                                                                                                                                                                                                                                                           |               |
| Estimating resources and costs                         | 13a | <i>Single study-based economic evaluation</i> : Describe approaches used to estimate resource use associated with the alternative interventions. Describe primary or secondary research methods for valuing each resource item in terms of its unit cost. Describe any adjustments made to approximate to opportunity costs.                          |               |
|                                                        | 13b | <i>Model-based economic evaluation</i> : Describe approaches and data sources used to estimate resource use associated with model health states. Describe primary or secondary research methods for valuing each resource item in terms of its unit cost. Describe any adjustments made to approximate to opportunity costs.                          | P4-5/L104-125 |
| Currency, price date, and conversion                   | 14  | Report the dates of the estimated resource quantities and unit costs. Describe methods for adjusting estimated unit costs to the year of reported costs if necessary. Describe methods for converting costs into a common currency base and the exchange rate.                                                                                        | P3/L86-87     |
| Choice of model                                        | 15  | Describe and give reasons for the specific type of decision-analytical model used. Providing a figure to show model structure is strongly recommended.                                                                                                                                                                                                | P3/L79        |
| Assumptions                                            | 16  | Describe all structural or other assumptions underpinning the decision-analytical model.                                                                                                                                                                                                                                                              | P3/L80-85     |
| Analytical methods                                     | 17  | Describe all analytical methods supporting the evaluation. This could include methods for dealing with skewed, missing, or censored data; extrapolation methods; methods for pooling data; approaches to validate or make adjustments (such as half cycle corrections) to a model; and methods for handling population heterogeneity and uncertainty. | P5/L131-137   |
| <b>Results</b>                                         |     |                                                                                                                                                                                                                                                                                                                                                       |               |
| Study parameters                                       | 18  | Report the values, ranges, references, and, if used, probability distributions for all parameters. Report reasons or sources for distributions used to represent uncertainty where appropriate. Providing a table to show the input values is strongly recommended.                                                                                   | P12/L321      |
| Incremental costs and outcomes                         | 19  | For each intervention, report mean values for the main categories of estimated costs and outcomes of interest, as well as mean differences between the comparator groups. If                                                                                                                                                                          | P5/L139-144   |

## Consolidated Health Economic Evaluation Reporting Standards – CHEERS Checklist 3

|                                                                      |     |                                                                                                                                                                                                                                                                              |                |
|----------------------------------------------------------------------|-----|------------------------------------------------------------------------------------------------------------------------------------------------------------------------------------------------------------------------------------------------------------------------------|----------------|
|                                                                      |     | applicable, report incremental cost-effectiveness ratios.                                                                                                                                                                                                                    |                |
| Characterizing uncertainty                                           | 20a | <i>Single study-based economic evaluation</i> : Describe the effects of sampling uncertainty for the estimated incremental cost and incremental effectiveness parameters, together with the impact of methodological assumptions (such as discount rate, study perspective). |                |
|                                                                      | 20b | <i>Model-based economic evaluation</i> : Describe the effects on the results of uncertainty for all input parameters, and uncertainty related to the structure of the model and assumptions.                                                                                 | P6/L145-157    |
| Characterizing heterogeneity                                         | 21  | If applicable, report differences in costs, outcomes, or cost-effectiveness that can be explained by variations between subgroups of patients with different baseline characteristics or other observed variability in effects that are not reducible by more information.   |                |
| <b>Discussion</b>                                                    |     |                                                                                                                                                                                                                                                                              |                |
| Study findings, limitations, generalizability, and current knowledge | 22  | Summarise key study findings and describe how they support the conclusions reached. Discuss limitations and the generalisability of the findings and how the findings fit with current knowledge.                                                                            | P6-P8/L158-202 |
| <b>Other</b>                                                         |     |                                                                                                                                                                                                                                                                              |                |
| Source of funding                                                    | 23  | Describe how the study was funded and the role of the funder in the identification, design, conduct, and reporting of the analysis. Describe other non-monetary sources of support.                                                                                          | P8/L210-212    |
| Conflicts of interest                                                | 24  | Describe any potential for conflict of interest of study contributors in accordance with journal policy. In the absence of a journal policy, we recommend authors comply with International Committee of Medical Journal Editors recommendations.                            | P8/L213        |

For consistency, the CHEERS Statement checklist format is based on the format of the CONSORT statement checklist

The **ISPOR CHEERS Task Force Report** provides examples and further discussion of the 24-item CHEERS Checklist and the CHEERS Statement. It may be accessed via the *Value in Health* link or via the ISPOR Health Economic Evaluation Publication Guidelines – CHEERS: Good Reporting Practices webpage: <http://www.ispor.org/TaskForces/EconomicPubGuidelines.asp>

The citation for the CHEERS Task Force Report is:  
 Husereau D, Drummond M, Petrou S, et al. Consolidated health economic evaluation reporting standards (CHEERS)—Explanation and elaboration: A report of the ISPOR health economic evaluations publication guidelines good reporting practices task force. *Value Health* 2013;16:231-50.

# BMJ Open

## Cost-effectiveness analysis of pembrolizumab plus chemotherapy for previously untreated metastatic non-small-cell lung cancer in the United States

|                                 |                                                                                                                                                                                                                                                                                       |
|---------------------------------|---------------------------------------------------------------------------------------------------------------------------------------------------------------------------------------------------------------------------------------------------------------------------------------|
| Journal:                        | <i>BMJ Open</i>                                                                                                                                                                                                                                                                       |
| Manuscript ID                   | bmjopen-2019-031019.R2                                                                                                                                                                                                                                                                |
| Article Type:                   | Original research                                                                                                                                                                                                                                                                     |
| Date Submitted by the Author:   | 12-Nov-2019                                                                                                                                                                                                                                                                           |
| Complete List of Authors:       | Zeng, Xiaohui ; Second Xiangya Hospital<br>Wan, Xiaomin; Second Xiangya Hospital<br>Peng, Liubao; Second Xiangya Hospital<br>Peng, Ye; Second Xiangya Hospital<br>Ma, Fang; Second Xiangya Hospital<br>Liu, Qiao; Second Xiangya Hospital<br>Tan, Chongqing; Second Xiangya Hospital, |
| <b>Primary Subject Heading</b>: | Health economics                                                                                                                                                                                                                                                                      |
| Secondary Subject Heading:      | Oncology                                                                                                                                                                                                                                                                              |
| Keywords:                       | Immunology < BASIC SCIENCES, CHEMOTHERAPY, HEALTH ECONOMICS                                                                                                                                                                                                                           |
|                                 |                                                                                                                                                                                                                                                                                       |

SCHOLARONE™  
Manuscripts

1  
2  
3  
4 **1 Cost-effectiveness analysis of pembrolizumab plus chemotherapy for previously**  
5 **2 untreated metastatic non-small-cell lung cancer in the United States**

6  
7  
8  
9 3 *Xiaohui Zeng<sup>c,§</sup>, Xiaomin Wan<sup>a,§</sup>, Liubao Peng<sup>a</sup>, Ye Peng<sup>a</sup>, Fang Ma<sup>b</sup>, Qiao Liu<sup>a</sup>, Chongqing Tan<sup>a,\*</sup>*

10  
11  
12 4 <sup>§</sup>Xiaohui Zeng and Xiaomin Wan contributed equally to this work.

13  
14  
15 5 <sup>a</sup> Department of Pharmacy, The Second Xiangya Hospital, Central South University, Changsha, Hunan  
16 410011, China

17  
18  
19 6 <sup>b</sup> Department of Oncology, The Second Xiangya Hospital, Central South University, Changsha, Hunan  
20 410011, China

21  
22  
23 7 <sup>c</sup> PET-CT Center, The Second Xiangya Hospital, Central South University, Changsha, Hunan 410011,  
24 China

25  
26  
27  
28 8 **\*Author for correspondence:** Chongqing Tan. Department of Pharmacy, The Second Xiangya Hospital,  
29 Central South University, Changsha, Hunan 410011, China. Tel: +86073185292094. Email:  
30 [tanchongqing@csu.edu.cn](mailto:tanchongqing@csu.edu.cn).  
31  
32  
33

34  
35 9 **Word count:** 1821.  
36  
37  
38  
39  
40  
41  
42  
43  
44  
45  
46  
47  
48  
49  
50  
51  
52  
53  
54  
55  
56  
57  
58  
59  
60

## 33 Abstract

34 **Objectives:** Evaluating the cost-effectiveness of pembrolizumab plus standard chemotherapy in the  
35 first-line setting for patients with metastatic non-small cell lung cancer (NSCLC) from the US-payer  
36 perspective.

37 **Design:** A Markov model was constructed to analyse the cost-effectiveness of pembrolizumab plus  
38 chemotherapy in the first-line treatment of metastatic NSCLC. Health outcomes were estimated in  
39 quality-adjusted life-years (QALYs). The cost information was from Medicare in 2018. One-way and  
40 probabilistic sensitivity analyses examined the impact of uncertainty and assumptions on the results.

41 **Setting:** The US-payer perspective.

42 **Participants:** A hypothetical US cohort of patients with previously untreated metastatic nonsquamous  
43 NSCLC without EGFR or ALK mutations.

44 **Interventions:** Pembrolizumab plus chemotherapy versus chemotherapy.

45 **Primary outcome measures:** Costs, QALYs, incremental cost-effectiveness ratio (ICER) of  
46 pembrolizumab plus chemotherapy expressed as cost per QALY gained compared with chemotherapy

47 **Results:** The base-case analysis demonstrated that pembrolizumab plus chemotherapy provided an  
48 additional 0.78 QALYs at incremental cost of \$151,409, resulting in an ICER of \$194,372/QALY. The  
49 ICER for pembrolizumab plus chemotherapy was > \$149,680/QALY in all of our univariable and  
50 probabilistic sensitivity analyses.

51 **Conclusions:** Pembrolizumab in addition to chemotherapy provides modest incremental benefit at high  
52 incremental cost per QALY for the treatment of previously untreated metastatic NSCLC.

## 54 Article Summary

- 55 1. The study strengths of this model-based economic assessment include that it is based on rigorous  
56 randomized controlled trials.
- 57 2. From a US payer perspective, the cost and outcome data included in the model are collected for  
58 analysis.
- 59 3. The limitation of this study is that because of the limited time scale of the model and the lack of  
60 long-term data, not all potential outcomes are included.

## 67 **1 Introduction**

68 Globally, lung cancer had an incidence rate of 27.4 per 100,000 and a mortality rate of 23.1 per  
69 100,000 in 2018 <sup>1</sup>, and non-small cell lung cancer (NSCLC) accounted for the vast majority of these cases  
70 <sup>2</sup>. Multiple drug regimens are available for the treatment of advanced NSCLC, including platinum based  
71 combination chemotherapy, anaplastic lymphoma kinase (ALK) tyrosine kinase inhibitor (TKI),  
72 epidermal growth factor receptor (EGFR)TKI and immune checkpoint inhibitors<sup>2</sup>. Immune checkpoint  
73 inhibitors showed higher efficacy and less toxicity compared to other therapies <sup>3</sup>.

74 A new era of treating advanced NSCLC is upon us after the emergence of immunosuppressive  
75 agents <sup>4</sup>. Immune checkpoint inhibitors improve antitumor immunity by inhibiting programmed death  
76 1(PD-1) receptor or programmed cell death ligand 1 (PD-L1) <sup>2 5-7</sup>. Pembrolizumab, a PD-1 inhibitor, was  
77 approved by the US Food and Drug Administration (FDA) for treatment of advanced NSCLC in 2015 <sup>8</sup>  
78 <sup>9</sup>.The Keynote-189 clinical trial showed pembrolizumab in combination with pemetrexed plus carboplatin  
79 or cisplatin could extended progression-free survival (PFS) by 3.9 months for patients with metastatic  
80 NSCLC without sensitizing ALK or EGFR mutations <sup>10</sup>.

81 Although pembrolizumab plus chemotherapy improved survival significantly, the additional cost  
82 was notably high. Therefore, it is worth discussing whether pembrolizumab plus chemotherapy is a  
83 cost-effective regimen. The goal of this study was to analyse the cost-effectiveness of pembrolizumab  
84 plus chemotherapy for previously untreated metastatic NSCLC without ALK or EGFR mutations from  
85 the US-payer perspective.

## 86 **2 Material and methods**

### 87 **2.1 Decision model**

88 A Markov model was built to simulate the flow process of patient morbidity, treatment, and  
89 survival for previously untreated metastatic NSCLC, using three states, namely PFS state, disease  
90 progression survival state, and death (Fig.1).All patients entranced the model in the PFS state, with  
91 the treatment of pemetrexed combined platinum plus pembrolizumab or placebo. Patients who  
92 experienced progression could receive carboplatin plus pemetrexed, docetaxel plus ramucirumab,  
93 docetaxel monotherapy, nivolumab or pembrolizumab, because these regimens were used most in



1  
2  
3  
4  
5 94 the Keynote-189 trial <sup>10</sup>. All patients were assumed to receive end-of-life care before death.

6  
7 95 Each health state was assigned a health utility from published studies. Only direct costs were  
8  
9 96 considered and adapted for 2018 US dollars using the Medical Care Consumer Price Index. All costs and  
10  
11 97 health outcomes were discounted at an annual discount rate of 3% <sup>11</sup>. The model simulated a 20-year  
12  
13 98 period and each model cycle represented 21 days because in the clinical trial patients received  
14  
15 99 pembrolizumab plus chemotherapy every 3 weeks <sup>10</sup>. The primary outputs of the Markov model included  
16  
17 100 cost and quality-adjusted life years (QALYs), which were applied to estimate the incremental  
18  
19 101 cost-effectiveness ratio (ICER). All analyses were performed in TreeAge pro 2018 software  
20  
21 102 (<https://www.treeage.com>).

## 23 103 **2.2 Model probabilities**

24  
25 104 The probability of transition of disease progression and from any state to death were from the  
26  
27 105 survival curve of pembrolizumab or placebo combined with chemotherapy in the keynote-189 trial <sup>10</sup>. We  
28  
29 106 used the GetData Graph Digitizer software (version 2.25) to extract the data points of the Kaplan-Meier  
30  
31 107 curves. According to the Akaike information criterion (AIC) and Bayesian information criterion (BIC),  
32  
33 108 the PFS data points were fitted by a Weibull distribution, and overall survival (OS) data points were fitted  
34  
35 109 with an exponential distribution <sup>12</sup>. The distribution parameters were calculated using the method of  
36  
37 110 Hoyle et al <sup>12</sup>. Finally, the PFS and OS rates of each cycle were estimated by  $\exp(-\lambda t^\gamma)$  and  $\exp(-\lambda t)$ ,  
38  
39 111 respectively, where  $\lambda$  is the scale parameter,  $\gamma$  is the shape parameter, and  $t$  is survival time (Table 1 near  
40  
41 112 here).

## 43 113 **2.3 Costs**

44  
45  
46 114 Only direct costs, including the costs of the drug, premedication, administration and management of  
47  
48 115 serious adverse events (AEs) (Table 1 near here), were considered in our evaluation. In the PFS state, the  
49  
50 116 cost of the intravenous drug for 3-week cycle was based on the following doses: pembrolizumab  
51  
52 117 200mg/cycle, pemetrexed 500mg/m<sup>2</sup>, cisplatin 75 mg/m<sup>2</sup> and carboplatin 400 mg/m<sup>2</sup>.

53  
54 118 The model considered the hospitalization cost of patients with AE  $\geq$  grade 3, and the incidence  
55  
56 119 rate exceeded 5% because these AEs were of great concern to clinicians<sup>13</sup>. And then the incidence rates of  
57  
58 120 neutropenia and pneumonia from the Keynote-189 trial, were used to calculate the cost of AEs treatments  
59  
60

1  
2  
3  
4  
5 121 <sup>10</sup>.

6  
7 122 Based on the Keynote-189 trial <sup>10</sup>, 30.5% of the patients in the pembrolizumab plus chemotherapy  
8  
9 123 group and 46.6% in the placebo plus chemotherapy group received subsequent therapy after disease  
10  
11 124 progression. Among patients in the pembrolizumab plus chemotherapy group, 3% received carboplatin  
12  
13 125 plus pemetrexed, 2.3% received docetaxel plus ramucirumab, 17.8% received docetaxel, 4% received  
14  
15 126 nivolumab and 3.4% received continuation maintenance treatment of pembrolizumab; among patients in  
16  
17 127 the placebo plus chemotherapy group, 1.7% received docetaxel, 7.8% received nivolumab and 38%  
18  
19 128 received crossover treatment with pembrolizumab. Patients who died accrued the cost of terminal care,  
20  
21 129 including hospitalization, palliative chemotherapy, doctor consultation, laboratory, and diagnostic tests,  
22  
23 130 according to the published literature <sup>14</sup>.

24  
25 131 The mean value of a body-surface area and body weight are 1.84m<sup>2</sup> and 82kg, respectively <sup>13 15</sup>. The  
26  
27 132 drug costs were taken from the Centers for Medicare and Medicaid Services<sup>16</sup>. Administration costs were  
28  
29 133 calculated according to the Medicare physician fee schedule for 2018<sup>17</sup>. The costs of AEs and end-of-life  
30  
31 134 care were derived from the published literature <sup>13</sup>.

## 32 135 **2.4 Outcome measures**

33  
34  
35  
36 136 The outcome indicator of the study was QALYs, which is defined by the patient's life years and  
37  
38 137 health utility. In accordance with the approach of Anna Oh et al <sup>18</sup>, we also considered the disutility of AE.  
39  
40 138 Baseline utility and disutility values were referenced in the published literature (Table 1 near here) <sup>19 20</sup>.

## 41 42 139 **2.5 Analysis**

43  
44  
45 140 The uncertainty of the parameters was evaluated by one-way sensitivity analysis and probabilistic  
46  
47 141 sensitivity analysis, through the use of tornado diagrams and Monte Carlo simulation respectively. The  
48  
49 142 beta distribution was applied for the utilities, and the lognormal distribution was applied for the cost.  
50  
51 143 Utilities were varied over their 95% CIs. In general, the upper and lower limits of the parameters were  
52  
53 144 taken from the literature, and if otherwise, upper and lower limits of 25% were set. All baseline values  
54  
55 145 and ranges for variables are shown in Table 1.

## 56 57 146 **2.6 Patient and public involvement**

1  
2  
3  
4  
5 147 No patients or public were involved in the study.  
6

7 148 **3 Results**  
8

9  
10 149 **3.1 Base case analysis**  
11

12  
13 150 Weibull and exponential models used to fit the survival curves from the clinical trial (supplementary  
14  
15 151 appendix 1), which show that the decision analysis model established in this study can reflect the clinical  
16  
17 152 effects very well. In the base case analysis, the lifetime cost of using pembrolizumab plus chemotherapy  
18  
19 153 was \$288,532 compared with \$137,123 for placebo plus chemotherapy. When considering effectiveness,  
20  
21 154 the pembrolizumab plus chemotherapy strategy yielded 1.61 QALYs, compared with 0.83 QALYs for the  
22  
23 155 placebo plus chemotherapy strategy. The ICER of pembrolizumab plus chemotherapy was calculated as  
24  
25 156 \$194,372/QALY compared with the placebo plus chemotherapy. When pembrolizumab cost \$12.05 and  
26  
27 157 \$31.38/mg, the ICERs approximated the WTP thresholds of \$100,000 and \$150,000/QALY, respectively  
28  
29 158 (Table2).  
30

31 159 **3.2 Sensitivity analysis**  
32

33  
34 160 The tornado diagrams present the results of one-way sensitivity analyses. Obviously, the cost of  
35  
36 161 pembrolizumab, the cost of subsequent treatment in the placebo-combination group and baseline utility  
37  
38 162 values of OS were the most relatively sensitive parameters, and the ICER range was from  
39  
40 163 \$149,680/QALY to \$239,065/QALY (Fig.2). The discount rate, the cost of subsequent treatment in the  
41  
42 164 pembrolizumab-combination group, the cost of pemetrexed, the baseline utility value of PFS and the cost  
43  
44 165 of AE management had little impact on the model.  
45

46 166 The cost-effectiveness acceptability curve shows the probabilistic sensitivity analysis results of  
47  
48 167 different willingness-to-pay (WTP) thresholds (Fig.3). The probability that pembrolizumab combined  
49  
50 168 with chemotherapy is cost-effective increased as WTP increased. The results showed that the probability  
51  
52 169 of pembrolizumab plus chemotherapy being cost-effective was 0% at a WTP threshold of  
53  
54 170 \$130,000/QALY. If WTP threshold is \$192,000/QALY, the pembrolizumab plus chemotherapy strategy  
55  
56 171 show a 50% chance cost-effectiveness (Fig.3).  
57

58 172 The results of the subgroup analysis showed that pembrolizumab combined with chemotherapy was  
59  
60 173 the most cost-effective (36%) for patients who had never smoked at a WTP threshold of \$100,000. When

1  
2  
3  
4 174 the WTP threshold was \$150,000, the probability of pembrolizumab combined with chemotherapy being  
5 175 cost-effective in the subgroup of never-smoking and female patients was 100% (Supplementary Appendix  
6 176 2).

#### 9 177 **4 Discussion**

10  
11  
12 178 We performed a cost-effectiveness analysis of pembrolizumab in addition to chemotherapy in  
13  
14 179 previously untreated metastatic NSCLC. Based on our model, the ICER for pembrolizumab plus  
15  
16 180 chemotherapy was estimated as \$194,372/QALY compared with the placebo plus chemotherapy. The  
17  
18 181 results showed that the probability of pembrolizumab plus chemotherapy being cost-effective was 0% at a  
19  
20 182 WTP threshold of \$130,000/QALY.

21  
22 183 There are many other studies that have analyzed the cost-effectiveness of pembrolizumab for  
23  
24 184 advanced NSCLC in different setting<sup>13 14 21-24</sup>. In the KEYNOTE-024 trial, pembrolizumab demonstrated  
25  
26 185 the incremental survival benefits and better safety profile versus chemotherapy for first-line treatment of  
27  
28 186 PD-L1 -positive ( $\geq 50\%$ ) metastatic NSCLC patients<sup>25</sup>, Based on the KEYNOTE-024 trial, a US-based  
29  
30 187 study found that pembrolizumab was cost effective, with an ICER of \$97,621/QALY<sup>14</sup>, a study by  
31  
32 188 Georgieva et al. demonstrated that pembrolizumab monotherapy was cost-effective in the US but not the  
33  
34 189 UK<sup>24</sup>, a study by Hu X et al. conducted in the UK demonstrated that pembrolizumab plus chemotherapy  
35  
36 190 was not cost-effective, with an ICER of £86,913/QALY<sup>23</sup>, and a French study found that pembrolizumab  
37  
38 191 appears cost-effective<sup>22</sup>. Our results differ from the above results may be due to different health systems  
39  
40 192 and costs in different countries, which leads to different cost-effectiveness conclusions. Based on the  
41  
42 193 KEYNOTE-010 trial, a study analysed the cost-effectiveness of pembrolizumab and docetaxel as  
43  
44 194 second-line treatment for PD-L1 positive advanced NSCLC from the US third-party payer perspective.  
45  
46 195 The results showed that the ICER was \$168,619/QALY, which was cost-effective at a threshold of three  
47  
48 196 times GDP per capita (\$171,660)<sup>13</sup>. These data provide reference value for evaluating the total cost of  
49  
50 197 therapy and the value of regimens for advanced NSCLC.

51 198 Our one-way sensitivity analysis revealed that the cost of pembrolizumab had a great influence on  
52  
53 199 the results of the study. High drug prices are the result of the monopoly of pharmaceutical companies and  
54  
55 200 restrictions on the negotiating power of the payer<sup>26</sup>. This can be addressed by providing more meaningful  
56  
57 201 price negotiation opportunities for payers and providing more evidence of a cost-effectiveness  
58  
59 202 comparison of treatment regimens<sup>26</sup>. We can also reduce the cost of administration by using personalized  
60

1  
2  
3  
4  
5 203 dosing. Recent study has shown that personalized dosing (2mg/kg) and fixed dosing (200mg) of  
6  
7 204 pembrolizumab have equivalent efficacy <sup>27</sup>. Avoiding drug waste is extremely important in an era of  
8  
9 205 value-based cancer therapy <sup>27</sup>. When our study used 2 mg/kg of pembrolizumab based on the average  
10  
11 206 weight of 82 kg <sup>15</sup>, the ICER was reduced to \$171,751. We believe that manufacturers are responsible for  
12  
13 207 providing multiple sizes of vials to minimize the chance of wastage.

14  
15 208 However, there are few limitations to our study that deserve consideration. First, we used cost  
16  
17 209 parameters provided by Medicare, which may be lower than private insurers <sup>28</sup>. Second, the health utility  
18  
19 210 values were taken from other data sources instead of patients who participated in the Keynote 189 trial,  
20  
21 211 which limits the accuracy of our results. Unfortunately, the clinical trial did not report the quality of life.  
22  
23 212 Third, our analysis did not estimate the costs for all AEs in the PFS state, which may lead to  
24  
25 213 underestimation of AEs costs. However, considering the low incidence, we expect the inclusion of all  
26  
27 214 AEs would not change the conclusions of the present analysis. In addition, our model applied sensitivity  
28  
29 215 analysis to a wide variation of these parameters, and it does not affect the results. Fourth, our analysis was  
30  
31 216 based on the Keynote 189 trial, which excluded patients with sensitizing EGFR or ALK translocation,  
32  
33 217 because they usually used targeted agents as first-line treatment. However in the real-world setting, these  
34  
35 218 patients with unknown EGFR or ALK translocation were also likely to be received PD-L1 testing and  
36  
37 219 treated with pembrolizumab. Finally, our study directly compared pembrolizumab plus chemotherapy  
38  
39 220 with chemotherapy according to the KEYNOTE-189 trial. Although there are other potential first-line  
40  
41 221 treatments for advanced non-small cell lung cancer, our study did not indirectly compare them because of  
42  
43 222 the lack of convincing trial data and robust head-to-head trial data.

44  
45 223 Overall, the combination of pembrolizumab and chemotherapy for patients with metastatic NSCLC  
46  
47 224 that we studied has high incremental cost and modest incremental benefit. New treatment technology for  
48  
49 225 tumour is continuously undergoing development, but the price of tumour drugs is also rising dramatically.  
50  
51 226 Based on our analysis, pembrolizumab offers lower value at current cost. The provision of cost-effective  
52  
53 227 care requires new pricing and payment systems to support. The process for approving new drugs and the  
54  
55 228 process of incorporating them into the guidelines must balance costs and benefits, and our research can  
56  
57 229 offer decision-making information for this purpose.

58 230

1  
2  
3  
4  
5  
6  
7  
8  
9  
10  
11  
12  
13  
14  
15  
16  
17  
18  
19  
20  
21  
22  
23  
24  
25  
26  
27  
28  
29  
30  
31  
32  
33  
34  
35  
36  
37  
38  
39  
40  
41  
42  
43  
44  
45  
46  
47  
48  
49  
50  
51  
52  
53  
54  
55  
56  
57  
58  
59  
60

231

232

233 **Acknowledgements:** I certify that no individuals other than the listed co-authors contributed to this  
234 publication.

235 **Author Contributions:** Study concepts and design: Chongqing Tan; Clinical program: Fang Ma;  
236 Analysis and interpretation of the data: Liubao Peng, Ye Peng, Qiao Liu; The drafting and revising of the  
237 paper: Xiaohui Zeng and Xiaomin Wan; Final approved of manuscript: All authors; all authors agree to  
238 be accountable for all aspects of the work.

239 **Funding:** This work was supported by the National Natural Science Foundation of China [grant numbers  
240 81401547, 81603081]; and the Key Science-Technology Research and Development Program of Hunan  
241 Province [grant number 2016JC2062].

242 **Conflict of interest:** None declared.

243 **Ethics statement:** Ethical approval was not necessary, because our economic evaluation is based on a  
244 mathematical model analysis, and does not contain any studies with human participants or animals  
245 performed.

246 **Data sharing statement:** No additional data available.

247

248

249

250

251

252

253

254

255

256

257

258

259 **References**

- 260 1. WHO. International Agency for Research on Cancer. Estimated number of new cases in 2018,  
261 world, both sexes, all age. <http://globocan.iarc.fr>. Accessed 15 Dec 2018.
- 262 2. Nation Comprehensive Cancer Network. Non-small cell lung cancer. 2nd ed (2018).  
263 <https://www.nccn.org/>. Accessed 15 Dec 2018.
- 264 3. Peters S, Kerr KM, Stahel R. PD-1 blockade in advanced NSCLC: A focus on pembrolizumab.  
265 *Cancer Treat Rev* 2018;62:39-49. doi: 10.1016/j.ctrv.2017.10.002
- 266 4. Weiss GJ. A new era of treating advanced lung cancer is upon us. *Transl Lung Cancer Res*  
267 2018;7(Suppl 3):S202-S05. doi: 10.21037/tlcr.2018.07.03
- 268 5. Garon EB, Rizvi NA, Hui R, et al. Pembrolizumab for the treatment of non-small-cell lung cancer.  
269 *N Engl J Med* 2015;372(21):2018-28. doi: 10.1056/NEJMoa1501824
- 270 6. Scarpace SL. Metastatic squamous cell non-small-cell lung cancer (NSCLC): disrupting the drug  
271 treatment paradigm with immunotherapies. *Drugs Context* 2015;4:212289. doi: 10.7573/dic.212289
- 272 7. Armand P. Immune checkpoint blockade in hematologic malignancies. *Blood*  
273 2015;125(22):3393-400. doi: 10.1182/blood-2015-02-567453
- 274 8. Dang TO, Ogunniyi A, Barbee MS, et al. Pembrolizumab for the treatment of PD-L1 positive  
275 advanced or metastatic non-small cell lung cancer. *Expert Rev Anticancer Ther* 2016;16(1):13-20.  
276 doi: 10.1586/14737140.2016.1123626
- 277 9. Sul J, Blumenthal GM, Jiang X, et al. FDA Approval Summary: Pembrolizumab for the  
278 Treatment of Patients With Metastatic Non-Small Cell Lung Cancer Whose Tumors Express  
279 Programmed Death-Ligand 1. *Oncologist* 2016;21(5):643-50. doi: 10.1634/theoncologist.2015-0498
- 280 10. Gandhi L, Rodriguez-Abreu D, Gadgeel S, et al. Pembrolizumab plus Chemotherapy in  
281 Metastatic Non-Small-Cell Lung Cancer. *N Engl J Med* 2018;378(22):2078-92. doi:  
282 10.1056/NEJMoa1801005
- 283 11. Goldstein DA, Ahmad BB, Chen Q, et al. Cost-Effectiveness Analysis of Regorafenib for  
284 Metastatic Colorectal Cancer. *J Clin Oncol* 2015;33(32):3727-32. doi: 10.1200/JCO.2015.61.9569
- 285 12. Hoyle MW, Henley W. Improved curve fits to summary survival data: application to economic

- 1  
2  
3  
4  
5 286 evaluation of health technologies. *BMC Med Res Methodol* 2011;11:139. doi:  
6  
7 287 10.1186/1471-2288-11-139  
8  
9 288 13. Huang M, Lou Y, Pellissier J, et al. Cost-effectiveness of pembrolizumab versus docetaxel for  
10 289 the treatment of previously treated PD-L1 positive advanced NSCLC patients in the United States. *J*  
11  
12 290 *Med Econ* 2017;20(2):140-50. doi: 10.1080/13696998.2016.1230123  
13  
14 291 14. Huang M, Lou Y, Pellissier J, et al. Cost Effectiveness of Pembrolizumab vs. Standard-of-Care  
15  
16 292 Chemotherapy as First-Line Treatment for Metastatic NSCLC that Expresses High Levels of PD-L1  
17  
18 293 in the United States. *Pharmacoeconomics* 2017 doi: 10.1007/s40273-017-0527-z  
19  
20 294 15. Centers for Disease Control and Prevention. Faststats. <http://www.cdc.gov/nchs/fastats>.  
21  
22 295 Accessed 15 Dec 2018.  
23  
24 296 16. Center for Medicare and Medicaid Services. 2018-July-ASP-Pricing-File(2018).  
25  
26 297 <https://www.cms.gov/apps/ama/license.asp?File=/Medicare/Medicare-Fee-for-Service-Part-B-Drugs>  
27  
28 298 [/McrPartBDrugAvgSalesPrice/Downloads/2018-July-ASP-Pricing-File.zip](https://www.cms.gov/apps/ama/license.asp?File=/McrPartBDrugAvgSalesPrice/Downloads/2018-July-ASP-Pricing-File.zip). Accessed 15 Dec 2018.  
29  
30 299 17. Goldstein DA, Chen Q, Ayer T, et al. First- and second-line bevacizumab in addition to  
31  
32 300 chemotherapy for metastatic colorectal cancer: a United States-based cost-effectiveness analysis. *J*  
33  
34 301 *Clin Oncol* 2015;33(10):1112-8. doi: 10.1200/JCO.2014.58.4904  
35  
36 302 18. Oh A, Tran DM, McDowell LC, et al. Cost-Effectiveness of Nivolumab-Ipilimumab  
37  
38 303 Combination Therapy Compared with Monotherapy for First-Line Treatment of Metastatic  
39  
40 304 Melanoma in the United States. *J Manag Care Spec Pharm* 2017;23(6):653-64. doi:  
41  
42 305 10.18553/jmcp.2017.23.6.653  
43  
44 306 19. Chouaid C, Agulnik J, Goker E, et al. Health-related quality of life and utility in patients with  
45  
46 307 advanced non-small-cell lung cancer: a prospective cross-sectional patient survey in a real-world  
47  
48 308 setting. *J Thorac Oncol* 2013;8(8):997-1003. doi: 10.1097/JTO.0b013e318299243b [published  
49  
50 309 Online First: 2013/06/22]  
51  
52 310 20. Nafees B, Stafford M, Gavriel S, et al. Health state utilities for non small cell lung cancer.  
53  
54 311 *Health Qual Life Outcomes* 2008;6:84. doi: 10.1186/1477-7525-6-84 [published Online First:  
55  
56 312 2008/10/23]  
57  
58 313 21. Liao W, Huang J, Hutton D, et al. Cost-effectiveness analysis of first-line pembrolizumab  
59  
60



- 1  
2  
3  
4  
5 314 treatment for PD-L1 positive, non-small cell lung cancer in China. *J Med Econ* 2019;1. doi:  
6  
7 315 10.1080/13696998.2019.1570221  
8  
9 316 22. Chouaid C, Bensimon L, Clay E, et al. Cost-effectiveness analysis of pembrolizumab versus  
10  
11 317 standard-of-care chemotherapy for first-line treatment of PD-L1 positive (>50%) metastatic  
12  
13 318 squamous and non-squamous non-small cell lung cancer in France. *Lung Cancer* 2019;127:44-52.  
14  
15 319 doi: 10.1016/j.lungcan.2018.11.008  
16  
17 320 23. Hu X, Hay JW. First-line pembrolizumab in PD-L1 positive non-small-cell lung cancer: A  
18  
19 321 cost-effectiveness analysis from the UK health care perspective. *Lung Cancer* 2018;123:166-71. doi:  
20  
21 322 10.1016/j.lungcan.2018.07.012  
22  
23 323 24. Georgieva M, da Silveira Nogueira Lima JP, Aguiar P, Jr., et al. Cost-effectiveness of  
24  
25 324 pembrolizumab as first-line therapy for advanced non-small cell lung cancer. *Lung Cancer*  
26  
27 325 2018;124:248-54. doi: 10.1016/j.lungcan.2018.08.018  
28  
29 326 25. Reck M, Rodriguez-Abreu D, Robinson AG, et al. Pembrolizumab versus Chemotherapy for  
30  
31 327 PD-L1-Positive Non-Small-Cell Lung Cancer. *N Engl J Med* 2016;375(19):1823-33. doi:  
32  
33 328 10.1056/NEJMoa1606774  
34  
35 329 26. Kesselheim AS, Avorn J, Sarpatwari A. The High Cost of Prescription Drugs in the United  
36  
37 330 States: Origins and Prospects for Reform. *Jama* 2016;316(8):858-71. doi: 10.1001/jama.2016.11237  
38  
39 331 27. Goldstein DA, Gordon N, Davidescu M, et al. A Pharmacoeconomic Analysis of Personalized  
40  
41 332 Dosing vs Fixed Dosing of Pembrolizumab in Firstline PD-L1-Positive Non-Small Cell Lung  
42  
43 333 Cancer. *J Natl Cancer Inst* 2017;109(11) doi: 10.1093/jnci/djx063  
44  
45 334 28. Medicare Payment Advisory Commission. March 2018 Report To the Congress: Medicare  
46  
47 335 Payment Policy. <http://www.medpac.gov/-documents-/reports>. Accessed 15 Dec 2018.  
48  
49  
50  
51  
52  
53  
54  
55  
56  
57  
58  
59  
60

337 Table 1 Parameters for Cost Effectiveness Model

| Parameter                                           | Pembrolizumab |             | Placebo |             | Distribution |
|-----------------------------------------------------|---------------|-------------|---------|-------------|--------------|
|                                                     | Value         | Ranges      | Value   | Ranges      |              |
| Probabilities                                       |               |             |         |             |              |
| PFS (Weibull)                                       |               |             |         |             |              |
| Scale( $\lambda$ )                                  | 0.0448        |             | 0.0876  |             |              |
| Shape( $\gamma$ )                                   | 1.2675        |             | 1.2312  |             |              |
| OS(exponential)                                     |               |             |         |             |              |
| Scale( $\lambda$ )                                  | 0.0290        |             | 0.0586  |             |              |
| Costs (\$)                                          |               |             |         |             |              |
| Pembrolizumab/mg <sup>16</sup>                      | 48.57         | +/- 25%     | 48.57   | +/- 25%     | Lognorm      |
| Pemetrexed/mg <sup>16</sup>                         | 6.75          | +/- 25%     | 6.75    | +/- 25%     | Lognorm      |
| Cisplatin/mg <sup>16</sup>                          | 0.20          | +/- 25%     | 0.20    | +/- 25%     | Lognorm      |
| Carboplatin/mg <sup>16</sup>                        | 0.06          | +/- 25%     | 0.06    | +/- 25%     | Lognorm      |
| Chemotherapy infusion 1 hour <sup>16</sup>          | 145           | +/- 25%     | 145     | +/- 25%     | Lognorm      |
| Chemotherapy infusion additional hour <sup>16</sup> | 32            | +/- 25%     | 32      | +/- 25%     | Lognorm      |
| Subsequent therapies/cycle <sup>16</sup>            | 1160          | +/- 25%     | 4394    | +/- 25%     | Lognorm      |
| End-of-life care <sup>14</sup>                      | 33009         | +/- 25%     | 33009   | +/- 25%     | Lognorm      |
| AE hospitalization cost <sup>13</sup>               | 3538          | +/- 50%     | 3005    | +/-50%      | Lognorm      |
| Baseline utilities                                  |               |             |         |             |              |
| PFS <sup>19</sup>                                   | 0.71          | 0.67–0.76   | 0.71    | 0.67–0.76   | Beta         |
| disease progression survival <sup>19</sup>          | 0.67          | 0.59–0.75   | 0.67    | 0.59–0.75   | Beta         |
| Disutilities                                        |               |             |         |             |              |
| Neutropenia <sup>20</sup>                           | 0.09          | 0.060-0.119 | 0.09    | 0.060-0.119 | Beta         |
| Pneumonia <sup>20</sup>                             | 0.09          | 0.059-0.121 | 0.09    | 0.059-0.121 | Beta         |

338 PFS: progression-free survival; OS: overall survival; AE: adverse effect.

339

340 Table 2 Pembrolizuman plus Chemotherapy Cost-Effectiveness at Additional Modeled Price Points

| Parameter             | Base-Case Model Analysis* |        |
|-----------------------|---------------------------|--------|
| WTP value, \$/QALY    | 100000                    | 15000  |
| Nivolumab cost, \$/mg | 12.05                     | 31.38  |
| Total cost, \$        | 176197                    | 235651 |
| QALYs                 | 1.61                      | 1.61   |
| ICER, \$/QALY         | 99915                     | 149907 |

341 ICER: incremental cost-effectiveness ratio; QALY: quality-adjusted life-year; WTP: Willingness-to-pay.

342 \* Only the cost of pembrolizumab was varied.

343

344

345

346

347

348

349

350

351

352

353

354

355

356

357

358

359

360

361

1  
2  
3  
4  
5 362 **Fig.1** State transition diagram. The three circles show three main health states. Patients can transition  
6  
7 363 from “progression-free survival” to “disease progression survival” or “death”

8  
9 364  
10  
11 365 **Fig.2** Tornado diagrams. The graphic shows the impact of varying individual model inputs on the  
12  
13 366 cost-effectiveness of pembrolizumab plus chemotherapy for metastatic NSCLC. ICER: incremental  
14  
15 367 cost-effectiveness ratio. NSCLC: non-small cell lung cancer

16  
17 368  
18  
19 369 **Fig.3** Cost-effectiveness acceptability curve. This plot represents the results of a probabilistic sensitivity  
20  
21 370 analysis (for details, see Methods) comparing the cost-effectiveness of  
22  
23 371 pembrolizumab-pemetrexed-platinum versus placebo-pemetrexed-platinum in metastatic NSCLC. CE:  
24  
25 372 cost-effectiveness. NSCLC: non-small cell lung cancer

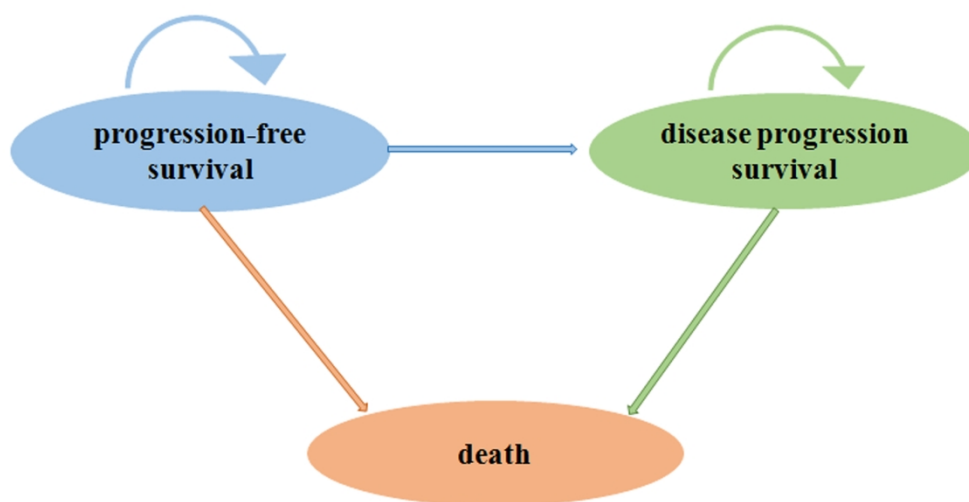

Fig.1 State transition diagram. The three circles show three main health states. Patients can transition from "progression-free survival" to "disease progression survival" or "death"

82x45mm (600 x 600 DPI)

1  
2  
3  
4  
5  
6  
7  
8  
9  
10  
11  
12  
13  
14  
15  
16  
17  
18  
19  
20  
21  
22  
23  
24  
25  
26  
27  
28  
29  
30  
31  
32  
33  
34  
35  
36  
37  
38  
39  
40  
41  
42  
43  
44  
45  
46  
47  
48  
49  
50  
51  
52  
53  
54  
55  
56  
57  
58  
59  
60

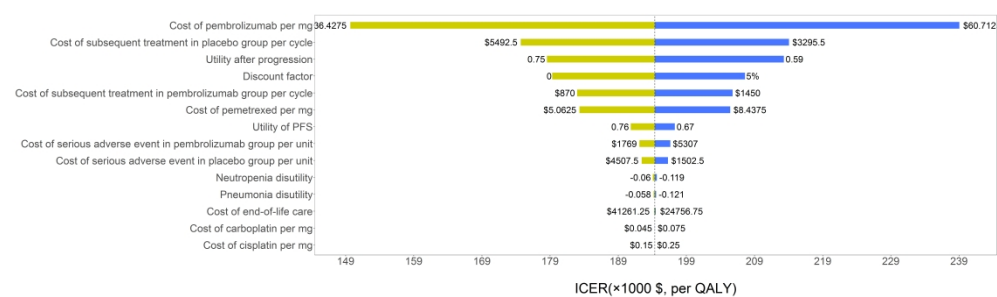

Fig.2 Tornado diagrams. The graphic shows the impact of varying individual model inputs on the cost-effectiveness of pembrolizumab plus chemotherapy for metastatic NSCLC. ICER: incremental cost-effectiveness ratio. NSCLC: non-small cell lung cancer

889x254mm (300 x 300 DPI)



Fig.3 Cost-effectiveness acceptability curve. This plot represents the results of a probabilistic sensitivity analysis (for details, see Methods) comparing the cost-effectiveness of pembrolizumab-pemetrexed-platinum versus placebo-pemetrexed-platinum in metastatic NSCLC. CE: cost-effectiveness. NSCLC: non-small cell lung cancer

169x104mm (600 x 600 DPI)

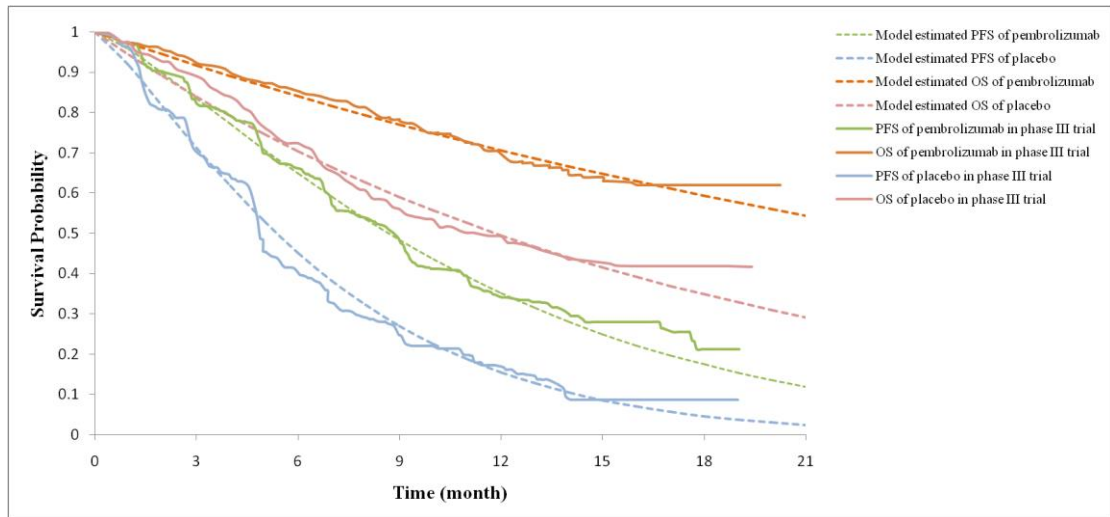

**Supplementary appendix 1.** Survival curves. PFS and OS were fitted with Weibull and exponential model, respectively, according to the original curves shown in clinical trials. PFS: progression-free survival; OS: overall survival.



## Supplementary appendix 2 Results for subgroup analyses

| Subgroup                     | OS HR (95% CI)   | PFS HR (95% CI)  | ICER   | Cost-effectiveness probability at the threshold of \$100000/QALY | Cost-effectiveness probability at the threshold of \$150000/QALY |
|------------------------------|------------------|------------------|--------|------------------------------------------------------------------|------------------------------------------------------------------|
| Sex                          |                  |                  |        |                                                                  |                                                                  |
| Male                         | 0.70 (0.50–0.99) | 0.66 (0.50–0.87) | 172432 | 0                                                                | 15%                                                              |
| Female                       | 0.29 (0.19–0.44) | 0.40 (0.29–0.54) | 115344 | 3%                                                               | 100%                                                             |
| Smoking status               |                  |                  |        |                                                                  |                                                                  |
| Current or former            | 0.54 (0.41–0.71) | 0.54 (0.43–0.66) | 151882 | 0                                                                | 40%                                                              |
| Never                        | 0.23 (0.10–0.54) | 0.43 (0.23–0.81) | 99695  | 36%                                                              | 100%                                                             |
| PD-L1 tumor proportion score |                  |                  |        |                                                                  |                                                                  |
| <1%                          | 0.59 (0.38–0.92) | 0.75 (0.53–1.05) | 132478 | 1%                                                               | 86%                                                              |
| 1-49%                        | 0.55 (0.34–0.90) | 0.55 (0.37–0.81) | 152694 | 0                                                                | 38%                                                              |
| ≥50%                         | 0.42 (0.26–0.68) | 0.36 (0.25–0.52) | 154361 | 0                                                                | 30%                                                              |

PFS: progression-free survival; OS: overall survival; HR: hazard ratio; ICER: incremental cost-effectiveness ratio; QALY: quality-adjusted life year.

## Consolidated Health Economic Evaluation Reporting Standards – CHEERS Checklist 1

**CHEERS Checklist****Items to include when reporting economic evaluations of health interventions**

The **ISPOR CHEERS Task Force Report**, *Consolidated Health Economic Evaluation Reporting Standards (CHEERS)—Explanation and Elaboration: A Report of the ISPOR Health Economic Evaluations Publication Guidelines Good Reporting Practices Task Force*, provides examples and further discussion of the 24-item CHEERS Checklist and the CHEERS Statement. It may be accessed via the *Value in Health* or via the ISPOR Health Economic Evaluation Publication Guidelines – CHEERS: Good Reporting Practices webpage: <http://www.ispor.org/TaskForces/EconomicPubGuidelines.asp>

| Section                         | Item No | Recommendation                                                                                                                                                                          | Reported on page No/line No |
|---------------------------------|---------|-----------------------------------------------------------------------------------------------------------------------------------------------------------------------------------------|-----------------------------|
| <b>Title and Abstract</b>       |         |                                                                                                                                                                                         |                             |
| Title                           | 1       | Identify the study as an economic evaluation or use more specific terms such as “cost-effectiveness analysis”, and describe the interventions compared.                                 | P1/L1-2                     |
| Abstract                        | 2       | Provide a structured summary of objectives, perspective, setting, methods (including study design and inputs), results (including base case and uncertainty analyses), and conclusions. | P2/L33-45                   |
| <b>Introduction</b>             |         |                                                                                                                                                                                         |                             |
| Background and objectives       | 3       | Provide an explicit statement of the broader context for the study.<br>Present the study question and its relevance for health policy or practice decisions.                            | P2-3/L58-76                 |
| <b>Methods</b>                  |         |                                                                                                                                                                                         |                             |
| Target population and subgroups | 4       | Describe characteristics of the base case population and subgroups analysed, including why they were chosen.                                                                            | P3/L79-80                   |
| Setting and location            | 5       | State relevant aspects of the system(s) in which the decision(s) need(s) to be made.                                                                                                    | P3/L81-85                   |
| Study perspective               | 6       | Describe the perspective of the study and relate this to the costs being evaluated.                                                                                                     | P3/L76                      |
| Comparators                     | 7       | Describe the interventions or strategies being compared and state why they were chosen.                                                                                                 | P3/L82                      |
| Time horizon                    | 8       | State the time horizon(s) over which costs and consequences are being evaluated and say why appropriate.                                                                                | P3/L88-89                   |
| Discount rate                   | 9       | Report the choice of discount rate(s) used for costs and outcomes and say why appropriate.                                                                                              | P3/L88                      |
| Choice of health outcomes       | 10      | Describe what outcomes were used as the measure(s) of benefit in the evaluation and their relevance for the type of analysis performed.                                                 | P3/L90-91                   |
| Measurement of effectiveness    | 11a     | <i>Single study-based estimates</i> : Describe fully the design features of the single effectiveness study and why the single                                                           |                             |

## Consolidated Health Economic Evaluation Reporting Standards – CHEERS Checklist 2

|                                                        |     |                                                                                                                                                                                                                                                                                                                                                       |               |
|--------------------------------------------------------|-----|-------------------------------------------------------------------------------------------------------------------------------------------------------------------------------------------------------------------------------------------------------------------------------------------------------------------------------------------------------|---------------|
|                                                        |     | study was a sufficient source of clinical effectiveness data.                                                                                                                                                                                                                                                                                         |               |
|                                                        | 11b | <i>Synthesis-based estimates</i> : Describe fully the methods used for identification of included studies and synthesis of clinical effectiveness data.                                                                                                                                                                                               | P5/L126-130   |
| Measurement and valuation of preference based outcomes | 12  | If applicable, describe the population and methods used to elicit preferences for outcomes.                                                                                                                                                                                                                                                           |               |
| Estimating resources and costs                         | 13a | <i>Single study-based economic evaluation</i> : Describe approaches used to estimate resource use associated with the alternative interventions. Describe primary or secondary research methods for valuing each resource item in terms of its unit cost. Describe any adjustments made to approximate to opportunity costs.                          |               |
|                                                        | 13b | <i>Model-based economic evaluation</i> : Describe approaches and data sources used to estimate resource use associated with model health states. Describe primary or secondary research methods for valuing each resource item in terms of its unit cost. Describe any adjustments made to approximate to opportunity costs.                          | P4-5/L104-125 |
| Currency, price date, and conversion                   | 14  | Report the dates of the estimated resource quantities and unit costs. Describe methods for adjusting estimated unit costs to the year of reported costs if necessary. Describe methods for converting costs into a common currency base and the exchange rate.                                                                                        | P3/L86-87     |
| Choice of model                                        | 15  | Describe and give reasons for the specific type of decision-analytical model used. Providing a figure to show model structure is strongly recommended.                                                                                                                                                                                                | P3/L79        |
| Assumptions                                            | 16  | Describe all structural or other assumptions underpinning the decision-analytical model.                                                                                                                                                                                                                                                              | P3/L80-85     |
| Analytical methods                                     | 17  | Describe all analytical methods supporting the evaluation. This could include methods for dealing with skewed, missing, or censored data; extrapolation methods; methods for pooling data; approaches to validate or make adjustments (such as half cycle corrections) to a model; and methods for handling population heterogeneity and uncertainty. | P5/L131-137   |
| <b>Results</b>                                         |     |                                                                                                                                                                                                                                                                                                                                                       |               |
| Study parameters                                       | 18  | Report the values, ranges, references, and, if used, probability distributions for all parameters. Report reasons or sources for distributions used to represent uncertainty where appropriate. Providing a table to show the input values is strongly recommended.                                                                                   | P12/L321      |
| Incremental costs and outcomes                         | 19  | For each intervention, report mean values for the main categories of estimated costs and outcomes of interest, as well as mean differences between the comparator groups. If                                                                                                                                                                          | P5/L139-144   |

## Consolidated Health Economic Evaluation Reporting Standards – CHEERS Checklist 3

|                                                                      |     |                                                                                                                                                                                                                                                                              |                |
|----------------------------------------------------------------------|-----|------------------------------------------------------------------------------------------------------------------------------------------------------------------------------------------------------------------------------------------------------------------------------|----------------|
|                                                                      |     | applicable, report incremental cost-effectiveness ratios.                                                                                                                                                                                                                    |                |
| Characterizing uncertainty                                           | 20a | <i>Single study-based economic evaluation</i> : Describe the effects of sampling uncertainty for the estimated incremental cost and incremental effectiveness parameters, together with the impact of methodological assumptions (such as discount rate, study perspective). |                |
|                                                                      | 20b | <i>Model-based economic evaluation</i> : Describe the effects on the results of uncertainty for all input parameters, and uncertainty related to the structure of the model and assumptions.                                                                                 | P6/L145-157    |
| Characterizing heterogeneity                                         | 21  | If applicable, report differences in costs, outcomes, or cost-effectiveness that can be explained by variations between subgroups of patients with different baseline characteristics or other observed variability in effects that are not reducible by more information.   |                |
| <b>Discussion</b>                                                    |     |                                                                                                                                                                                                                                                                              |                |
| Study findings, limitations, generalizability, and current knowledge | 22  | Summarise key study findings and describe how they support the conclusions reached. Discuss limitations and the generalisability of the findings and how the findings fit with current knowledge.                                                                            | P6-P8/L158-202 |
| <b>Other</b>                                                         |     |                                                                                                                                                                                                                                                                              |                |
| Source of funding                                                    | 23  | Describe how the study was funded and the role of the funder in the identification, design, conduct, and reporting of the analysis. Describe other non-monetary sources of support.                                                                                          | P8/L210-212    |
| Conflicts of interest                                                | 24  | Describe any potential for conflict of interest of study contributors in accordance with journal policy. In the absence of a journal policy, we recommend authors comply with International Committee of Medical Journal Editors recommendations.                            | P8/L213        |

For consistency, the CHEERS Statement checklist format is based on the format of the CONSORT statement checklist

The **ISPOR CHEERS Task Force Report** provides examples and further discussion of the 24-item CHEERS Checklist and the CHEERS Statement. It may be accessed via the *Value in Health* link or via the ISPOR Health Economic Evaluation Publication Guidelines – CHEERS: Good Reporting Practices webpage: <http://www.ispor.org/TaskForces/EconomicPubGuidelines.asp>

The citation for the CHEERS Task Force Report is:  
 Husereau D, Drummond M, Petrou S, et al. Consolidated health economic evaluation reporting standards (CHEERS)—Explanation and elaboration: A report of the ISPOR health economic evaluations publication guidelines good reporting practices task force. *Value Health* 2013;16:231-50.

# BMJ Open

## Cost-effectiveness analysis of pembrolizumab plus chemotherapy for previously untreated metastatic non-small-cell lung cancer in the United States

|                                 |                                                                                                                                                                                                                                                                                       |
|---------------------------------|---------------------------------------------------------------------------------------------------------------------------------------------------------------------------------------------------------------------------------------------------------------------------------------|
| Journal:                        | <i>BMJ Open</i>                                                                                                                                                                                                                                                                       |
| Manuscript ID                   | bmjopen-2019-031019.R3                                                                                                                                                                                                                                                                |
| Article Type:                   | Original research                                                                                                                                                                                                                                                                     |
| Date Submitted by the Author:   | 22-Nov-2019                                                                                                                                                                                                                                                                           |
| Complete List of Authors:       | Zeng, Xiaohui ; Second Xiangya Hospital<br>Wan, Xiaomin; Second Xiangya Hospital<br>Peng, Liubao; Second Xiangya Hospital<br>Peng, Ye; Second Xiangya Hospital<br>Ma, Fang; Second Xiangya Hospital<br>Liu, Qiao; Second Xiangya Hospital<br>Tan, Chongqing; Second Xiangya Hospital, |
| <b>Primary Subject Heading</b>: | Health economics                                                                                                                                                                                                                                                                      |
| Secondary Subject Heading:      | Oncology                                                                                                                                                                                                                                                                              |
| Keywords:                       | Immunology < BASIC SCIENCES, CHEMOTHERAPY, HEALTH ECONOMICS                                                                                                                                                                                                                           |
|                                 |                                                                                                                                                                                                                                                                                       |

SCHOLARONE™  
Manuscripts

1  
2  
3  
4 **1 Cost-effectiveness analysis of pembrolizumab plus chemotherapy for previously**  
5 **2 untreated metastatic non-small-cell lung cancer in the United States**

6  
7  
8  
9 3 *Xiaohui Zeng<sup>c,§</sup>, Xiaomin Wan<sup>a,§</sup>, Liubao Peng<sup>a</sup>, Ye Peng<sup>a</sup>, Fang Ma<sup>b</sup>, Qiao Liu<sup>a</sup>, Chongqing Tan<sup>a,\*</sup>*

10  
11  
12 4 <sup>§</sup>Xiaohui Zeng and Xiaomin Wan contributed equally to this work.

13  
14  
15 5 <sup>a</sup> Department of Pharmacy, The Second Xiangya Hospital, Central South University, Changsha, Hunan  
16 410011, China

17  
18  
19 6 <sup>b</sup> Department of Oncology, The Second Xiangya Hospital, Central South University, Changsha, Hunan  
20 410011, China

21  
22  
23 7 <sup>c</sup> PET-CT Center, The Second Xiangya Hospital, Central South University, Changsha, Hunan 410011,  
24 China

25  
26  
27  
28 8 **\*Author for correspondence:** Chongqing Tan. Department of Pharmacy, The Second Xiangya Hospital,  
29 Central South University, Changsha, Hunan 410011, China. Tel: +86073185292094. Email:  
30 [tanchongqing@csu.edu.cn](mailto:tanchongqing@csu.edu.cn).  
31  
32  
33

34  
35 9 **Word count:** 1821.  
36  
37  
38  
39  
40  
41  
42  
43  
44  
45  
46  
47  
48  
49  
50  
51  
52  
53  
54  
55  
56  
57  
58  
59  
60

1  
2  
3  
4 33 **Abstract**  
5

6 34 **Objectives:** Evaluating the cost-effectiveness of pembrolizumab plus standard chemotherapy in the  
7 first-line setting for patients with metastatic non-small cell lung cancer (NSCLC) from the US-payer  
8 perspective.  
9 36

10 37 **Design:** A Markov model was constructed to analyse the cost-effectiveness of pembrolizumab plus  
11 chemotherapy in the first-line treatment of metastatic NSCLC. Health outcomes were estimated in  
12 quality-adjusted life-years (QALYs). The cost information was from Medicare in 2018. One-way and  
13 probabilistic sensitivity analyses examined the impact of uncertainty and assumptions on the results.  
14 40

15 41 **Setting:** The US-payer perspective.

16 42 **Participants:** A hypothetical US cohort of patients with previously untreated metastatic nonsquamous  
17 NSCLC without EGFR or ALK mutations.  
18 43

19 44 **Interventions:** Pembrolizumab plus chemotherapy versus chemotherapy.

20 45 **Primary outcome measures:** Costs, QALYs, incremental cost-effectiveness ratio (ICER) of  
21 pembrolizumab plus chemotherapy expressed as cost per QALY gained compared with chemotherapy  
22 46

23 47 **Results:** The base-case analysis demonstrated that pembrolizumab plus chemotherapy provided an  
24 additional 0.78 QALYs at incremental cost of \$151,409, resulting in an ICER of \$194,372/QALY. The  
25 ICER for pembrolizumab plus chemotherapy was > \$149,680/QALY in all of our univariable and  
26 probabilistic sensitivity analyses.  
27 50

28 51 **Conclusions:** Pembrolizumab in addition to chemotherapy provides modest incremental benefit at high  
29 incremental cost per QALY for the treatment of previously untreated metastatic NSCLC.  
30 52  
31 53

32  
33 54 **Article Summary**  
34

- 35 55 1. The study strengths of this model-based economic assessment include that it is based on rigorous  
36 randomized controlled trials.  
37 56  
38 57 2. From a US payer perspective, the cost and outcome data included in the model are collected for  
39 analysis.  
40 58  
41 59 3. The limitation of this study is that because of the limited time scale of the model and the lack of  
42 long-term data, not all potential outcomes are included.  
43 60  
44 61  
45 62  
46 63  
47 64  
48 65  
49 66  
50  
51  
52  
53  
54  
55  
56  
57  
58  
59  
60

## 67 **1 Introduction**

68 Globally, lung cancer had an incidence rate of 27.4 per 100,000 and a mortality rate of 23.1 per  
69 100,000 in 2018 <sup>1</sup>, and non-small cell lung cancer (NSCLC) accounted for the vast majority of these cases  
70 <sup>2</sup>. Multiple drug regimens are available for the treatment of advanced NSCLC, including platinum based  
71 combination chemotherapy, anaplastic lymphoma kinase (ALK) tyrosine kinase inhibitor (TKI),  
72 epidermal growth factor receptor (EGFR)TKI and immune checkpoint inhibitors<sup>2</sup>. Immune checkpoint  
73 inhibitors showed higher efficacy and less toxicity compared to other therapies <sup>3</sup>.

74 A new era of treating advanced NSCLC is upon us after the emergence of immunosuppressive  
75 agents <sup>4</sup>. Immune checkpoint inhibitors improve antitumor immunity by inhibiting programmed death  
76 1(PD-1) receptor or programmed cell death ligand 1 (PD-L1) <sup>2 5-7</sup>. Pembrolizumab, a PD-1 inhibitor, was  
77 approved by the US Food and Drug Administration (FDA) for treatment of advanced NSCLC in 2015 <sup>8</sup>  
78 <sup>9</sup>.The Keynote-189 clinical trial showed pembrolizumab in combination with pemetrexed plus carboplatin  
79 or cisplatin could extended progression-free survival (PFS) by 3.9 months for patients with metastatic  
80 NSCLC without sensitizing ALK or EGFR mutations <sup>10</sup>.

81 Although pembrolizumab plus chemotherapy improved survival significantly, the additional cost  
82 was notably high. Therefore, it is worth discussing whether pembrolizumab plus chemotherapy is a  
83 cost-effective regimen. The goal of this study was to analyse the cost-effectiveness of pembrolizumab  
84 plus chemotherapy for previously untreated metastatic NSCLC without ALK or EGFR mutations from  
85 the US-payer perspective.

## 86 **2 Material and methods**

### 87 **2.1 Decision model**

88 A Markov model was built to simulate the flow process of patient morbidity, treatment, and  
89 survival for previously untreated metastatic NSCLC, using three states, namely PFS state, disease  
90 progression survival state, and death (Fig.1).All patients entranced the model in the PFS state, with  
91 the treatment of pemetrexed combined platinum plus pembrolizumab or placebo. Patients who  
92 experienced progression could receive carboplatin plus pemetrexed, docetaxel plus ramucirumab,  
93 docetaxel monotherapy, nivolumab or pembrolizumab, because these regimens were used most in



1  
2  
3  
4  
5 94 the Keynote-189 trial <sup>10</sup>. All patients were assumed to receive end-of-life care before death.

6  
7 95 Each health state was assigned a health utility from published studies. Only direct costs were  
8  
9 96 considered and adapted for 2018 US dollars using the Medical Care Consumer Price Index. All costs and  
10  
11 97 health outcomes were discounted at an annual discount rate of 3% <sup>11</sup>. The model simulated a 20-year  
12  
13 98 period and each model cycle represented 21 days because in the clinical trial patients received  
14  
15 99 pembrolizumab plus chemotherapy every 3 weeks <sup>10</sup>. The primary outputs of the Markov model included  
16  
17 100 cost and quality-adjusted life years (QALYs), which were applied to estimate the incremental  
18  
19 101 cost-effectiveness ratio (ICER). All analyses were performed in TreeAge pro 2018 software  
20  
21 102 (<https://www.treeage.com>).

## 23 103 **2.2 Model probabilities**

24  
25 104 The probability of transition of disease progression and from any state to death were from the  
26  
27 105 survival curve of pembrolizumab or placebo combined with chemotherapy in the keynote-189 trial <sup>10</sup>. We  
28  
29 106 used the GetData Graph Digitizer software (version 2.25) to extract the data points of the Kaplan-Meier  
30  
31 107 curves. According to the Akaike information criterion (AIC) and Bayesian information criterion (BIC),  
32  
33 108 the PFS data points were fitted by a Weibull distribution, and overall survival (OS) data points were fitted  
34  
35 109 with an exponential distribution <sup>12</sup>. The distribution parameters were calculated using the method of  
36  
37 110 Hoyle et al <sup>12</sup>. Finally, the PFS and OS rates of each cycle were estimated by  $\exp(-\lambda t^\gamma)$  and  $\exp(-\lambda t)$ ,  
38  
39 111 respectively, where  $\lambda$  is the scale parameter,  $\gamma$  is the shape parameter, and  $t$  is survival time (Table 1 near  
40  
41 112 here).

## 43 113 **2.3 Costs**

44  
45  
46 114 Only direct costs, including the costs of the drug, premedication, administration and management of  
47  
48 115 serious adverse events (AEs) (Table 1 near here), were considered in our evaluation. In the PFS state, the  
49  
50 116 cost of the intravenous drug for 3-week cycle was based on the following doses: pembrolizumab  
51  
52 117 200mg/cycle, pemetrexed 500mg/m<sup>2</sup>, cisplatin 75 mg/m<sup>2</sup> and carboplatin 400 mg/m<sup>2</sup>.

53  
54 118 The model considered the hospitalization cost of patients with AE  $\geq$  grade 3, and the incidence  
55  
56 119 rate exceeded 5% because these AEs were of great concern to clinicians<sup>13</sup>. And then the incidence rates of  
57  
58 120 neutropenia and pneumonia from the Keynote-189 trial, were used to calculate the cost of AEs treatments  
59  
60

1  
2  
3  
4  
5 121 <sup>10</sup>.

6 122 Based on the Keynote-189 trial <sup>10</sup>, 30.5% of the patients in the pembrolizumab plus chemotherapy  
7 123 group and 46.6% in the placebo plus chemotherapy group received subsequent therapy after disease  
8 124 progression. Among patients in the pembrolizumab plus chemotherapy group, 3% received carboplatin  
9 125 plus pemetrexed, 2.3% received docetaxel plus ramucirumab, 17.8% received docetaxel, 4% received  
10 126 nivolumab and 3.4% received continuation maintenance treatment of pembrolizumab; among patients in  
11 127 the placebo plus chemotherapy group, 1.7% received docetaxel, 7.8% received nivolumab and 38%  
12 128 received crossover treatment with pembrolizumab. Patients who died accrued the cost of terminal care,  
13 129 including hospitalization, palliative chemotherapy, doctor consultation, laboratory, and diagnostic tests,  
14 130 according to the published literature <sup>14</sup>.

15 131 The mean value of a body-surface area and body weight are 1.84m<sup>2</sup> and 82kg, respectively <sup>13 15</sup>. The  
16 132 drug costs were taken from the Centers for Medicare and Medicaid Services<sup>16</sup>. Administration costs were  
17 133 calculated according to the Medicare physician fee schedule for 2018<sup>17</sup>. The costs of AEs and end-of-life  
18 134 care were derived from the published literature <sup>13</sup>.

#### 19 135 **2.4 Outcome measures**

20 136 The outcome indicator of the study was QALYs, which is defined by the patient's life years and  
21 137 health utility. In accordance with the approach of Anna Oh et al <sup>18</sup>, we also considered the disutility of AE.  
22 138 Baseline utility and disutility values were referenced in the published literature (Table 1 near here) <sup>19 20</sup>.

#### 23 139 **2.5 Analysis**

24 140 The uncertainty of the parameters was evaluated by one-way sensitivity analysis and probabilistic  
25 141 sensitivity analysis, through the use of tornado diagrams and Monte Carlo simulation respectively. The  
26 142 beta distribution was applied for the utilities, and the lognormal distribution was applied for the cost.  
27 143 Utilities were varied over their 95% CIs. In general, the upper and lower limits of the parameters were  
28 144 taken from the literature, and if otherwise, upper and lower limits of 25% were set. All baseline values  
29 145 and ranges for variables are shown in Table 1.

#### 30 146 **2.6 Patient and public involvement**

1  
2  
3  
4  
5 147 No patients or public were involved in the study.  
6

### 7 148 **3 Results**

#### 9 149 **3.1 Base case analysis**

10  
11  
12  
13 150 Weibull and exponential models used to fit the survival curves from the clinical trial (supplementary  
14  
15 151 appendix 1), which show that the decision analysis model established in this study can reflect the clinical  
16  
17 152 effects very well. In the base case analysis, the lifetime cost of using pembrolizumab plus chemotherapy  
18  
19 153 was \$288,532 compared with \$137,123 for placebo plus chemotherapy. When considering effectiveness,  
20  
21 154 the pembrolizumab plus chemotherapy strategy yielded 1.61 QALYs, compared with 0.83 QALYs for the  
22  
23 155 placebo plus chemotherapy strategy. The ICER of pembrolizumab plus chemotherapy was calculated as  
24  
25 156 \$194,372/QALY compared with the placebo plus chemotherapy. When pembrolizumab cost \$12.05 and  
26  
27 157 \$31.38/mg, the ICERs approximated the WTP thresholds of \$100,000 and \$150,000/QALY, respectively  
28  
29 158 (Table2).

#### 30 31 159 **3.2 Sensitivity analysis**

32  
33  
34 160 The tornado diagrams present the results of one-way sensitivity analyses. Obviously, the cost of  
35  
36 161 pembrolizumab, the cost of subsequent treatment in the placebo-combination group and baseline utility  
37  
38 162 values of OS were the most relatively sensitive parameters, and the ICER range was from  
39  
40 163 \$149,680/QALY to \$239,065/QALY (Fig.2). The discount rate, the cost of subsequent treatment in the  
41  
42 164 pembrolizumab-combination group, the cost of pemetrexed, the baseline utility value of PFS and the cost  
43  
44 165 of AE management had little impact on the model.

45  
46 166 The cost-effectiveness acceptability curve shows the probabilistic sensitivity analysis results of  
47  
48 167 different willingness-to-pay (WTP) thresholds (Fig.3). The probability that pembrolizumab combined  
49  
50 168 with chemotherapy is cost-effective increased as WTP increased. The results showed that the probability  
51  
52 169 of pembrolizumab plus chemotherapy being cost-effective was 0% at a WTP threshold of  
53  
54 170 \$130,000/QALY. If WTP threshold is \$192,000/QALY, the pembrolizumab plus chemotherapy strategy  
55  
56 171 show a 50% chance cost-effectiveness (Fig.3).

57 172 The results of the subgroup analysis showed that pembrolizumab combined with chemotherapy was  
58  
59 173 the most cost-effective (36%) for patients who had never smoked at a WTP threshold of \$100,000. When  
60

1  
2  
3  
4 174 the WTP threshold was \$150,000, the probability of pembrolizumab combined with chemotherapy being  
5 175 cost-effective in the subgroup of never-smoking and female patients was 100% (Supplementary Appendix  
6 176 2).

#### 9 177 **4 Discussion**

10  
11  
12 178 We performed a cost-effectiveness analysis of pembrolizumab in addition to chemotherapy in  
13  
14 179 previously untreated metastatic NSCLC. Based on our model, the ICER for pembrolizumab plus  
15  
16 180 chemotherapy was estimated as \$194,372/QALY compared with the placebo plus chemotherapy. The  
17  
18 181 results showed that the probability of pembrolizumab plus chemotherapy being cost-effective was 0% at a  
19  
20 182 WTP threshold of \$130,000/QALY.

21  
22 183 There are many other studies that have analyzed the cost-effectiveness of pembrolizumab for  
23  
24 184 advanced NSCLC in different setting<sup>13 14 21-24</sup>. In the KEYNOTE-024 trial, pembrolizumab demonstrated  
25  
26 185 the incremental survival benefits and better safety profile versus chemotherapy for first-line treatment of  
27  
28 186 PD-L1 -positive ( $\geq 50\%$ ) metastatic NSCLC patients<sup>25</sup>. Based on the KEYNOTE-024 trial, a US-based  
29  
30 187 study found that pembrolizumab was cost effective, with an ICER of \$97,621/QALY<sup>14</sup>, a study by  
31  
32 188 Georgieva et al. demonstrated that pembrolizumab monotherapy was cost-effective in the US but not the  
33  
34 189 UK<sup>24</sup>, a study by Hu X et al. conducted in the UK demonstrated that pembrolizumab plus chemotherapy  
35  
36 190 was not cost-effective, with an ICER of £86,913/QALY<sup>23</sup>, and a French study found that pembrolizumab  
37  
38 191 appears cost-effective<sup>22</sup>. Our results differ from the above results may be due to different health systems  
39  
40 192 and costs in different countries, which leads to different cost-effectiveness conclusions. Based on the  
41  
42 193 KEYNOTE-010 trial, a study analysed the cost-effectiveness of pembrolizumab and docetaxel as  
43  
44 194 second-line treatment for PD-L1 positive advanced NSCLC from the US third-party payer perspective.  
45  
46 195 The results showed that the ICER was \$168,619/QALY, which was cost-effective at a threshold of three  
47  
48 196 times GDP per capita (\$171,660)<sup>13</sup>. These data provide reference value for evaluating the total cost of  
49  
50 197 therapy and the value of regimens for advanced NSCLC.

51 198 Our one-way sensitivity analysis revealed that the cost of pembrolizumab had a great influence on  
52  
53 199 the results of the study. High drug prices are the result of the monopoly of pharmaceutical companies and  
54  
55 200 restrictions on the negotiating power of the payer<sup>26</sup>. This can be addressed by providing more meaningful  
56  
57 201 price negotiation opportunities for payers and providing more evidence of a cost-effectiveness  
58  
59 202 comparison of treatment regimens<sup>26</sup>. We can also reduce the cost of administration by using personalized  
60

1  
2  
3  
4  
5 203 dosing. Recent study has shown that personalized dosing (2mg/kg) and fixed dosing (200mg) of  
6  
7 204 pembrolizumab have equivalent efficacy <sup>27</sup>. Avoiding drug waste is extremely important in an era of  
8  
9 205 value-based cancer therapy <sup>27</sup>. When our study used 2 mg/kg of pembrolizumab based on the average  
10  
11 206 weight of 82 kg <sup>15</sup>, the ICER was reduced to \$171,751. We believe that manufacturers are responsible for  
12  
13 207 providing multiple sizes of vials to minimize the chance of wastage.

14  
15 208 However, there are few limitations to our study that deserve consideration. First, we used cost  
16  
17 209 parameters provided by Medicare, which may be lower than private insurers <sup>28</sup>. Second, the health utility  
18  
19 210 values were taken from other data sources instead of patients who participated in the Keynote 189 trial,  
20  
21 211 which limits the accuracy of our results. Unfortunately, the clinical trial did not report the quality of life.  
22  
23 212 Third, our analysis did not estimate the costs for all AEs in the PFS state, which may lead to  
24  
25 213 underestimation of AEs costs. However, considering the low incidence, we expect the inclusion of all  
26  
27 214 AEs would not change the conclusions of the present analysis. In addition, our model applied sensitivity  
28  
29 215 analysis to a wide variation of these parameters, and it does not affect the results. Fourth, our analysis was  
30  
31 216 based on the Keynote 189 trial, which excluded patients with sensitizing EGFR or ALK translocation,  
32  
33 217 because they usually used targeted agents as first-line treatment. However in the real-world setting, these  
34  
35 218 patients with unknown EGFR or ALK translocation were also likely to be received PD-L1 testing and  
36  
37 219 treated with pembrolizumab. Finally, our study directly compared pembrolizumab plus chemotherapy  
38  
39 220 with chemotherapy according to the KEYNOTE-189 trial. Although there are other potential first-line  
40  
41 221 treatments for advanced non-small cell lung cancer, our study did not indirectly compare them because of  
42  
43 222 the lack of convincing trial data and robust head-to-head trial data.

44  
45 223 Overall, the combination of pembrolizumab and chemotherapy for patients with metastatic NSCLC  
46  
47 224 that we studied has high incremental cost and modest incremental benefit. New treatment technology for  
48  
49 225 tumour is continuously undergoing development, but the price of tumour drugs is also rising dramatically.  
50  
51 226 Based on our analysis, pembrolizumab offers lower value at current cost. The provision of cost-effective  
52  
53 227 care requires new pricing and payment systems to support. The process for approving new drugs and the  
54  
55 228 process of incorporating them into the guidelines must balance costs and benefits, and our research can  
56  
57 229 offer decision-making information for this purpose.

58 230

231

232

233 **Acknowledgements:** I certify that no individuals other than the listed co-authors contributed to this  
234 publication.

235 **Author Contributions:** Study concepts and design: Chongqing Tan; Clinical program: Fang Ma;  
236 Analysis and interpretation of the data: Liubao Peng, Ye Peng, Qiao Liu; The drafting and revising of the  
237 paper: Xiaohui Zeng and Xiaomin Wan; Final approved of manuscript: All authors; all authors agree to  
238 be accountable for all aspects of the work.

239 **Funding:** This work was supported by the National Natural Science Foundation of China [grant numbers  
240 81401547, 81603081]; and the Key Science-Technology Research and Development Program of Hunan  
241 Province [grant number 2016JC2062].

242 **Conflict of interest:** None declared.

243 **Ethics statement:** Ethical approval was not necessary, because our economic evaluation is based on a  
244 mathematical model analysis, and does not contain any studies with human participants or animals  
245 performed.

246 **Data sharing statement:** The unit price we used in the article is freely available in Medicare & Medicaid  
247 Services ([https://www.cms.gov/Medicare/Medicare-Fee-for-Service-Part-B-Drugs/McrPartBDrugAvg](https://www.cms.gov/Medicare/Medicare-Fee-for-Service-Part-B-Drugs/McrPartBDrugAvgSalesPrice/index.html)  
248 [SalesPrice/index.html](https://www.cms.gov/Medicare/Medicare-Fee-for-Service-Part-B-Drugs/McrPartBDrugAvgSalesPrice/index.html)). And the clinical trial parameters we used in the manuscript are derived from  
249 published literature on PubMed (Gandhi L, Rodriguez-Abreu D, Gadgeel S, et al. Pembrolizumab plus  
250 Chemotherapy in Metastatic Non-Small-Cell Lung Cancer. *N Engl J Med* 2018; 378(22):2078-92. doi:  
251 10.1056/NEJMoa1801005). The datasets generated during the current study are available from the  
252 corresponding author on reasonable request.

253

254

255

256

257

258 **References**

- 259 1. WHO. International Agency for Research on Cancer. Estimated number of new cases in 2018,  
260 world, both sexes, all age. <http://globocan.iarc.fr>. Accessed 15 Dec 2018.
- 261 2. Nation Comprehensive Cancer Network. Non-small cell lung cancer. 2nd ed (2018).  
262 <https://www.nccn.org/>. Accessed 15 Dec 2018.
- 263 3. Peters S, Kerr KM, Stahel R. PD-1 blockade in advanced NSCLC: A focus on pembrolizumab.  
264 *Cancer Treat Rev* 2018;62:39-49. doi: 10.1016/j.ctrv.2017.10.002
- 265 4. Weiss GJ. A new era of treating advanced lung cancer is upon us. *Transl Lung Cancer Res*  
266 2018;7(Suppl 3):S202-S05. doi: 10.21037/tlcr.2018.07.03
- 267 5. Garon EB, Rizvi NA, Hui R, et al. Pembrolizumab for the treatment of non-small-cell lung cancer.  
268 *N Engl J Med* 2015;372(21):2018-28. doi: 10.1056/NEJMoa1501824
- 269 6. Scarpace SL. Metastatic squamous cell non-small-cell lung cancer (NSCLC): disrupting the drug  
270 treatment paradigm with immunotherapies. *Drugs Context* 2015;4:212289. doi: 10.7573/dic.212289
- 271 7. Armand P. Immune checkpoint blockade in hematologic malignancies. *Blood*  
272 2015;125(22):3393-400. doi: 10.1182/blood-2015-02-567453
- 273 8. Dang TO, Ogunniyi A, Barbee MS, et al. Pembrolizumab for the treatment of PD-L1 positive  
274 advanced or metastatic non-small cell lung cancer. *Expert Rev Anticancer Ther* 2016;16(1):13-20.  
275 doi: 10.1586/14737140.2016.1123626
- 276 9. Sul J, Blumenthal GM, Jiang X, et al. FDA Approval Summary: Pembrolizumab for the  
277 Treatment of Patients With Metastatic Non-Small Cell Lung Cancer Whose Tumors Express  
278 Programmed Death-Ligand 1. *Oncologist* 2016;21(5):643-50. doi: 10.1634/theoncologist.2015-0498
- 279 10. Gandhi L, Rodriguez-Abreu D, Gadgeel S, et al. Pembrolizumab plus Chemotherapy in  
280 Metastatic Non-Small-Cell Lung Cancer. *N Engl J Med* 2018;378(22):2078-92. doi:  
281 10.1056/NEJMoa1801005
- 282 11. Goldstein DA, Ahmad BB, Chen Q, et al. Cost-Effectiveness Analysis of Regorafenib for  
283 Metastatic Colorectal Cancer. *J Clin Oncol* 2015;33(32):3727-32. doi: 10.1200/JCO.2015.61.9569
- 284 12. Hoyle MW, Henley W. Improved curve fits to summary survival data: application to economic  
285 evaluation of health technologies. *BMC Med Res Methodol* 2011;11:139. doi:

- 1  
2  
3  
4  
5 286 10.1186/1471-2288-11-139
- 6  
7 287 13. Huang M, Lou Y, Pellissier J, et al. Cost-effectiveness of pembrolizumab versus docetaxel for  
8  
9 288 the treatment of previously treated PD-L1 positive advanced NSCLC patients in the United States. *J*  
10  
11 289 *Med Econ* 2017;20(2):140-50. doi: 10.1080/13696998.2016.1230123
- 12  
13 290 14. Huang M, Lou Y, Pellissier J, et al. Cost Effectiveness of Pembrolizumab vs. Standard-of-Care  
14  
15 291 Chemotherapy as First-Line Treatment for Metastatic NSCLC that Expresses High Levels of PD-L1  
16  
17 292 in the United States. *Pharmacoeconomics* 2017 doi: 10.1007/s40273-017-0527-z
- 18  
19 293 15. Centers for Disease Control and Prevention. Faststats. <http://www.cdc.gov/nchs/fastats>.  
20  
21 294 Accessed 15 Dec 2018.
- 22  
23 295 16. Center for Medicare and Medicaid Services. 2018-July-ASP-Pricing-File(2018).  
24  
25 296 <https://www.cms.gov/apps/ama/license.asp?File=/Medicare/Medicare-Fee-for-Service-Part-B-Drugs>  
26  
27 297 [/McrPartBDrugAvgSalesPrice/Downloads/2018-July-ASP-Pricing-File.zip](https://www.cms.gov/apps/ama/license.asp?File=/Medicare/Medicare-Fee-for-Service-Part-B-Drugs/McrPartBDrugAvgSalesPrice/Downloads/2018-July-ASP-Pricing-File.zip). Accessed 15 Dec 2018.
- 28  
29 298 17. Goldstein DA, Chen Q, Ayer T, et al. First- and second-line bevacizumab in addition to  
30  
31 299 chemotherapy for metastatic colorectal cancer: a United States-based cost-effectiveness analysis. *J*  
32  
33 300 *Clin Oncol* 2015;33(10):1112-8. doi: 10.1200/JCO.2014.58.4904
- 34  
35 301 18. Oh A, Tran DM, McDowell LC, et al. Cost-Effectiveness of Nivolumab-Ipilimumab  
36  
37 302 Combination Therapy Compared with Monotherapy for First-Line Treatment of Metastatic  
38  
39 303 Melanoma in the United States. *J Manag Care Spec Pharm* 2017;23(6):653-64. doi:  
40  
41 304 10.18553/jmcp.2017.23.6.653
- 42  
43 305 19. Chouaid C, Agulnik J, Goker E, et al. Health-related quality of life and utility in patients with  
44  
45 306 advanced non-small-cell lung cancer: a prospective cross-sectional patient survey in a real-world  
46  
47 307 setting. *J Thorac Oncol* 2013;8(8):997-1003. doi: 10.1097/JTO.0b013e318299243b [published  
48  
49 308 Online First: 2013/06/22]
- 50  
51 309 20. Nafees B, Stafford M, Gavriel S, et al. Health state utilities for non small cell lung cancer.  
52  
53 310 *Health Qual Life Outcomes* 2008;6:84. doi: 10.1186/1477-7525-6-84 [published Online First:  
54  
55 311 2008/10/23]
- 56  
57 312 21. Liao W, Huang J, Hutton D, et al. Cost-effectiveness analysis of first-line pembrolizumab  
58  
59 313 treatment for PD-L1 positive, non-small cell lung cancer in China. *J Med Econ* 2019;1. doi:



- 1  
2  
3  
4  
5 314 10.1080/13696998.2019.1570221  
6  
7 315 22. Chouaid C, Bensimon L, Clay E, et al. Cost-effectiveness analysis of pembrolizumab versus  
8  
9 316 standard-of-care chemotherapy for first-line treatment of PD-L1 positive (>50%) metastatic  
10  
11 317 squamous and non-squamous non-small cell lung cancer in France. *Lung Cancer* 2019;127:44-52.  
12  
13 318 doi: 10.1016/j.lungcan.2018.11.008  
14  
15 319 23. Hu X, Hay JW. First-line pembrolizumab in PD-L1 positive non-small-cell lung cancer: A  
16  
17 320 cost-effectiveness analysis from the UK health care perspective. *Lung Cancer* 2018;123:166-71. doi:  
18  
19 321 10.1016/j.lungcan.2018.07.012  
20  
21 322 24. Georgieva M, da Silveira Nogueira Lima JP, Aguiar P, Jr., et al. Cost-effectiveness of  
22  
23 323 pembrolizumab as first-line therapy for advanced non-small cell lung cancer. *Lung Cancer*  
24  
25 324 2018;124:248-54. doi: 10.1016/j.lungcan.2018.08.018  
26  
27 325 25. Reck M, Rodriguez-Abreu D, Robinson AG, et al. Pembrolizumab versus Chemotherapy for  
28  
29 326 PD-L1-Positive Non-Small-Cell Lung Cancer. *N Engl J Med* 2016;375(19):1823-33. doi:  
30  
31 327 10.1056/NEJMoa1606774  
32  
33 328 26. Kesselheim AS, Avorn J, Sarpatwari A. The High Cost of Prescription Drugs in the United  
34  
35 329 States: Origins and Prospects for Reform. *Jama* 2016;316(8):858-71. doi: 10.1001/jama.2016.11237  
36  
37 330 27. Goldstein DA, Gordon N, Davidescu M, et al. A Pharmacoeconomic Analysis of Personalized  
38  
39 331 Dosing vs Fixed Dosing of Pembrolizumab in Firstline PD-L1-Positive Non-Small Cell Lung  
40  
41 332 Cancer. *J Natl Cancer Inst* 2017;109(11) doi: 10.1093/jnci/djx063  
42  
43 333 28. Medicare Payment Advisory Commission. March 2018 Report To the Congress: Medicare  
44  
45 334 Payment Policy. <http://www.medpac.gov/-documents-/reports>. Accessed 15 Dec 2018.  
46  
47 335  
48  
49  
50  
51  
52  
53  
54  
55  
56  
57  
58  
59  
60

336 Table 1 Parameters for Cost Effectiveness Model

| Parameter                                           | Pembrolizumab |             | Placebo |             | Distribution |
|-----------------------------------------------------|---------------|-------------|---------|-------------|--------------|
|                                                     | Value         | Ranges      | Value   | Ranges      |              |
| Probabilities                                       |               |             |         |             |              |
| PFS (Weibull)                                       |               |             |         |             |              |
| Scale( $\lambda$ )                                  | 0.0448        |             | 0.0876  |             |              |
| Shape( $\gamma$ )                                   | 1.2675        |             | 1.2312  |             |              |
| OS(exponential)                                     |               |             |         |             |              |
| Scale( $\lambda$ )                                  | 0.0290        |             | 0.0586  |             |              |
| Costs (\$)                                          |               |             |         |             |              |
| Pembrolizumab/mg <sup>16</sup>                      | 48.57         | +/- 25%     | 48.57   | +/- 25%     | Lognorm      |
| Pemetrexed/mg <sup>16</sup>                         | 6.75          | +/- 25%     | 6.75    | +/- 25%     | Lognorm      |
| Cisplatin/mg <sup>16</sup>                          | 0.20          | +/- 25%     | 0.20    | +/- 25%     | Lognorm      |
| Carboplatin/mg <sup>16</sup>                        | 0.06          | +/- 25%     | 0.06    | +/- 25%     | Lognorm      |
| Chemotherapy infusion 1 hour <sup>16</sup>          | 145           | +/- 25%     | 145     | +/- 25%     | Lognorm      |
| Chemotherapy infusion additional hour <sup>16</sup> | 32            | +/- 25%     | 32      | +/- 25%     | Lognorm      |
| Subsequent therapies/cycle <sup>16</sup>            | 1160          | +/- 25%     | 4394    | +/- 25%     | Lognorm      |
| End-of-life care <sup>14</sup>                      | 33009         | +/- 25%     | 33009   | +/- 25%     | Lognorm      |
| AE hospitalization cost <sup>13</sup>               | 3538          | +/- 50%     | 3005    | +/-50%      | Lognorm      |
| Baseline utilities                                  |               |             |         |             |              |
| PFS <sup>19</sup>                                   | 0.71          | 0.67–0.76   | 0.71    | 0.67–0.76   | Beta         |
| disease progression survival <sup>19</sup>          | 0.67          | 0.59–0.75   | 0.67    | 0.59–0.75   | Beta         |
| Disutilities                                        |               |             |         |             |              |
| Neutropenia <sup>20</sup>                           | 0.09          | 0.060-0.119 | 0.09    | 0.060-0.119 | Beta         |
| Pneumonia <sup>20</sup>                             | 0.09          | 0.059-0.121 | 0.09    | 0.059-0.121 | Beta         |

337 PFS: progression-free survival; OS: overall survival; AE: adverse effect.

338

339 Table 2 Pembrolizuman plus Chemotherapy Cost-Effectiveness at Additional Modeled Price Points

| Parameter             | Base-Case Model Analysis* |        |
|-----------------------|---------------------------|--------|
| WTP value, \$/QALY    | 100000                    | 15000  |
| Nivolumab cost, \$/mg | 12.05                     | 31.38  |
| Total cost, \$        | 176197                    | 235651 |
| QALYs                 | 1.61                      | 1.61   |
| ICER, \$/QALY         | 99915                     | 149907 |

340 ICER: incremental cost-effectiveness ratio; QALY: quality-adjusted life-year; WTP: Willingness-to-pay.

341 \* Only the cost of pembrolizumab was varied.

342

343

344

345

346

347

348

349

350

351

352

353

354

355

356

357

358

359

360

1  
2  
3  
4  
5 361 **Fig.1** State transition diagram. The three circles show three main health states. Patients can transition  
6  
7 362 from “progression-free survival” to “disease progression survival” or “death”  
8  
9 363

10 364 **Fig.2** Tornado diagrams. The graphic shows the impact of varying individual model inputs on the  
11  
12 365 cost-effectiveness of pembrolizumab plus chemotherapy for metastatic NSCLC. ICER: incremental  
13  
14 366 cost-effectiveness ratio. NSCLC: non-small cell lung cancer  
15  
16 367

17  
18 368 **Fig.3** Cost-effectiveness acceptability curve. This plot represents the results of a probabilistic sensitivity  
19  
20 369 analysis (for details, see Methods) comparing the cost-effectiveness of  
21  
22 370 pembrolizumab-pemetrexed-platinum versus placebo-pemetrexed-platinum in metastatic NSCLC. CE:  
23  
24 371 cost-effectiveness. NSCLC: non-small cell lung cancer  
25  
26  
27  
28  
29  
30  
31  
32  
33  
34  
35  
36  
37  
38  
39  
40  
41  
42  
43  
44  
45  
46  
47  
48  
49  
50  
51  
52  
53  
54  
55  
56  
57  
58  
59  
60



Fig.1 State transition diagram. The three circles show three main health states. Patients can transition from "progression-free survival" to "disease progression survival" or "death"

82x45mm (600 x 600 DPI)

1  
2  
3  
4  
5  
6  
7  
8  
9  
10  
11  
12  
13  
14  
15  
16  
17  
18  
19  
20  
21  
22  
23  
24  
25  
26  
27  
28  
29  
30  
31  
32  
33  
34  
35  
36  
37  
38  
39  
40  
41  
42  
43  
44  
45  
46  
47  
48  
49  
50  
51  
52  
53  
54  
55  
56  
57  
58  
59  
60



Fig.2 Tornado diagrams. The graphic shows the impact of varying individual model inputs on the cost-effectiveness of pembrolizumab plus chemotherapy for metastatic NSCLC. ICER: incremental cost-effectiveness ratio. NSCLC: non-small cell lung cancer

889x254mm (300 x 300 DPI)



Fig.3 Cost-effectiveness acceptability curve. This plot represents the results of a probabilistic sensitivity analysis (for details, see Methods) comparing the cost-effectiveness of pembrolizumab-pemetrexed-platinum versus placebo-pemetrexed-platinum in metastatic NSCLC. CE: cost-effectiveness. NSCLC: non-small cell lung cancer

169x104mm (600 x 600 DPI)



**Supplementary appendix 1.** Survival curves. PFS and OS were fitted with Weibull and exponential model, respectively, according to the original curves shown in clinical trials. PFS: progression-free survival; OS: overall survival.



## Supplementary appendix 2 Results for subgroup analyses

| Subgroup                     | OS HR (95% CI)   | PFS HR (95% CI)  | ICER   | Cost-effectiveness probability at the threshold of \$100000/QALY | Cost-effectiveness probability at the threshold of \$150000/QALY |
|------------------------------|------------------|------------------|--------|------------------------------------------------------------------|------------------------------------------------------------------|
| Sex                          |                  |                  |        |                                                                  |                                                                  |
| Male                         | 0.70 (0.50–0.99) | 0.66 (0.50–0.87) | 172432 | 0                                                                | 15%                                                              |
| Female                       | 0.29 (0.19–0.44) | 0.40 (0.29–0.54) | 115344 | 3%                                                               | 100%                                                             |
| Smoking status               |                  |                  |        |                                                                  |                                                                  |
| Current or former            | 0.54 (0.41–0.71) | 0.54 (0.43–0.66) | 151882 | 0                                                                | 40%                                                              |
| Never                        | 0.23 (0.10–0.54) | 0.43 (0.23–0.81) | 99695  | 36%                                                              | 100%                                                             |
| PD-L1 tumor proportion score |                  |                  |        |                                                                  |                                                                  |
| <1%                          | 0.59 (0.38–0.92) | 0.75 (0.53–1.05) | 132478 | 1%                                                               | 86%                                                              |
| 1-49%                        | 0.55 (0.34–0.90) | 0.55 (0.37–0.81) | 152694 | 0                                                                | 38%                                                              |
| ≥50%                         | 0.42 (0.26–0.68) | 0.36 (0.25–0.52) | 154361 | 0                                                                | 30%                                                              |

PFS: progression-free survival; OS: overall survival; HR: hazard ratio; ICER: incremental cost-effectiveness ratio; QALY: quality-adjusted life year.

## Consolidated Health Economic Evaluation Reporting Standards – CHEERS Checklist 1

**CHEERS Checklist****Items to include when reporting economic evaluations of health interventions**

The **ISPOR CHEERS Task Force Report**, *Consolidated Health Economic Evaluation Reporting Standards (CHEERS)—Explanation and Elaboration: A Report of the ISPOR Health Economic Evaluations Publication Guidelines Good Reporting Practices Task Force*, provides examples and further discussion of the 24-item CHEERS Checklist and the CHEERS Statement. It may be accessed via the *Value in Health* or via the ISPOR Health Economic Evaluation Publication Guidelines – CHEERS: Good Reporting Practices webpage: <http://www.ispor.org/TaskForces/EconomicPubGuidelines.asp>

| Section                         | Item No | Recommendation                                                                                                                                                                          | Reported on page No/line No |
|---------------------------------|---------|-----------------------------------------------------------------------------------------------------------------------------------------------------------------------------------------|-----------------------------|
| <b>Title and Abstract</b>       |         |                                                                                                                                                                                         |                             |
| Title                           | 1       | Identify the study as an economic evaluation or use more specific terms such as “cost-effectiveness analysis”, and describe the interventions compared.                                 | P1/L1-2                     |
| Abstract                        | 2       | Provide a structured summary of objectives, perspective, setting, methods (including study design and inputs), results (including base case and uncertainty analyses), and conclusions. | P2/L33-45                   |
| <b>Introduction</b>             |         |                                                                                                                                                                                         |                             |
| Background and objectives       | 3       | Provide an explicit statement of the broader context for the study.<br>Present the study question and its relevance for health policy or practice decisions.                            | P2-3/L58-76                 |
| <b>Methods</b>                  |         |                                                                                                                                                                                         |                             |
| Target population and subgroups | 4       | Describe characteristics of the base case population and subgroups analysed, including why they were chosen.                                                                            | P3/L79-80                   |
| Setting and location            | 5       | State relevant aspects of the system(s) in which the decision(s) need(s) to be made.                                                                                                    | P3/L81-85                   |
| Study perspective               | 6       | Describe the perspective of the study and relate this to the costs being evaluated.                                                                                                     | P3/L76                      |
| Comparators                     | 7       | Describe the interventions or strategies being compared and state why they were chosen.                                                                                                 | P3/L82                      |
| Time horizon                    | 8       | State the time horizon(s) over which costs and consequences are being evaluated and say why appropriate.                                                                                | P3/L88-89                   |
| Discount rate                   | 9       | Report the choice of discount rate(s) used for costs and outcomes and say why appropriate.                                                                                              | P3/L88                      |
| Choice of health outcomes       | 10      | Describe what outcomes were used as the measure(s) of benefit in the evaluation and their relevance for the type of analysis performed.                                                 | P3/L90-91                   |
| Measurement of effectiveness    | 11a     | <i>Single study-based estimates</i> : Describe fully the design features of the single effectiveness study and why the single                                                           |                             |

## Consolidated Health Economic Evaluation Reporting Standards – CHEERS Checklist 2

|                                                        |     |                                                                                                                                                                                                                                                                                                                                                       |               |
|--------------------------------------------------------|-----|-------------------------------------------------------------------------------------------------------------------------------------------------------------------------------------------------------------------------------------------------------------------------------------------------------------------------------------------------------|---------------|
|                                                        |     | study was a sufficient source of clinical effectiveness data.                                                                                                                                                                                                                                                                                         |               |
|                                                        | 11b | <i>Synthesis-based estimates</i> : Describe fully the methods used for identification of included studies and synthesis of clinical effectiveness data.                                                                                                                                                                                               | P5/L126-130   |
| Measurement and valuation of preference based outcomes | 12  | If applicable, describe the population and methods used to elicit preferences for outcomes.                                                                                                                                                                                                                                                           |               |
| Estimating resources and costs                         | 13a | <i>Single study-based economic evaluation</i> : Describe approaches used to estimate resource use associated with the alternative interventions. Describe primary or secondary research methods for valuing each resource item in terms of its unit cost. Describe any adjustments made to approximate to opportunity costs.                          |               |
|                                                        | 13b | <i>Model-based economic evaluation</i> : Describe approaches and data sources used to estimate resource use associated with model health states. Describe primary or secondary research methods for valuing each resource item in terms of its unit cost. Describe any adjustments made to approximate to opportunity costs.                          | P4-5/L104-125 |
| Currency, price date, and conversion                   | 14  | Report the dates of the estimated resource quantities and unit costs. Describe methods for adjusting estimated unit costs to the year of reported costs if necessary. Describe methods for converting costs into a common currency base and the exchange rate.                                                                                        | P3/L86-87     |
| Choice of model                                        | 15  | Describe and give reasons for the specific type of decision-analytical model used. Providing a figure to show model structure is strongly recommended.                                                                                                                                                                                                | P3/L79        |
| Assumptions                                            | 16  | Describe all structural or other assumptions underpinning the decision-analytical model.                                                                                                                                                                                                                                                              | P3/L80-85     |
| Analytical methods                                     | 17  | Describe all analytical methods supporting the evaluation. This could include methods for dealing with skewed, missing, or censored data; extrapolation methods; methods for pooling data; approaches to validate or make adjustments (such as half cycle corrections) to a model; and methods for handling population heterogeneity and uncertainty. | P5/L131-137   |
| <b>Results</b>                                         |     |                                                                                                                                                                                                                                                                                                                                                       |               |
| Study parameters                                       | 18  | Report the values, ranges, references, and, if used, probability distributions for all parameters. Report reasons or sources for distributions used to represent uncertainty where appropriate. Providing a table to show the input values is strongly recommended.                                                                                   | P12/L321      |
| Incremental costs and outcomes                         | 19  | For each intervention, report mean values for the main categories of estimated costs and outcomes of interest, as well as mean differences between the comparator groups. If                                                                                                                                                                          | P5/L139-144   |

## Consolidated Health Economic Evaluation Reporting Standards – CHEERS Checklist 3

|                                                                      |     |                                                                                                                                                                                                                                                                              |                |
|----------------------------------------------------------------------|-----|------------------------------------------------------------------------------------------------------------------------------------------------------------------------------------------------------------------------------------------------------------------------------|----------------|
|                                                                      |     | applicable, report incremental cost-effectiveness ratios.                                                                                                                                                                                                                    |                |
| Characterizing uncertainty                                           | 20a | <i>Single study-based economic evaluation</i> : Describe the effects of sampling uncertainty for the estimated incremental cost and incremental effectiveness parameters, together with the impact of methodological assumptions (such as discount rate, study perspective). |                |
|                                                                      | 20b | <i>Model-based economic evaluation</i> : Describe the effects on the results of uncertainty for all input parameters, and uncertainty related to the structure of the model and assumptions.                                                                                 | P6/L145-157    |
| Characterizing heterogeneity                                         | 21  | If applicable, report differences in costs, outcomes, or cost-effectiveness that can be explained by variations between subgroups of patients with different baseline characteristics or other observed variability in effects that are not reducible by more information.   |                |
| <b>Discussion</b>                                                    |     |                                                                                                                                                                                                                                                                              |                |
| Study findings, limitations, generalizability, and current knowledge | 22  | Summarise key study findings and describe how they support the conclusions reached. Discuss limitations and the generalisability of the findings and how the findings fit with current knowledge.                                                                            | P6-P8/L158-202 |
| <b>Other</b>                                                         |     |                                                                                                                                                                                                                                                                              |                |
| Source of funding                                                    | 23  | Describe how the study was funded and the role of the funder in the identification, design, conduct, and reporting of the analysis. Describe other non-monetary sources of support.                                                                                          | P8/L210-212    |
| Conflicts of interest                                                | 24  | Describe any potential for conflict of interest of study contributors in accordance with journal policy. In the absence of a journal policy, we recommend authors comply with International Committee of Medical Journal Editors recommendations.                            | P8/L213        |

For consistency, the CHEERS Statement checklist format is based on the format of the CONSORT statement checklist

The **ISPOR CHEERS Task Force Report** provides examples and further discussion of the 24-item CHEERS Checklist and the CHEERS Statement. It may be accessed via the *Value in Health* link or via the ISPOR Health Economic Evaluation Publication Guidelines – CHEERS: Good Reporting Practices webpage: <http://www.ispor.org/TaskForces/EconomicPubGuidelines.asp>

The citation for the CHEERS Task Force Report is:  
 Husereau D, Drummond M, Petrou S, et al. Consolidated health economic evaluation reporting standards (CHEERS)—Explanation and elaboration: A report of the ISPOR health economic evaluations publication guidelines good reporting practices task force. *Value Health* 2013;16:231-50.
