# Supplementary material for: Cost-effectiveness analysis of pembrolizumab plus chemotherapy for previously untreated metastatic non-small cell lung cancer in the USA
Source: PubMed Central journal article supplement — BMJ Open. 2019 Dec 11;9(12):e031019. doi: 10.1136/bmjopen-2019-031019 (PMC6924863; doi:10.1136/bmjopen-2019-031019), 2019-12-11
Supplement: bmjopen-2019-031019supp001.pdf [file bmjopen-2019-031019supp001.pdf]

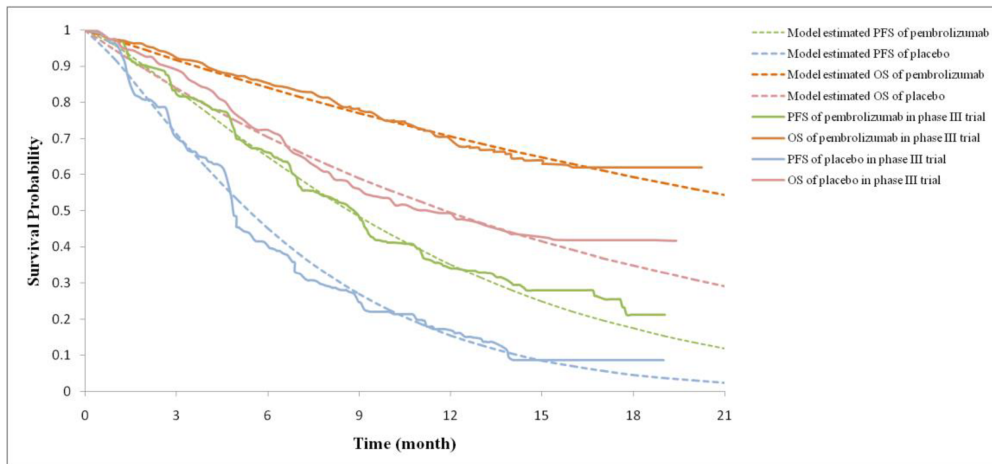

**Supplementary appendix 1.** Survival curves. PFS and OS were fitted with Weibull and exponential model, respectively, according to the original curves shown in clinical trials. PFS: progression-free survival; OS: overall survival.
