# Supplementary material for: Cost-effectiveness analysis of pembrolizumab plus chemotherapy for previously untreated metastatic non-small cell lung cancer in the USA
Source: PubMed Central journal article supplement — BMJ Open. 2019 Dec 11;9(12):e031019. doi: 10.1136/bmjopen-2019-031019 (PMC6924863; doi:10.1136/bmjopen-2019-031019), 2019-12-11
Supplement: bmjopen-2019-031019supp002.pdf [file bmjopen-2019-031019supp002.pdf]

## Supplementary appendix 2 Results for subgroup analyses

| Subgroup                        | OS HR (95% CI)   | PFS HR (95% CI)  | ICER   | Cost-effectiveness probability<br>at the threshold of<br>\$100000/QALY | Cost-effectiveness probability<br>at the threshold of<br>\$150000/QALY |
|---------------------------------|------------------|------------------|--------|------------------------------------------------------------------------|------------------------------------------------------------------------|
| Sex                             |                  |                  |        |                                                                        |                                                                        |
| Male                            | 0.70 (0.50–0.99) | 0.66 (0.50–0.87) | 172432 | 0                                                                      | 15%                                                                    |
| Female                          | 0.29 (0.19–0.44) | 0.40 (0.29–0.54) | 115344 | 3%                                                                     | 100%                                                                   |
| Smoking status                  |                  |                  |        |                                                                        |                                                                        |
| Current or former               | 0.54 (0.41–0.71) | 0.54 (0.43–0.66) | 151882 | 0                                                                      | 40%                                                                    |
| Never                           | 0.23 (0.10–0.54) | 0.43 (0.23–0.81) | 99695  | 36%                                                                    | 100%                                                                   |
| PD-L1 tumor<br>proportion score |                  |                  |        |                                                                        |                                                                        |
| <1%                             | 0.59 (0.38–0.92) | 0.75 (0.53–1.05) | 132478 | 1%                                                                     | 86%                                                                    |
| 1–49%                           | 0.55 (0.34–0.90) | 0.55 (0.37–0.81) | 152694 | 0                                                                      | 38%                                                                    |
| ≥50%                            | 0.42 (0.26–0.68) | 0.36 (0.25–0.52) | 154361 | 0                                                                      | 30%                                                                    |

PFS: progression-free survival; OS: overall survival; HR: hazard ratio; ICER: incremental cost-effectiveness ratio; QALY: quality-adjusted life year.
